# Supplementary material
Source: publisher site journal article supplement (https://journals.iucr.org/services/coeditors/meetings/jcomm/appendices2006.pdf)
Supplement: Supplementary file 1 [file appendices2006.pdf]

## APPENDIX A

### Statistical report

#### A.1. Manuscripts received by Co-editors

The number of manuscripts submitted to Acta in 2005 was 25% higher than in 2004. Sections B, E and F showed increases in submission levels; Sections A, C and D showed decreases. The largest decrease was for Section A, from 135 to 98. The combined number of submissions to Sections D and F decreased slightly from 615 to 554. The largest change was for Section E, which increased from 2383 to 3679; the total number of short structural papers submitted to Sections C and E increased from 3460 to 4625. In total, 5442 Acta manuscripts were submitted, compared with 4353 in 2004 and 3220 in 2003.

The number of manuscripts submitted to JAC was 196, compared with 226 in 2004 and 216 in 2003.

A total of 103 manuscripts were submitted to JSR, compared with 133 for both 2004 and 2003.

#### Manuscripts received by Co-editors

|            | 1998 | 1999 | 2000 | 2001 | 2002 | 2003 | 2004 | 2005 |
|------------|------|------|------|------|------|------|------|------|
| Acta A     | 153  | 88   | 117  | 121  | 124  | 123  | 135  | 98   |
| Acta B     | 117  | 128  | 131  | 148  | 141  | 122  | 143  | 165  |
| Acta C     | 1147 | 1189 | 1233 | 733  | 738  | 850  | 1077 | 946  |
| Acta D     | 297  | 313  | 376  | 432  | 504  | 530  | 499  | 233  |
| Acta E     |      |      | 119  | 883  | 1036 | 1595 | 2383 | 3679 |
| Acta F     |      |      |      |      |      |      | 116  | 321  |
| Acta total | 1714 | 1718 | 1976 | 2317 | 2543 | 3220 | 4353 | 5442 |
| JAC        | 192  | 326  | 165  | 175  | 260  | 216  | 226  | 196  |
| JSR        | 326  | 86   | 420  | 98   | 114  | 133  | 133  | 103  |
| TOTAL      | 2232 | 2130 | 2561 | 2590 | 2917 | 3569 | 4712 | 5741 |

#### A.2. Papers accepted

The number of Acta papers accepted for publication by Co-editors in 2005 was 4048, a 29% increase on 2004 when 3149 were accepted. Sections B and E showed increases in the number of papers accepted of 5% and 58%, respectively; Sections A and C showed decreases of 43% and 28%, respectively, while the overall number of papers accepted for Sections D and F decreased by 1%.

The number of papers accepted for JAC was 146, compared with 167 in 2004 and 277 in 2003. It should be noted that the high number of accepted papers in 2003 included papers for the SAS2002 Conference Issue.

A total of 104 papers were accepted for JSR, compared with 86 in 2004 and 97 in 2003.

#### Accepted papers received in Chester

|            | 1998 | 1999 | 2000 | 2001 | 2002 | 2003 | 2004 | 2005 |
|------------|------|------|------|------|------|------|------|------|
| Acta A     | 133  | 71   | 92   | 85   | 84   | 75   | 95   | 54   |
| Acta B     | 104  | 119  | 122  | 106  | 118  | 82   | 91   | 96   |
| Acta C     | 944  | 962  | 915  | 510  | 471  | 512  | 561  | 404  |
| Acta D     | 271  | 304  | 349  | 395  | 467  | 486  | 446  | 211  |
| Acta E     |      |      | 77   | 794  | 937  | 1370 | 1899 | 2996 |
| Acta F     |      |      |      |      |      |      | 57   | 287  |
| Acta total | 1452 | 1456 | 1555 | 1890 | 2077 | 2525 | 3149 | 4048 |
| JAC        | 152  | 220  | 178  | 138  | 138  | 277  | 167  | 146  |
| JSR        | 243  | 155  | 327  | 82   | 99   | 97   | 86   | 104  |
| TOTAL      | 1847 | 1831 | 2060 | 2110 | 2314 | 2899 | 3402 | 4298 |

### A.3. Papers published

Overall, 12986 Acta pages were published in 2005, compared with 10175 in 2004 and 8735 in 2003. This represents an increase of 28% on the 2004 level; the number of printed pages decreased from 5499 to 4445. 622 pages were printed for Section A (644 in 2004), 730 for Section B (763 in 2004), 1412 for Section C (1694 in 2004) and 1681 for Section D (2406 in 2004). Section E published 7439 electronic only pages (4676 in 2004) and Section F published 1102 electronic only pages in its first year of publication.

The average length of Full Articles in Section B decreased to 8.5 pages and the average lengths of Full Articles in Sections A, C and D increased to 9.2, 3.2 and 7.8 pages, respectively. The average length of Full Articles in Section E remained the same at 2.6 pages while the average length of Full Articles in Section F was 3.5 pages. Average publication times increased for Sections B (5.8 months), C (2.4 months) and D (5.8 months), and fell for Section A (5.1 months). Average publication times remained the same for Section E (0.8 months) and were 2.2 months for Section F. The changes for Section D reflect the transfer of crystallization and other short paper types to Section F.

The number of Full Articles published in JAC in 2005 was 111 (110 in 2004). The number of pages increased from 1041 to 1045. The average review time decreased to 4.3 months and the technical editing time decreased to 2.1 months; the overall publication time was 6.4 months.

The number of Full Articles published in JSR in 2005 was 115 (85 in 2004). The number of pages increased to 838 in 2005 (512 in 2004). The average review time increased to 6.1 months and the technical editing time increased to 2.7 months; the overall publication time increased to 8.8 months. The publication time for standard papers (i.e. those not published as part of a special issue) was 6.3 months made up of a review time of 4.0 months and a technical editing time of 2.3 months.

#### Pages(papers) published

|            | 1999       | 2000       | 2001       | 2002       | 2003        | 2004        | 2005        |
|------------|------------|------------|------------|------------|-------------|-------------|-------------|
| Acta A     | 1073(122)  | 649(82)    | 803(103)   | 630(102)   | 628(83)     | 644(96)     | 622(74)     |
| Acta B     | 1128(126)  | 1127(137)  | 877(110)   | 1088(132)  | 821(88)     | 763(87)     | 730(87)     |
| Acta C     | 2192(929)  | 2179(943)  | 1504(545)  | 1570(535)  | 1482(482)   | 1694(556)   | 1412(439)   |
| Acta D     | 2079(394)  | 1723(339)  | 1980(390)  | 2243(457)  | 2385(466)   | 2406(511)   | 1681(233)   |
| Acta E     |            |            | 1998(800)  | 2374(922)  | 3419(1305)  | 4676(1811)  | 7439(2887)  |
| Acta F     |            |            |            |            |             |             | 1102(311)   |
| Acta total | 6472(1571) | 5678(1501) | 7162(1948) | 7905(2148) | 8735(2424)  | 10183(3061) | 12896(4031) |
|            |            |            |            |            |             |             |             |
| JAC        | 1208(192)  | 1468(259)  | 798(140)   | 760(128)   | 1505(282)   | 1041(170)   | 1045(157)   |
| JSR        | 1209(311)  | 419(65)    | 1255(376)  | 413(93)    | 475(108)    | 512(119)    | 838(136)    |
|            |            |            |            |            |             |             |             |
| TOTAL      | 8889(2074) | 7565(1825) | 9215(2464) | 9078(2369) | 10715(2814) | 11736(3350) | 14779(4324) |

#### Average publication times for full articles

|        | Year | Review process (months) | Editing/printing (months) | Publication time (months) |
|--------|------|-------------------------|---------------------------|---------------------------|
| Acta A | 2005 | 3.3                     | 1.8                       | 5.1                       |
|        | 2004 | 4.2                     | 2.0                       | 6.2                       |
|        | 2003 | 2.7                     | 1.8                       | 4.5                       |
|        | 2002 | 3.1                     | 2.5                       | 5.6                       |
|        | 2001 | 3.1                     | 4.1                       | 7.2                       |
|        | 2000 | 3.1                     | 3.7                       | 6.8                       |
|        | 1999 | 4.6                     | 6.5                       | 11.1                      |
| Acta B | 1998 | 4.1                     | 5.3                       | 9.4                       |
|        | 2005 | 3.7                     | 2.1                       | 5.8                       |
|        | 2004 | 2.9                     | 1.9                       | 4.8                       |
|        | 2003 | 3.2                     | 2.2                       | 5.4                       |
|        | 2002 | 2.9                     | 3.3                       | 6.2                       |
|        | 2001 | 3.5                     | 3.6                       | 7.2                       |
|        | 2000 | 3.5                     | 5.1                       | 8.5                       |

|        |      |     |     |      |
|--------|------|-----|-----|------|
|        | 1999 | 5.1 | 6.4 | 11.6 |
|        | 1998 | 5.3 | 7.9 | 13.1 |
| Acta C | 2005 | 1.3 | 1.1 | 2.4  |
|        | 2004 | 1.1 | 1.2 | 2.3  |
|        | 2003 | 1.1 | 1.1 | 2.2  |
|        | 2002 | 1.3 | 1.4 | 2.7  |
|        | 2001 | 2.0 | 2.8 | 4.8  |
|        | 2000 | 2.3 | 2.9 | 5.2  |
|        | 1999 | 2.8 | 4.0 | 6.8  |
|        | 1998 | 3.2 | 5.2 | 8.4  |
| Acta D | 2005 | 3.4 | 2.4 | 5.8  |
|        | 2004 | 2.5 | 1.8 | 4.3  |
|        | 2003 | 2.9 | 2.0 | 4.9  |
|        | 2002 | 3.2 | 2.0 | 5.2  |
|        | 2001 | 3.0 | 2.5 | 5.5  |
|        | 2000 | 3.2 | 2.4 | 5.7  |
|        | 1999 | 3.4 | 3.7 | 7.0  |
|        | 1998 | 3.5 | 7.1 | 10.6 |
| Acta E | 2005 | 0.6 | 0.2 | 0.8  |
|        | 2004 | 0.5 | 0.2 | 0.8  |
|        | 2003 | 0.5 | 0.4 | 0.9  |
|        | 2002 | 0.6 | 0.4 | 0.9  |
|        | 2001 | 0.6 | 0.4 | 1.0  |
| Acta F | 2005 | 1.7 | 0.5 | 2.2  |
| JAC    | 2005 | 4.3 | 2.1 | 6.4  |
|        | 2004 | 4.4 | 2.2 | 6.7  |
|        | 2003 | 4.7 | 2.6 | 7.3  |
|        | 2002 | 4.5 | 2.7 | 7.1  |
|        | 2001 | 4.7 | 3.3 | 8.0  |
|        | 2000 | 5.4 | 4.4 | 9.8  |
|        | 1999 | 4.9 | 5.2 | 10.1 |
|        | 1998 | 5.0 | 7.6 | 12.5 |
| JSR    | 2005 | 6.1 | 2.7 | 8.8  |
|        | 2004 | 4.9 | 1.7 | 6.5  |
|        | 2003 | 5.5 | 2.7 | 8.2  |
|        | 2002 | 4.6 | 2.0 | 6.6  |
|        | 2001 | 3.5 | 2.6 | 6.1  |
|        | 2000 | 3.9 | 2.5 | 6.3  |
|        | 1999 | 3.6 | 2.8 | 6.4  |
|        | 1998 | 4.2 | 3.1 | 7.3  |

#### A.4. Manuscripts rejected and withdrawn

The overall rejection rate for the journals (14%) was up from 2004 (13%). The rejection rates were highest for Sections C (31%) and B (27%) and lowest for Section F (4%) and JSR (6%). Withdrawal rates were highest for Section C (27%, as in 2004); the overall withdrawal rate was 11%, down from 13% in 2004.

#### Manuscripts rejected and withdrawn

|        | Year | Number accepted | Number rejected | Number withdrawn | Rejection (%) | Withdrawal (%) |
|--------|------|-----------------|-----------------|------------------|---------------|----------------|
| Acta A | 2005 | 54              | 17              | 17               | 19            | 19             |

|        |      |      |     |     |    |    |
|--------|------|------|-----|-----|----|----|
|        | 2004 | 95   | 23  | 21  | 17 | 15 |
|        | 2003 | 75   | 26  | 26  | 20 | 20 |
|        | 2002 | 84   | 23  | 10  | 20 | 9  |
|        | 2001 | 85   | 14  | 10  | 10 | 5  |
|        | 2000 | 92   | 18  | 8   | 15 | 7  |
|        | 1999 | 71   | 11  | 9   | 12 | 10 |
| Acta B | 2005 | 96   | 41  | 13  | 27 | 9  |
|        | 2004 | 91   | 27  | 26  | 19 | 18 |
|        | 2003 | 82   | 22  | 21  | 18 | 17 |
|        | 2002 | 118  | 20  | 8   | 14 | 5  |
|        | 2001 | 106  | 12  | 6   | 10 | 5  |
|        | 2000 | 122  | 24  | 9   | 15 | 6  |
|        | 1999 | 119  | 11  | 8   | 8  | 6  |
| Acta C | 2005 | 404  | 299 | 265 | 31 | 27 |
|        | 2004 | 561  | 239 | 291 | 22 | 27 |
|        | 2003 | 512  | 121 | 191 | 15 | 23 |
|        | 2002 | 471  | 101 | 176 | 14 | 24 |
|        | 2001 | 511  | 74  | 220 | 9  | 27 |
|        | 2000 | 915  | 78  | 298 | 6  | 23 |
|        | 1999 | 766  | 76  | 224 | 7  | 21 |
| Acta D | 2005 | 211  | 28  | 37  | 10 | 13 |
|        | 2004 | 446  | 37  | 33  | 7  | 6  |
|        | 2003 | 486  | 23  | 24  | 4  | 5  |
|        | 2002 | 467  | 19  | 10  | 4  | 2  |
|        | 2001 | 396  | 9   | 11  | 2  | 3  |
|        | 2000 | 349  | 22  | 6   | 6  | 2  |
|        | 1999 | 304  | 9   | 11  | 3  | 3  |
| Acta E | 2005 | 2996 | 342 | 256 | 10 | 7  |
|        | 2004 | 1899 | 253 | 203 | 11 | 9  |
|        | 2003 | 1370 | 81  | 117 | 5  | 7  |
|        | 2002 | 937  | 37  | 67  | 4  | 6  |
|        | 2001 | 794  | 24  | 53  | 3  | 6  |
|        | 2000 | 77   | 1   | 6   | 1  | 7  |
| Acta F | 2005 | 287  | 13  | 17  | 4  | 5  |
|        | 2004 | 57   | 1   | 1   | 2  | 2  |
| JAC    | 2005 | 146  | 33  | 23  | 16 | 11 |
|        | 2004 | 167  | 26  | 33  | 12 | 15 |
|        | 2003 | 277  | 25  | 28  | 8  | 8  |
|        | 2002 | 138  | 26  | 18  | 14 | 10 |
|        | 2001 | 138  | 17  | 33  | 9  | 18 |
|        | 2000 | 178  | 13  | 18  | 6  | 9  |
|        | 1999 | 220  | 23  | 17  | 9  | 7  |
| JSR    | 2005 | 104  | 7   | 5   | 6  | 4  |
|        | 2004 | 86   | 10  | 13  | 9  | 12 |
|        | 2003 | 97   | 9   | 10  | 8  | 9  |
|        | 2002 | 99   | 3   | 3   | 3  | 3  |
|        | 2001 | 82   | 13  | 20  | 11 | 17 |
|        | 2000 | 327  | 37  | 13  | 10 | 3  |

|         |      |      |     |     |    |    |
|---------|------|------|-----|-----|----|----|
|         | 1999 | 155  | 8   | 7   | 5  | 4  |
| Overall | 2005 | 4298 | 780 | 633 | 14 | 11 |
|         | 2004 | 3402 | 616 | 621 | 13 | 13 |
|         | 2003 | 2899 | 307 | 417 | 8  | 12 |
|         | 2002 | 2314 | 229 | 292 | 8  | 10 |
|         | 2001 | 2112 | 163 | 353 | 6  | 13 |
|         | 2000 | 2060 | 193 | 358 | 7  | 14 |
|         | 1999 | 1635 | 138 | 276 | 7  | 13 |

### A.5. Citation statistics

The citation statistics for 1996-2005 are shown below.

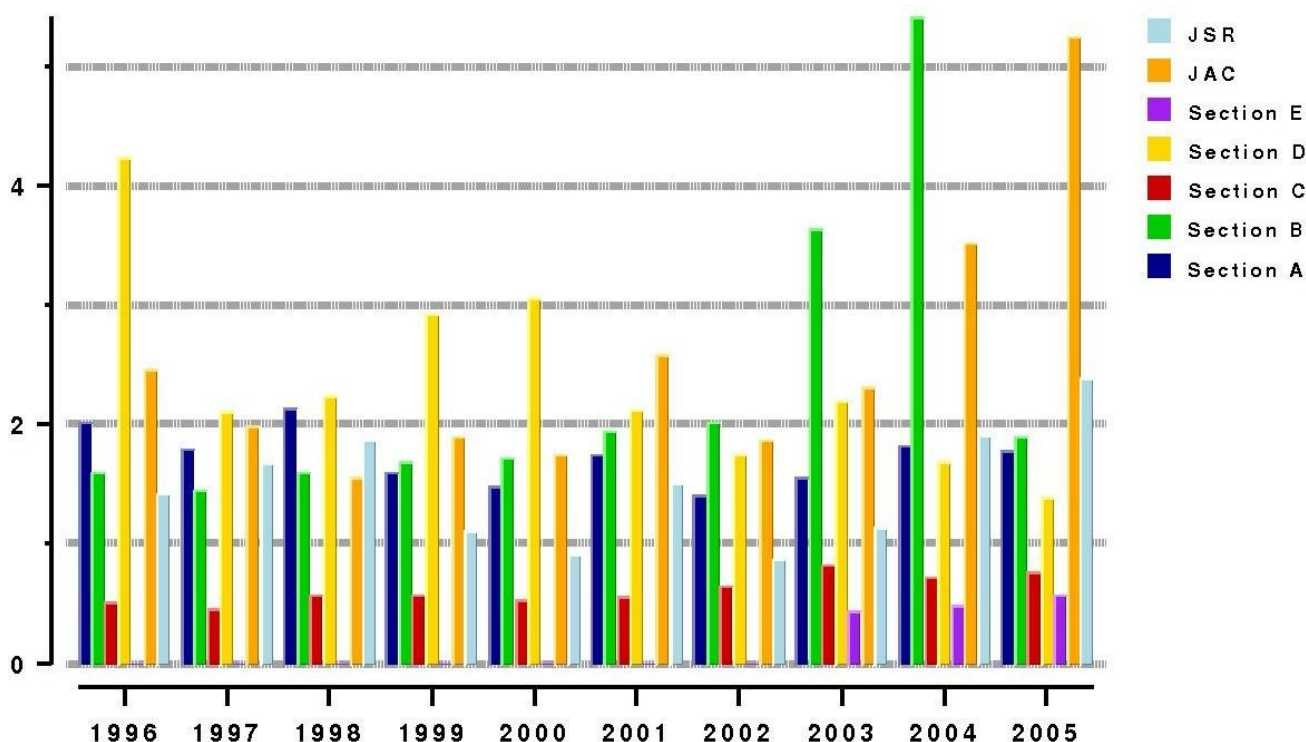

The impact factor of JAC increased to 5.2, and there were also increases for Acta Cryst. C and E, and JSR. As expected, Acta Cryst. B decreased to a more normal level (1.9). There were also small decreases for Acta Cryst. A and D. In the case of Acta Cryst. D, the effect of no longer publishing Crystallization Papers will only start to be seen in next year's impact factors.

### Crystallography

| Rank | Abbreviated Journal Title | 2005 Total Cites | Impact Factor | Immediacy Index | 2005 Articles | Cited Half-life |
|------|---------------------------|------------------|---------------|-----------------|---------------|-----------------|
| 1    | <b>J APPL CRYSTALLOGR</b> | 14417            | 5.248         | 0.45            | 131           | 8.9             |
| 2    | CRYST GROWTH DES          | 1859             | 3.551         | 0.989           | 284           | 2.2             |
| 3    | CRYSTENGCOMM              | 1351             | 3.508         | 0.723           | 119           | 2.7             |
| 4    | J MOL GRAPH MODEL         | 2776             | 2.333         | 0.17            | 47            | 9.2             |
| 5    | POLYHEDRON                | 9448             | 1.957         | 0.265           | 407           | 7.3             |
| 6    | <b>ACTA CRYSTALLOGR B</b> | 10085            | 1.91          | 0.541           | 85            | >10.0           |
| 7    | <b>ACTA CRYSTALLOGR A</b> | 8912             | 1.791         | 0.623           | 61            | >10.0           |
| 8    | J CRYST GROWTH            | 19109            | 1.681         | 0.335           | 1102          | 6.3             |
| 9    | Z KRISTALLOGR             | 2872             | 1.472         | 0.507           | 134           | >10.0           |
| 10   | LIQ CRYST                 | 3445             | 1.432         | 0.211           | 147           | 7.3             |
| 11   | <b>ACTA CRYSTALLOGR D</b> | 8553             | 1.401         | 0.469           | 226           | 7.1             |
| 12   | STRUCT CHEM               | 580              | 1.333         | 0.05            | 80            | 4.8             |
| 13   | CRYST ENG                 | 197              | 1.208         |                 | 0             | 4.5             |
| 14   | J INCL PHENOM MACRO       | 1476             | 1.02          | 0.14            | 100           | 6.1             |
| 15   | CRYST RES TECHNOL         | 1306             | 0.833         | 0.126           | 183           | 6.1             |
| 16   | <b>ACTA CRYSTALLOGR C</b> | 6582             | 0.777         | 0.529           | 437           | 10              |

|    |                           |      |       |       |      |       |
|----|---------------------------|------|-------|-------|------|-------|
| 17 | PHASE TRANSIT             | 675  | 0.671 | 0.188 | 85   | >10.0 |
| 18 | CHINESE J STRUC CHEM      | 617  | 0.669 | 0.129 | 264  | 2.9   |
| 19 | J CHEM CRYSTALLOGR        | 647  | 0.583 | 0.134 | 142  | 5.6   |
| 20 | <b>ACTA CRYSTALLOGR E</b> | 3322 | 0.581 | 0.325 | 2849 | 1.7   |
| 20 | CRYSTALLOGR REP+          | 1675 | 0.581 | 0.07  | 200  | >10.0 |
| 22 | PROG CRYST GROWTH CH      | 384  | 0.526 |       |      | 9.9   |
| 23 | MOL CRYST LIQ CRYST       | 4758 | 0.468 | 0.052 | 465  | >10.0 |
| 24 | Z KRIST-NEW CRYST ST      | 587  | 0.312 | 0.128 | 235  | 4.4   |

### Instruments and Instrumentation

| Rank | Abbreviated Journal Title   | Total Cites | Impact factor | Immediacy Index | Articles | Cited Half-life |
|------|-----------------------------|-------------|---------------|-----------------|----------|-----------------|
| 1    | SENSOR ACTUAT B-CHEM        | 11581       | 2.646         | 0.213           | 738      | 5.4             |
| 2    | J MICROMECH MICROENG        | 2903        | 2.499         | 0.299           | 361      | 3.9             |
| 3    | <b>J SYNCHROTRON RADIAT</b> | 1893        | 2.392         | 0.558           | 120      | 4.9             |
| 4    | APPL SPECTROSC REV          | 338         | 2.357         | 0.462           | 13       | 9               |
| 5    | J CHEMOMETR                 | 1269        | 1.875         | 0.079           | 38       | 6.8             |
| 6    | APPL SPECTROSC              | 5855        | 1.868         | 0.303           | 201      | 7.6             |
| 7    | CHEMOMETR INTELL LAB        | 2532        | 1.77          | 0.319           | 94       | 7.1             |
| 8    | SMART MATER STRUCT          | 2310        | 1.67          | 0.167           | 228      | 5.2             |
| 9    | METROLOGIA                  | 1395        | 1.479         | 0.382           | 102      | 7               |
| 10   | SENSOR ACTUAT A-PHYS        | 6066        | 1.363         | 0.17            | 470      | 5.6             |
| 11   | MICROFLUID NANOFUID         | 18          | 1.286         | 0.219           | 32       |                 |
| 12   | REV SCI INSTRUM             | 15216       | 1.235         | 0.291           | 818      | 7.7             |
| 13   | LASER PHYS LETT             | 155         | 1.225         | 0.245           | 102      | 1.4             |
| 14   | NUCL INSTRUM METH A         | 16290       | 1.224         | 0.189           | 1359     | 5.4             |
| 15   | SENSORS-BASEL               | 217         | 1.208         | 0.082           | 49       | 3.2             |
| 16   | NUCL INSTRUM METH B         | 12230       | 1.181         | 0.115           | 1341     | 6.2             |
| 17   | IEEE SENS J                 | 471         | 1.1           | 0.065           | 186      | 2.9             |
| 18   | SENS LETT                   | 64          | 1.085         | 0               | 45       |                 |
| 19   | MEAS SCI TECHNOL            | 3487        | 1.079         | 0.271           | 329      | 5.6             |
| 20   | INFRARED PHYS TECHN         | 681         | 1.051         | 0.067           | 60       | 8               |

## APPENDIX B

### Commission on Journals

#### Annual Reports to the Executive Committee

##### Overview

Comparing 2005 with 2004, the increase in the number of published pages has continued. This increase has been largely driven by the expansion of Acta Cryst. E and the launch of Acta Cryst. F in January 2005, as well as by an expanded number of pages for Journal of Synchrotron Radiation. The citation impact of IUCr Journals continued to be high occupying three of the top six ranking positions in crystallography. The overall withdrawal plus rejection rate for the journals was 25% in 2005, compared with 26% in 2004.

The first issue of Acta Cryst. F: Structural Biology and Crystallization Communications was published in January 2005, the major IUCr Journals event of 2005. The new journal is edited by H. Einspahr and M. Guss, and publishes protein structure, structural genomics and crystallization communications. Acta Cryst. F had a successful first year with over 300 articles and 1100 pages published. Extensive work has been made jointly with the Protein Data Bank by H. Einspahr concerning streamlined deposition-to-publication methodologies for Acta Cryst. F.

The IUCr Congress, held at Firenze in Italy, proved to be one of the largest ever Congresses in terms of numbers of attendees. It also proved an outstanding opportunity for the Commission on Journals and for the promotion of the journals. A joint launch party for Acta Cryst. F and International Tables Online proved to be a very popular event with approximately 500 guests.

Before the Congress the Journals Commission met in Montecatini Terme and held a very intensive programme of discussions and various decisions were taken. Notable amongst these decisions was the policy to allow Co-editors to return manuscripts with language problems to authors before refereeing. This policy is intended to help the streamlining of handling of papers, particularly for Acta Cryst. C and E.

At the IUCr General Assembly J. R. Helliwell delivered his third and final report as Editor-in-Chief. He emphasised the general health and vitality of the journals, made possible by enthusiastic cohorts of editors and referees gladly serving the wider crystallographic community. He noted the apparent challenge from the open publishing drive of research funding agencies (e.g. those in the US and UK) whose view was that publicly funded research should be freely available to the public. He also stressed his view that IUCr's policies and pricing structures were open and transparent, as well as good value, and thus these would compete well in the new 'golden open access' era that these research agencies wished to see established, and which would now pay for such open access fees in research grant awards. Members of the General Assembly, he argued, should be very vigilant on this matter. The General Assembly confirmed the appointment of Gernot Kostorz as the next Editor-in-Chief of the IUCr Journals and Chairman of the IUCr Journals Commission.

**John R. Helliwell**, Editor-in-Chief, August 1996 to August 2005

**Gernot Kostorz**, Editor-in-Chief, August 2005--

##### Acta Crystallographica Section A

Section A published 622 pages in 2005, down from 644 in 2004. In addition, the abstracts of the IUCr Florence meeting comprise 498 pages. 5.2 issues were regular while 80% of the January issue, i.e. 121 pages, was a special issue on Phase Transitions edited by Guest Editor D. Pandey. The number of pages devoted to research papers and short communications also decreased from 619 to 531; without special issues, the decrease is from 459 to 410 pages. The average publication time for regular papers decreased from 6.2 to 5.1 months; the average review time was 3.3 months.

There were 55 full research papers, including 10 in the special issue, giving an average of 9.2 pages per article. This is somewhat more than in the past years (7.8 pages). These numbers include two Topical Reviews, on time-resolved X-ray diffraction by Coppens et al., and on "forbidden" resonant reflections by Dmitriev et al. There were 5 short communications. The portions of 19% of withdrawn and 19% of rejected manuscripts remain high and are slightly increasing. The numbers of submitted and of accepted papers in 2005 show an important decrease: Section A shrinks alarmingly. The report for 2006 will have to mention the thinnest issue ever. There is no backlog in the editorial offices. One of the reasons may be a trend to mathematically difficult papers for which Foundations of Crystallography certainly is the preferred platform, but which are outside the scope of many crystallographers. Topics such as aperiodic crystals, or electron densities, tend to move to Section B.

Section A is a high-level journal with a very diverse range of topics, including geometry, topology, twinning, growth

models; anomalous scattering; perfect, distorted, faulted crystals in diverse environments; theories and methods of structure determination and the phase problem; electron diffraction, convergent-beam method, diffraction theory; phase transitions. Single-particle imaging has all but vanished. The geographical distribution of the origins of the articles (counted as integral or half-integral numbers) remains nearly unchanged with Europe 60%, the Americas 23% and Asia+Australia 17%. The co-editors perform well, but the work is very unequally distributed: 46% of the submissions are handled by two Co-editors, a third Co-editor adds 10%. But even with few papers to handle, some co-editors face a considerable workload since many papers are difficult to handle.

In the pipeline for 2006 are two special issues, the second part of Phase Transitions, and the proceedings of the 2005 MaThCryst Summer School in Nancy (this appeared in March 2006). I have good hopes that at least one commissioned Lead Article will be submitted in 2006, but commissioning of Lead Articles remains difficult. In addition, there is a Special 60th Anniversary Issue planned for January 2008.

**D. Schwarzenbach**, Editor of Section A

### **Acta Crystallographica Section B**

The 2005 statistics for Section B of *Acta* show that the number of articles has been essentially constant for three years (88, 87, 87 for 2003-2005). The number of pages, however, was down again in 2005 (821, 763, 730) because papers were slightly shorter. The average length of a full paper has varied since 2002 between 8.5 and 10 pages; the average for articles published in 2005 was at the low end of that range.

There is no question that competition from *CrystEngComm* (started in 1999 by the Royal Society of Chemistry) and *Cryst. Growth Des.* (started in 2001 by the American Chemical Society) has been important. An analysis over five years shows that most of the decline in Section B pages is in the categories of metal-organic and organic papers, which are the categories most likely to be affected by the two competing journals. The inorganic category of papers remains strong. Section B is attracting a good share of the papers that report determinations of modulated and incommensurate structures, and activity in this area is expanding. The number of papers reporting diffraction from polycrystalline samples is also increasing.

Concern about the decreased number of Section B pages printed in 2005 is mitigated by the very significant increase in pages printed in the first two issues of 2006.

The impact factor continued to rise in 2005. An important factor in the very strong trend (values 2.0, 3.6, 5.4 announced in 2003-2005 for articles published in the previous year) is almost certainly a consequence of the special 2002 issue on databases. Since impact factors are calculated for articles published in the three most recent years the database issue of 2002 will not contribute to impact factors in the future.

The time to publication has been essentially steady since 2002 (5.4, 4.8, 5.8 months in 2003-2005). It seems unlikely that those times can be reduced significantly without putting undue pressure on referees and authors.

The decision was made in 2005 to limit the number of figures printed in color to those for which color was judged to be very important to the information content of the drawing. Figures can always appear in color in the online version of the journal.

The Chester Staff, and especially Jill Bradshaw, continues to do a wonderful job in arranging the components of the papers (text, figures, tables, schemes and footnotes) to produce pages that are attractively balanced and papers that are easy for readers to follow. An additional constraint has been the attempt to reduce printing costs by placing color figures so that the number of pages printed in color is minimized. Mention must also be made of the significant help provided by the Chester office in making the English usage as standard as possible. This assistance is very much appreciated by all.

During 2005 Co-Editors Peter Jones, Luigi Nassimbeni and Max Taylor retired, each having completed three full terms of fine service to the journal. We welcomed to the Board new Co-Editors Carl Henrik Görbitz, Jim Kaduk, Finn Krebs Larsen, Lynne McCusker, Urszula Rychlewska and Mark Spackman.

**Carolyn P. Brock**, Editor of Section B

### **Acta Crystallographica Section C**

Acta Crystallographica Section C continues to specialize in the rapid publication of high-quality studies of novel and challenging crystal and molecular structures. Publication times are now steady with the majority of technically correct and well-written papers appearing on line (<http://journals.iucr.org/c>) within two months of submission. In 2005,

Section C published 437 papers (41 inorganic, 134 metal-organic, 262 organic) in a total of 1412 pages - a 18% decrease in papers over 2004. This decrease almost certainly arises from changes which were made to the 2005 Notes for authors in an attempt to improve the quality of initial submissions. After review some 58% of submissions to Acta Cryst. C in the past year were either subsequently withdrawn by the authors or rejected - an 9 % increase over 2004. As noted in previous years, the principal reasons for this withdrawal/rejection rate were that either the text in the Comment section of the CIF was deemed not to provide the "significant added value to the numerical data freely available in the CIF" as detailed in Notes for Authors, or that the text in the Comment section was very poorly crafted and difficult to understand.

I must also acknowledge and warmly thank John Helliwell who retired from being Editor-in-Chief of the Acta Journals for his support and advice over the last six years, and also Frank R. Fronczek, Bill Stallings and Max Taylor, who have now retired from the Section C Editorial Board, for their services to Section C and to the crystallographic community.

The high standard of Acta C papers is due in no small part to the careful work of Co-editors, referees and the Chester staff; once again I very much appreciate the fine work done by these colleagues.

**G. Ferguson**, Editor of Section C

### **Acta Crystallographica Section D**

The past year has been one of significant change for Acta Crystallographica Section D, following the creation of its all-electronic sister journal, Acta Crystallographica Section F. The first immediate consequence was that Crystallization Papers, which had begun to dominate Acta D, in number if not in pages, would be moved to Acta F. Since these generally receive few citations, it was expected that the impact factor of Acta D would increase, leading to an ability to attract more high-profile structural papers. A second consequence was the need to develop clear roles and identities for these two journals, an issue which is still evolving.

With the removal of Crystallization Papers, which represented a significant part of its previous content (about 40% of pages in 2004), it was unclear to what extent Acta D would diminish in size. In the event, the flow of Research Papers in both structural biology and crystallographic methods has increased by just over 20% (from 165 in 2004 to 200 in 2005). When added to 24 Short Communications, this increase in structural and methodological papers is a good sign for the future. Other contributions to the journal included a topical review on post-crystallization treatments for improving crystal quality by Begona Heras and Jennifer Martin and a historical essay by Cele Abad-Zapatero. We are keen to further diversify the journal through such articles. Sadly, the journal also noted, with an affectionate obituary by N. Yathindra, the death of another pioneering crystallographer, Muttaiya Sundaralingam, who died, with his wife, in the Asian tsunami of December 2004.

Twelve issues of Acta Crystallographica section D were published in 2005, with a total number of pages of 1681, a decrease from the 2004 number. Among these, the June issue was a Special Issue, covering the proceedings of the 10th International Conference on the Crystallization of Biological Molecules, held in Beijing in 2004. Guest Editors for this issue were Dr. J. D. Ng and Dr. M. Bartlam. Protein crystallization methods are enjoying a resurgence of activity, which is reflected in the wide range of articles. In a departure from previous years, a decision was made to delay publication of the Special Issue dedicated to the annual CCP4 study weekend until the first issue of 2006. Papers from these issues are highly cited, and publication in January each year will mean that the impact factor of the journal will benefit from their citation over the whole of that year.

One issue to arise in relation to Special Issues is that of refereeing. The standards of the journal require that articles submitted for Special Issues should be refereed. This can conflict with the expectation of authors who anticipate that their conference presentation will be published, as of right. We hold firmly to the view that all articles must be refereed, and will not be published if they do not meet the standards of peer review.

One clear trend that has emerged during 2006 is for many structural papers to be shorter, less discursive and with less descriptive detail. This is a trend in all journals that publish structural biology papers, in part driven by space and cost considerations, but also by the increasing accessibility of structural information from resources such as the Protein Data Bank. In some cases, papers have been submitted that are effectively structure reports. Some are from structural genomics projects, but others are mutants, ligand complexes or new crystal forms which bring little new information and may be driven by pressures on authors to publish. The slightly increased number of papers that were rejected (10%) or withdrawn (13%) in 2005 reflects this trend.

In this context, an important discussion took place between the Editors and Co-Editors of Acta D and Acta F at the Journals Commission meeting in Montecatini Terme, in August 2005. This related to the differentiation of the two journals, and led to a decision that structural papers published in Acta D should contain "new insights into chemistry, biology or structure". This has been added to the Notes for Authors for 2006. Structural papers that do not meet these criteria are transferred to Acta F for consideration, with the authors' agreement. This is a somewhat subjective

judgement, and may sometimes be uneven in its application, but it should raise the profile of Acta D. What is important for both journals is that we continue to insist on the publication of full experimental details so that results are validated and can be replicated.

All submissions to Acta Cryst. D are now electronic and the on-line system is working extremely well. For that special thanks are due to the staff taking care of Acta Cryst. D at the Chester Office, especially Louise Jones, who also makes a remarkable contribution to the beautiful finished quality of the journal.

**Ted Baker and Zbyszek Dauter**, Editors of Section D

### **Acta Crystallographica Section E**

The year 2005 has seen another sustained period of growth for Acta Cryst. Section E. The proportions (%) of papers published in each category were: inorganic 3, metal-organic 29, organic 68, a total of 2996 papers, in 7439 pages, compared with 4676 pages in 2004. The average length of papers remained the same, at 2.6 pages. The average publication time remained the same at 0.8 month.

During the year 342 papers were rejected and 256 withdrawn. This represents a total rejection and withdrawal rate of 16% of papers received. The distribution of papers by country of principal author saw increases for People's Republic of China and India, and decreases for the USA and Turkey.

The journal's impact factor has risen from 0.453 to 0.491.

For authors, the most important development has been the introduction of a new system for the submission, handling and tracking of papers. This new procedure, which was developed and tested in 2005 and made standard for 2006, is designed to be easier to use at all stages, for authors, for Co-editors, and for the Editorial Office staff. The submission of a new paper now involves uploading all relevant files in a single operation, the online selection of a Co-editor, and the author's declaration regarding copyright and ethical issues. Any CIF generating a level A alert will not pass the submission stage unless an author response to such alerts is included; this response is assessed by the Co-editor as part of the review process. Revisions to submitted papers are also made through the web interface, at the Co-editor's invitation, and the status of the paper can be checked at any time. The introduction of this new system has been a major development task for the Chester staff, and is a very welcome step forward in streamlining our operations.

The Notes for Authors have been extensively revised to take account of the various changes; they are available, together with much other important and useful material, in the Author Services section of the journal web site at <http://journals.iucr.org/e/services/authorservices.html>.

In order to apply some restraint to the journal's growth and in response to a decision of the IUCr Executive Committee to limit the number of published pages, there is now a limit of 400 words on the Comment section; papers longer than this, which must be justified in the submission process as a response to a level A alert, will be accepted only at the discretion of the Co-editors and Section Editors, and such exceptions are intended to be rare.

The task of reviewing and editing papers is undertaken by our team of expert Co-editors, whose time is valuable and must not be wasted on dealing with poorly prepared submissions. Papers which are difficult to understand, which fall well short of the requirements of the Notes for Authors, or which require extensive text correction and editing will be returned to the author for revision without a detailed review; it is the responsibility of authors, not of Co-editors, to generate an acceptable text for the Abstract, Comment and Experimental sections and to ensure that other CIF items are correct and complete. Co-editors and the Section Editors make moderate changes where required so that papers conform to the journal's standards and style. Authors can save the Co-editors considerable effort and time by checking their own papers before submission for errors, unacceptable and undesirable features; a list of common problems, which corresponds to guidelines provided to the Co-editors, is given in the Author checklist at <http://journals.iucr.org/e/services/authorchecklist.html>.

To cope with the increasing number of papers submitted to the Journal we appointed a number of new co-editors (in two batches) during 2005: Professor Mehmet Akkurt (Erciyes University, Turkey), Professor Len Barbour (University of Stellenbosch, South Africa), Professor Sylvain Bernes (Universidad Autonoma de Puebla, Mexico), Dr Andrew Bond (University of Southern Denmark, Odense, Denmark), Professor Ivan Brito (Universidad de Antofagasto, Chile), Dr Matyas Czugler (Hungarian Academy of Sciences, Budapest, Hungary), Dr Catharine Esterhuysen (University of Stellenbosch, South Africa), Dr Jan Fabry (Academy of Sciences of the Czech Republic, Prague, Czech Republic), Dr Andreas Fischer (Royal Institute of Technology, Stockholm, Sweden), Professor Maria Gdaniec (A. Mickiewicz University, Poznan, Poland), Professor Tuncer Hokelek (Hacettepe University, Turkey), Professor Ning-Hai Hu (Chinese Academy of Sciences, Changchun, People's Republic of China), Dr Huub Kooijman (Utrecht University, The Netherlands), Professor Ramaswamy Rajaram (Madurai Kamaraj University, Madurai, India), Dr Manuela da Silva (Universidade de Coimbra, Portugal), Professor Alex Slawin (University of St. Andrew's, Scotland), Professor Duan-Jun

Xu (Zhejiang University, People's Republic of China), Professor Bohari Yamin (Universiti Kebangsaan Malaysia, Malaysia). This brings the total number of co-editors to 48, or 50 including the two section editors.

Finally we again thank the editorial staff in the Chester office for all their help and dedication. In particular, we are indebted to Gillian Holmes and Sean Conway who look after Section E on a daily basis.

**W. Clegg and D. G. Watson**, Editors of Section E

### **Acta Crystallographica Section F**

*Acta Crystallographica Section F: Structural Biology and Crystallization Communications* was launched by the International Union of Crystallography with the January issue in 2005. This purely electronic journal for biological crystallography is now more than a year old, and its first year has been a good one, the 12 issues published included over 300 articles and 1100 pages.

One of the primary reasons for launching the journal was to allow authors in fields such as structural genomics and macromolecular crystallization to benefit from the fast turnaround of electronic-only publication and, in its first year, the journal has worked very hard to ensure rapid publication. The result: average publication time from submission to publication including peer review was just 2.2 months. The journal has also been working during the year on a streamlined route from database deposition to publication. Volunteers are now testing a version of the RCSB program PDB\_EXTRACT that has been adapted to harvest data identified as required or recommended for publication by consensus of the editorial boards of *Acta Cryst. F & D*.

In January we were gratified to learn that *Acta Cryst. F* had been approved for inclusion in Medline. In February, the entire first volume was sent to the National Library of Medicine so that *Acta Cryst. F* will be accessible *via* PubMed from the first issue on and we have begun to hear from interested authors what we have learned ourselves, namely that attempts at PubMed access to *Acta Cryst. F* now meet with success.

In addition to indexing by Medline, the journal has been accredited by the Institute for Scientific Information, leading to inclusion of articles in the Science Citation Index. The journal is also covered by other major databases such as Chemical Abstracts, and, as part of Crystallography Journals Online, benefits from indexing by search engines such as Google and Scirus.

We are proud of the success of *Acta Crystallographica Section F* in its first year of publication. It is due in no small measure to the dedication and hard work of the editorial staff in Chester and of our excellent team of Co-editors, to whom we are very grateful. To cope with the high flow of articles and the retirements of two of our founding co-editors, Alice Vrielink and Adriana Zagari, we have had to expand the Editorial Board. We now welcome Terese Bergfors (Uppsala University), JuanMa García-Ruiz (University of Granada) and Bart Hazes (University of Alberta) as new members.

**Howard Einspahr and Mitchell Guss**, Editors of Section F

### **Journal of Applied Crystallography**

*JAC* published 1,045 pages in 2005 (1,049 in 2004). The number of full articles was 111 in 2005 (110 in 2004). Shorter items like Short Communications, Laboratory Notes, Letters to the Editor *etc.* remained at the same level (about 25) during the last three years. The number of manuscripts submitted was 196, compared with 226 in 2004 and 216 in 2003. The impact factor was 3.53 in 2005 (2.21 in 2004).

Efforts are continuing to make *JAC* an even more attractive medium for crystallography-based work in all fields, e.g. by appropriate pamphlets distributed at relevant conferences, or the choice of new Co-editors in promising fields. In 2005, S. Ciccariello, W. I. F. David, P. F. Fewster and K. A. Kantardjieff were appointed as Co-editors with this idea in mind, but also to maintain certain areas of competence as S. S. Hasnain, A. M. Moore, A. Oskarsson, D. Pandey and H. Zimmermann finished their 9-year terms.

On-line submission is now almost exclusively used and works well. The publication time fell slightly to 6.4 months (4.3 months for editors/reviewers and 2.1 months for production). It has again been a pleasure to interact with the Chester staff who handled all matters arising with great competence and kindness.

**G. Kostorz**, Editor of *JAC*

### **Journal of Synchrotron Radiation**

For the 2005 calendar year, JSR published 121 articles and a total of 838 pages in the six issues. This was a sizable increase in the number of articles (> 40%) and the number of pages (> 60%) as compared with 2004. This is due in large part to six Special Issues that were published in 2005; BioXAS and Metallogenomics (Isabella Ascone, Guest Editor, January 2005), Applications of Synchrotron Radiation to Materials Research (Gopal Shenoy and P. James Viccaro, Guest Editors, March 2005), Radiation Damage in Macromolecules (Elspeth Garman and Colin Nave, Guest Editors, May 2005), Softer X-rays in Structural Studies (R. J. Cernik, J. R. Helliwell and M. Helliwell, Guest Editors, July 2005), Structure Determination by Single-Crystal X-ray Diffraction at Megabar Pressures (P. Dera, C. T. Prewitt and S. D. Jacobsen, Guest Editors, September 2005) and Synchrotron Radiation and Nanobioscience (Eugenia Pechkova and Claudio Nicolini, Guest Editors, November 2005). We believe that the publication of selected papers from workshops is an important service to the synchrotron radiation community and we plan to continue this in the future. The Facility Information pages where one page per issue is devoted to each of the three third-generation hard X-ray sources (APS, ESRF and Spring-8) was continued in 2005. These pages provide an opportunity for these facilities to communicate important news and updates to the international community of synchrotron radiation users.

In 2005, the terms expired for several Co-editors including John Helliwell, Janos Kirz and James Penner-Hahn. We would like to take this opportunity to express our thanks for their contributions to the Journal of Synchrotron Radiation and to welcome two new Co-editors, Sean McSweeney and Soichi Wakatsuki.

**Å. Kvick, D. M. Mills, and T. Ohta**, Editors of JSR

## APPENDIX C

### Information on individual journals

#### Background information on Section A

##### Papers submitted (2001-2006)

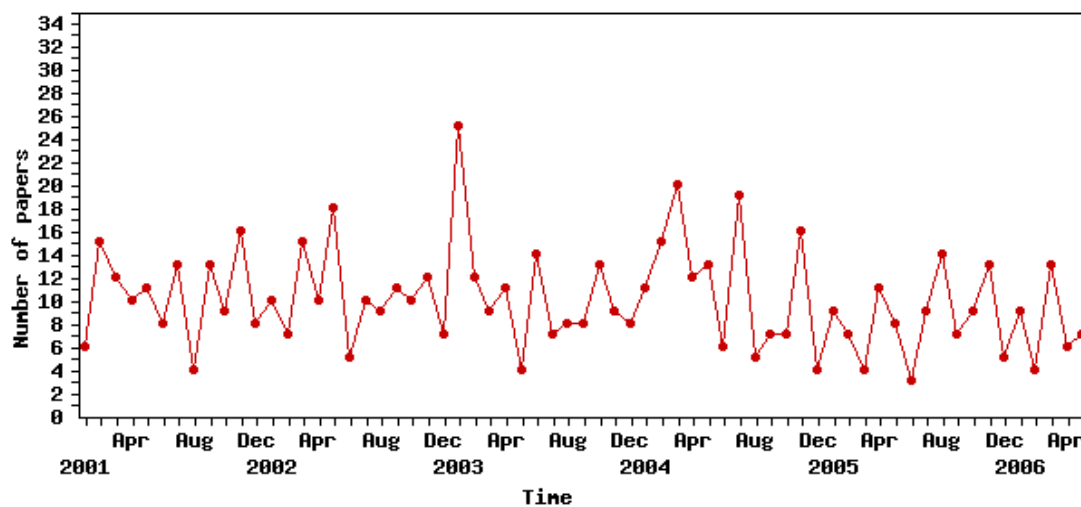

##### Papers published (2001-2006)

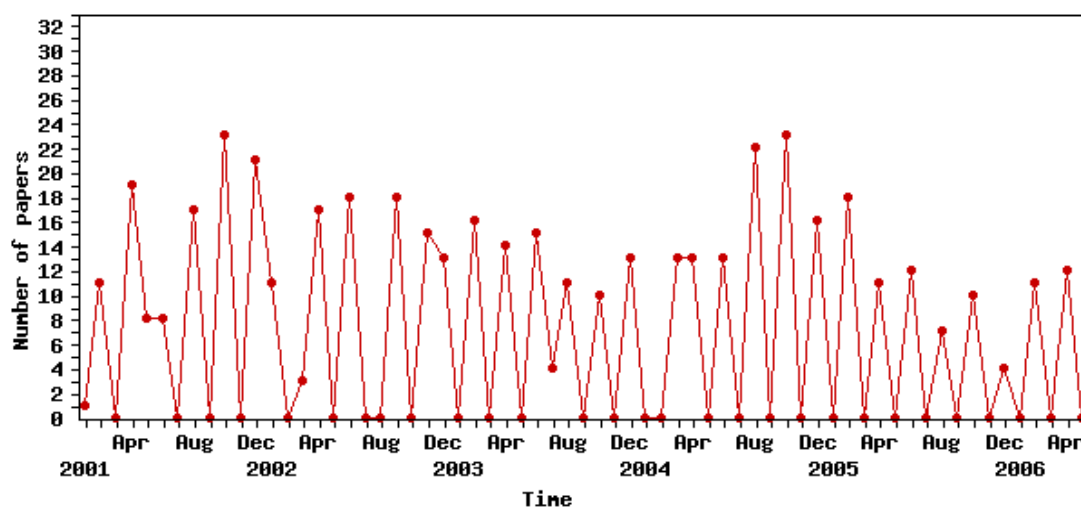

##### Numbers at a glance Acta Crystallographica Section A

|                           |       |
|---------------------------|-------|
| Consortia deals           | 2595  |
| Institutional subscribers | 618   |
| Individual subscribers    | 67    |
| Impact Factor (2005)      | 1.791 |
| Ranking (2005)            | 7/24  |

## Acta Crystallographica Section A - competing journals based on citing

Number of times articles published in 2004 (in journals below) cited articles published in *Acta Crystallographica Section A*

| Impact | Citing Journal      | Cited Year |      |      |      |      |      |      |      |      |      |
|--------|---------------------|------------|------|------|------|------|------|------|------|------|------|
|        |                     | All Yrs    | 2004 | 2003 | 2002 | 2001 | 2000 | 1999 | 1998 | 1997 | 1996 |
|        | ALL JOURNALS        | 9186       | 35   | 114  | 142  | 103  | 110  | 132  | 128  | 87   | 142  |
| 0.491  | ACTA CRYSTALLOGR E  | 661        | 0    | 0    | 1    | 0    | 0    | 0    | 0    | 0    | 1    |
| 1.829  | ACTA CRYSTALLOGR A  | 393        | 20   | 40   | 29   | 24   | 32   | 21   | 15   | 24   | 9    |
| 1.693  | ACTA CRYSTALLOGR D  | 378        | 0    | 10   | 1    | 6    | 2    | 2    | 2    | 4    | 4    |
| 0.728  | ACTA CRYSTALLOGR C  | 315        | 0    | 0    | 0    | 0    | 0    | 3    | 2    | 0    | 0    |
| 6.355  | J BIOL CHEM         | 300        | 0    | 0    | 1    | 0    | 0    | 0    | 0    | 0    | 3    |
| 5.542  | J MOL BIOL          | 300        | 0    | 0    | 0    | 0    | 0    | 0    | 0    | 1    | 3    |
| 3.075  | PHYS REV B          | 210        | 1    | 2    | 5    | 6    | 3    | 2    | 4    | 2    | 8    |
|        | ALL OTHERS (209)    | 209        | 1    | 2    | 5    | 3    | 1    | 2    | 3    | 0    | 8    |
| 3.454  | INORG CHEM          | 205        | 0    | 1    | 0    | 0    | 1    | 1    | 1    | 6    | 1    |
| 4.008  | BIOCHEMISTRY-US     | 195        | 1    | 0    | 0    | 0    | 0    | 0    | 1    | 0    | 4    |
| 2.926  | DALTON T            | 173        | 0    | 3    | 0    | 1    | 1    | 0    | 0    | 3    | 1    |
| 1.815  | J SOLID STATE CHEM  | 158        | 0    | 1    | 0    | 0    | 0    | 0    | 1    | 0    | 5    |
| 3.196  | ORGANOMETALLICS     | 152        | 0    | 0    | 0    | 0    | 0    | 0    | 0    | 0    | 1    |
| 6.903  | J AM CHEM SOC       | 142        | 1    | 1    | 3    | 0    | 4    | 1    | 2    | 2    | 4    |
| 1.554  | INORG CHIM ACTA     | 139        | 0    | 0    | 0    | 0    | 0    | 0    | 0    | 0    | 0    |
| 2.336  | EUR J INORG CHEM    | 137        | 0    | 0    | 0    | 0    | 0    | 2    | 0    | 3    | 0    |
| 1.39   | Z KRISTALLOGR       | 132        | 1    | 1    | 6    | 2    | 6    | 2    | 4    | 1    | 3    |
| 5.185  | STRUCTURE           | 119        | 0    | 0    | 1    | 0    | 0    | 0    | 1    | 1    | 0    |
| 3.534  | J APPL CRYSTALLOGR  | 115        | 4    | 6    | 13   | 5    | 1    | 3    | 3    | 4    | 8    |
| 10.452 | P NATL ACAD SCI USA | 115        | 0    | 0    | 0    | 0    | 1    | 0    | 1    | 0    | 0    |

## Acta Crystallographica Section A - citation report by issue

Special issues are shaded.

| 2003  |      |                                 |                        | 2004  |      |                                 |                        | 2005  |      |                                 |                        |
|-------|------|---------------------------------|------------------------|-------|------|---------------------------------|------------------------|-------|------|---------------------------------|------------------------|
| Issue | Part | No. of articles in ISI database | Average citation count | Issue | Part | No. of articles in ISI database | Average citation count | Issue | Part | No. of articles in ISI database | Average citation count |
| 1     | 0    | 11                              | 3.0                    | 1     | 0    | 11                              | 1.4                    | 1     | 0    | 15                              | 1.7                    |
| 2     | 0    | 14                              | 2.8                    | 2     | 0    | 13                              | 1.6                    | 2     | 0    | 11                              | 2.0                    |
| 3     | 0    | 14                              | 2.6                    | 3     | 0    | 13                              | 1.0                    | 3     | 0    | 11                              | 1.5                    |
| 4     | 0    | 11                              | 3.0                    | 4     | 0    | 11                              | 1.0                    | 4     | 0    | 12                              | 0.5                    |
| 5     | 0    | 8                               | 2.5                    | 5     | 0    | 21                              | 0.2                    | 5     | 0    | 6                               | 0.3                    |
| 6     | 0    | 8                               | 2.2                    | 6     | 0    | 18                              | 0.2                    | 6     | 0    | 8                               | 0.5                    |
|       |      |                                 |                        | a1    | 0    | 0                               | 0                      | a1    | 0    | 0                               | 0                      |

## Acta Crystallographica Section A - citation report by category

| Category                               | 2003            |                                 |                             |                        | 2004            |                                 |                             |                        | 2005            |                                 |                             |                        |
|----------------------------------------|-----------------|---------------------------------|-----------------------------|------------------------|-----------------|---------------------------------|-----------------------------|------------------------|-----------------|---------------------------------|-----------------------------|------------------------|
|                                        | No. of articles | No. of articles in ISI database | No. of articles not covered | Average citation count | No. of articles | No. of articles in ISI database | No. of articles not covered | Average citation count | No. of articles | No. of articles in ISI database | No. of articles not covered | Average citation count |
| research papers                        | 58              | 58                              | 0                           | 3.0                    | 76              | 76                              | 0                           | 0.8                    | 45              | 45                              | 0                           | 0.9                    |
| short communications                   | 6               | 6                               | 0                           | 0.8                    | 6               | 6                               | 0                           | 0.7                    | 5               | 5                               | 0                           | 0.2                    |
| letters to the editor                  | 0               | 0                               | 0                           | 0.0                    | 1               | 1                               | 0                           | 0.0                    | 0               | 0                               | 0                           | 0.0                    |
| addenda and errata                     | 2               | 2                               | 0                           | 0.0                    | 1               | 1                               | 0                           | 0.0                    | 0               | 0                               | 0                           | 0.0                    |
| book reviews                           | 5               | 0                               | 5                           | 0.0                    | 2               | 0                               | 2                           | 0.0                    | 4               | 0                               | 4                           | 0.0                    |
| books received                         | 3               | 0                               | 3                           | 0.0                    | 4               | 0                               | 4                           | 0.0                    | 1               | 0                               | 1                           | 0.0                    |
| issue preface                          | 0               | 0                               | 0                           | 0.0                    | 1               | 0                               | 1                           | 0.0                    | 0               | 0                               | 0                           | 0.0                    |
| international union of crystallography | 5               | 0                               | 5                           | 0.0                    | 3               | 0                               | 3                           | 0.0                    | 5               | 0                               | 5                           | 0.0                    |
| obituaries                             | 0               | 0                               | 0                           | 0.0                    | 0               | 0                               | 0                           | 0.0                    | 2               | 1                               | 1                           | 0.0                    |
| abstract                               | 0               | 0                               | 0                           | 0.0                    | 612             | 0                               | 612                         | 0.0                    | 2055            | 0                               | 2055                        | 0.0                    |

## Highly cited papers

| Acta Crystallographica Section A - 2001 |      |            |                 |               |                              |                                                                        |                                                                                                                      |
|-----------------------------------------|------|------------|-----------------|---------------|------------------------------|------------------------------------------------------------------------|----------------------------------------------------------------------------------------------------------------------|
| Issue                                   | Part | First page | Paper category  | ISI citations | Total IUCr citations to date | Authors                                                                | Title                                                                                                                |
| 5                                       | 0    | 576        | research papers | 18            | 1                            | <b>Takakura, H.</b> , Yamamoto, A., Tsai, A.P.                         | The structure of a decagonal Al <sub>72</sub> Ni <sub>20</sub> Co <sub>8</sub> quasicrystal                          |
| 6                                       | 0    | 663        | research papers | 12            | 2                            | <b>Kirfel, A.</b> , Krane, H.-G., Blaha, P., Schwarz, K., Lippmann, T. | Electron-density distribution in stishovite, SiO <sub>2</sub> : a new high-energy synchrotron-radiation study        |
| 3                                       | 0    | 272        | research papers | 10            | 7                            | Volkov, A., Abramov, Y.A., <b>Coppens, P.</b>                          | Density-optimized radial exponents for X-ray charge-density refinement from ab initio crystal calculations           |
| 1                                       | 0    | 40         | research papers | 10            | 11                           | <b>Giacovazzo, C.</b> , Siliqi, D.                                     | The method of joint probability distribution functions applied to the one-wavelength anomalous-scattering (OAS) case |
| 2                                       | 0    | 176        | research papers | 9             | 6                            | <b>Sowa, H.</b>                                                        | On the transition from the wurtzite to the NaCl type                                                                 |

| Acta Crystallographica Section A - 2002 |      |            |                 |               |                              |                                                                                                                                         |                                                                                                  |
|-----------------------------------------|------|------------|-----------------|---------------|------------------------------|-----------------------------------------------------------------------------------------------------------------------------------------|--------------------------------------------------------------------------------------------------|
| Issue                                   | Part | First page | Paper category  | ISI citations | Total IUCr citations to date | Authors                                                                                                                                 | Title                                                                                            |
| 2                                       | 0    | 133        | research papers | 21            | 6                            | Kim, C.D., Pillet, S., Wu, G., Fullagar, W.K., <b>Coppens, P.</b>                                                                       | Excited-state structure by time-resolved X-ray diffraction                                       |
| 2                                       | 0    | 190        | research papers | 10            | 6                            | <b>Scardi, P.</b> , Leoni, M.                                                                                                           | Whole powder pattern modelling                                                                   |
| 2                                       | 0    | 180        | research papers | 5             | 3                            | Cervellino, A., <b>Steurer, W.</b>                                                                                                      | General periodic average structures of decagonal quasicrystals                                   |
| 1                                       | 0    | 33         | research papers | 5             | 5                            | Chao, C.-H., Hung, C.-Y., Huang, Y.-S., Ching, C.-H., Lee, Y.-R., Jean, Y.-C., Lai, S.-C., Stetsko, Y.P., Yuan, H., <b>Chang, S.-L.</b> | Multiple diffraction data analysis for macromolecular crystals in stereoscopic multibeam imaging |
| 4                                       | 0    | 346        | research papers | 5             | 1                            | <b>Wooten, F.</b>                                                                                                                       | Structure, odd lines and topological entropy of disorder of amorphous silicon                    |

| Acta Crystallographica Section A - 2003 |      |            |                 |               |                              |                                                                                                           |                                                                                                                                    |
|-----------------------------------------|------|------------|-----------------|---------------|------------------------------|-----------------------------------------------------------------------------------------------------------|------------------------------------------------------------------------------------------------------------------------------------|
| Issue                                   | Part | First page | Paper category  | ISI citations | Total IUCr citations to date | Authors                                                                                                   | Title                                                                                                                              |
| 2                                       | 0    | 143        | research papers | 20            | 6                            | He, H., Marchesini, S., Howells, M., Weierstall, U., Hembree, G., <b>Spence, J.C.H.</b>                   | Experimental lensless soft-X-ray imaging using iterative algorithms: phasing diffuse scattering                                    |
| 1                                       | 0    | 22         | research papers | 18            | 4                            | Delgado Friedrichs, O., <b>O'Keeffe, M.</b> , Yaghi, O.M.                                                 | Three-periodic nets and tilings: regular and quasiregular nets                                                                     |
| 4                                       | 0    | 327        | research papers | 10            | 10                           | Olczak, A., Cianci, M., Hao, Q., Rizkallah, P.J., Raftery, J., <b>Helliwell, J.R.</b>                     | S-SWAT (softer single-wavelength anomalous technique): potential in high-throughput protein crystallography                        |
| 5                                       | 0    | 437        | research papers | 9             | 3                            | <b>Lippmann, T.</b> , Blaha, P., Andersen, N.H., Poulsen, H.F., Wolf, T., Schneider, J.R., Schwarz, K.-H. | Charge-density analysis of YBa <sub>2</sub> Cu <sub>3</sub> O <sub>6.98</sub> . Comparison of theoretical and experimental results |
| 5                                       | 0    | 459        | research papers | 9             | 2                            | <b>Smaalen, S. van</b> , Palatinus, L., Schneider, M.                                                     | The maximum-entropy method in superspace                                                                                           |

| Acta Crystallographica Section A - 2004 |      |            |                      |               |                              |                                                               |                                                                                                                                       |
|-----------------------------------------|------|------------|----------------------|---------------|------------------------------|---------------------------------------------------------------|---------------------------------------------------------------------------------------------------------------------------------------|
| Issue                                   | Part | First page | Paper category       | ISI citations | Total IUCr citations to date | Authors                                                       | Title                                                                                                                                 |
| 2                                       | 0    | 134        | research papers      | 7             | 6                            | <b>Oszlanyi, G.</b> , Suto, A.                                | Ab initio structure solution by charge flipping                                                                                       |
| 2                                       | 0    | 198        | short communications | 4             | 5                            | <b>Janner, A.</b>                                             | Integral lattices                                                                                                                     |
| 3                                       | 0    | 204        | research papers      | 4             | 1                            | Pichon-Pesme, V., Jelsch, C., Guillot, B., <b>Lecomte, C.</b> | A comparison between experimental and theoretical aspherical-atom scattering factors for charge-density refinement of large molecules |
| 4                                       | 0    | 326        | research papers      | 4             | 3                            | <b>Wu, J.S.</b> , Spence, J.C.H., O'Keeffe, M., Groy, T.L.    | Application of a modified Oszlanyi and Suto ab initio charge-flipping algorithm to experimental data                                  |
| 1                                       | 0    | 40         | research papers      | 3             | 2                            | <b>Mana, G.</b> , Montanari, F.                               | A Fourier optics approach to the dynamical theory of X-ray diffraction - perfect crystals                                             |
| 2                                       | 0    | 158        | research papers      | 3             | 4                            | <b>Sowa, H.</b> , Koch, E.                                    | Hexagonal and trigonal sphere packings. II. Bivariant lattice complexes                                                               |
| 3                                       | 0    | 239        | research papers      | 3             | 4                            | <b>Koch, E.</b> , Sowa, H.                                    | Exceptional properties of some sphere packings in the general position of P6222                                                       |
| 3                                       | 0    | 246        | research papers      | 3             | 4                            | <b>Fischer, W.</b>                                            | Minimal densities of cubic sphere-packing types                                                                                       |
| 1                                       | 0    | 89         | research papers      | 3             | 0                            | <b>Nespolo, M.</b> , Ferraris, G.                             | Applied geminography - symmetry analysis of twinned crystals and definition of twinning by reticular polyholohedry                    |
| 2                                       | 0    | 167        | research papers      | 3             | 1                            | <b>Lifshitz, R.</b> , Even-Dar Mandel, S.                     | Magnetically ordered quasicrystals: enumeration of spin groups and calculation of magnetic selection rules                            |

| Acta Crystallographica Section A - 2005 |      |            |                 |               |                              |                                                                                                  |                                                                                                                                                                                                                                                                                                                                                                                                                                                        |
|-----------------------------------------|------|------------|-----------------|---------------|------------------------------|--------------------------------------------------------------------------------------------------|--------------------------------------------------------------------------------------------------------------------------------------------------------------------------------------------------------------------------------------------------------------------------------------------------------------------------------------------------------------------------------------------------------------------------------------------------------|
| Issue                                   | Part | First page | Paper category  | ISI citations | Total IUCr citations to date | Authors                                                                                          | Title                                                                                                                                                                                                                                                                                                                                                                                                                                                  |
| 2                                       | 0    | 162        | topical reviews | 11            | 2                            | <b>Coppens, P.</b> , Vorontsov, I.I., Graber, T., Gembicky, M., Kovalevsky, A.Y.                 | The structure of short-lived excited states of molecular complexes by time-resolved X-ray diffraction                                                                                                                                                                                                                                                                                                                                                  |
| 3                                       | 0    | 331        | research papers | 7             | 2                            | <b>Sowa, H.</b> , Koch, E.                                                                       | Hexagonal and trigonal sphere packings. III. Trivariant lattice complexes of hexagonal space groups                                                                                                                                                                                                                                                                                                                                                    |
| 1                                       | 0    | 93         | topical reviews | 7             | 1                            | <b>Howard, C.J.</b> , Stokes, H.T.                                                               | Structures and phase transitions in perovskites - a group-theoretical approach<br>This article is dedicated to Helen D. Megaw (1907-2002), in appreciation of her many contributions to the crystallography of inorganic and mineral compounds, including her seminal studies of perovskites. Some of the material was presented by CJH in the Megaw memorial session at the 21st European Crystallography Meeting, Durban, South Africa, August 2003. |
| 3                                       | 0    | 314        | research papers | 4             | 0                            | <b>Dittrich, B.</b> , Hubschle, C.B., Messerschmidt, M., Kalinowski, R., Girnt, D., Luger, P.    | The invariom model and its application: refinement of d,l-serine at different temperatures and resolution                                                                                                                                                                                                                                                                                                                                              |
| 2                                       | 0    | 237        | research papers | 4             | 0                            | <b>Spence, J.C.H.</b> , Schmidt, K., Wu, J.S., Hembree, G., Weierstall, U., Doak, B., Fromme, P. | Diffraction and imaging from a beam of laser-aligned proteins: resolution limits                                                                                                                                                                                                                                                                                                                                                                       |
| 1                                       | 0    | 112        | topical reviews | 4             | 1                            | <b>Clegg, P.S.</b>                                                                               | X-ray studies of the phases and phase transitions of liquid crystals                                                                                                                                                                                                                                                                                                                                                                                   |
| 1                                       | 0    | 62         | topical reviews | 3             | 1                            | <b>Moret, R.</b>                                                                                 | Structures, phase transitions and orientational properties of the C60 monomer and polymers                                                                                                                                                                                                                                                                                                                                                             |

|   |   |     |                 |   |   |                                                                                                                                                |                                                            |
|---|---|-----|-----------------|---|---|------------------------------------------------------------------------------------------------------------------------------------------------|------------------------------------------------------------|
| 4 | 0 | 426 | research papers | 2 | 1 | <b>Koch, E.</b> , Sowa, H., Fischer, W.                                                                                                        | On the density of homogeneous sphere packings              |
| 4 | 0 | 435 | research papers | 2 | 1 | <b>Fischer, W.</b>                                                                                                                             | Tetragonal sphere packings: minimal densities and subunits |
| 6 | 0 | 575 | research papers | 2 | 0 | <b>Brown, I.D.</b> , Abrahams, S.C., Berndt, M., Faber, J., Karen, V.L., Motherwell, W.D.S., Villars, P., Westbrook, J.D., <b>McMahon</b> , B. | Report of the Working Group on Crystal Phase Identifiers   |

## Background information on Section B

### Papers submitted (2000-2005)

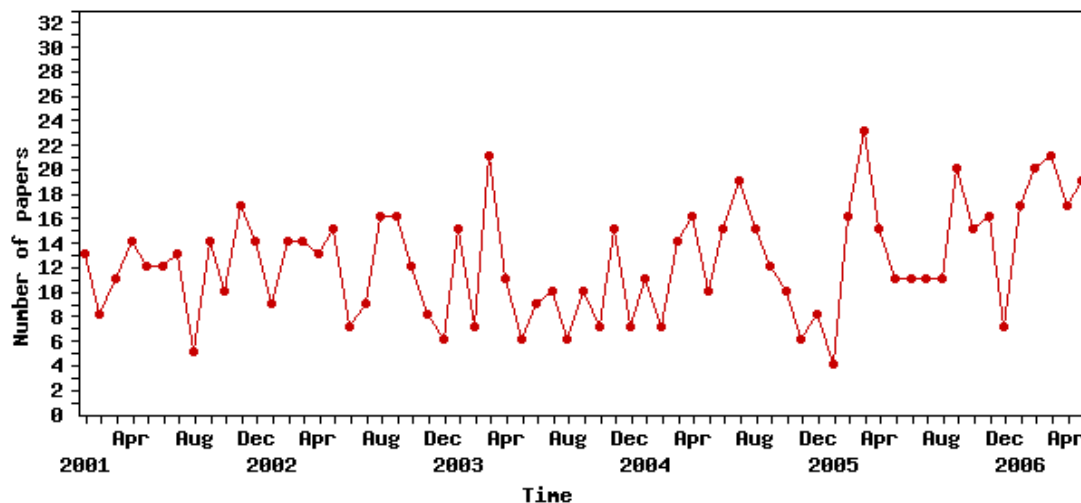

### Papers published (2000-2005)

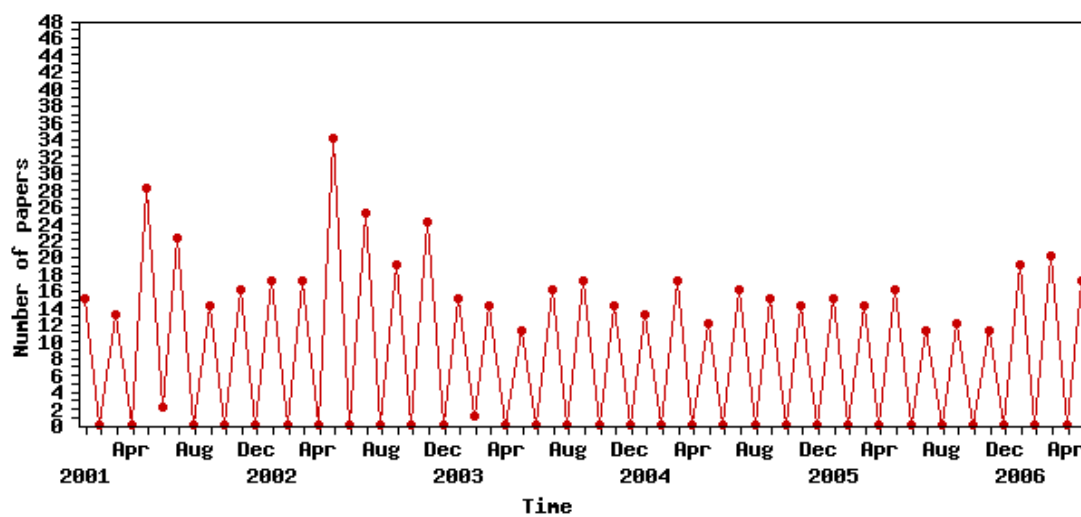

### Numbers at a glance Acta Crystallographica Section B

|                           |       |
|---------------------------|-------|
| Consortia deals           | 2541  |
| Institutional subscribers | 601   |
| Individual subscribers    | 55    |
| Impact factor (2005)      | 1.910 |
| Ranking                   | 6/24  |

## Acta Crystallographica Section B - competing journals based on citing

Number of times articles published in 2004 (in journals below) cited articles published in *Acta Crystallographica Section B*

| Impact | Citing Journal     | Cited Year |      |      |      |      |      |      |      |      |      |
|--------|--------------------|------------|------|------|------|------|------|------|------|------|------|
|        |                    | All Yrs    | 2004 | 2003 | 2002 | 2001 | 2000 | 1999 | 1998 | 1997 | 1996 |
|        | ALL JOURNALS       | 9852       | 38   | 116  | 973  | 225  | 220  | 189  | 192  | 230  | 121  |
| 0.491  | ACTA CRYSTALLOGR E | 536        | 5    | 1    | 207  | 8    | 17   | 15   | 3    | 5    | 5    |
| 0.728  | ACTA CRYSTALLOGR C | 447        | 1    | 6    | 152  | 15   | 14   | 9    | 15   | 10   | 1    |
| 1.815  | J SOLID STATE CHEM | 425        | 3    | 8    | 3    | 9    | 1    | 7    | 11   | 15   | 9    |
| 5.418  | ACTA CRYSTALLOGR B | 385        | 12   | 23   | 64   | 27   | 26   | 16   | 14   | 16   | 4    |
| 3.454  | INORG CHEM         | 285        | 0    | 0    | 21   | 5    | 1    | 1    | 1    | 2    | 3    |
| 6.903  | J AM CHEM SOC      | 223        | 1    | 2    | 22   | 6    | 5    | 2    | 3    | 9    | 5    |
| 3.075  | PHYS REV B         | 212        | 0    | 2    | 3    | 5    | 2    | 5    | 5    | 10   | 2    |
| 3.834  | J PHYS CHEM B      | 189        | 0    | 0    | 9    | 4    | 5    | 4    | 2    | 3    | 0    |
|        | ALL OTHERS (178)   | 178        | 1    | 6    | 7    | 3    | 1    | 6    | 2    | 1    | 1    |
| 1.2    | J MOL STRUCT       | 166        | 0    | 0    | 6    | 4    | 5    | 2    | 2    | 5    | 0    |
| 1.086  | Z ANORG ALLG CHEM  | 165        | 0    | 1    | 8    | 4    | 2    | 1    | 2    | 3    | 3    |
| 1.39   | Z KRISTALLOGR      | 146        | 0    | 2    | 11   | 4    | 5    | 5    | 6    | 3    | 0    |
| 2.639  | J PHYS CHEM A      | 143        | 1    | 1    | 9    | 5    | 6    | 2    | 3    | 1    | 2    |
| 2.856  | CRYST GROWTH DES   | 140        | 0    | 4    | 21   | 7    | 7    | 4    | 3    | 5    | 2    |
| 1.554  | INORG CHIM ACTA    | 133        | 0    | 0    | 12   | 2    | 5    | 0    | 1    | 1    | 0    |
| 4.103  | CHEM MATER         | 132        | 0    | 2    | 4    | 4    | 2    | 4    | 4    | 5    | 1    |
| 1.562  | J ALLOY COMPD      | 128        | 0    | 0    | 1    | 2    | 2    | 1    | 2    | 0    | 1    |
| 2.926  | DALTON T           | 127        | 1    | 0    | 20   | 5    | 0    | 4    | 1    | 4    | 1    |
| 4.517  | CHEM-EUR J         | 115        | 0    | 2    | 13   | 3    | 5    | 1    | 2    | 5    | 2    |
| 2.596  | CRYSTENGGCOMM      | 115        | 0    | 3    | 21   | 5    | 9    | 5    | 2    | 6    | 1    |

## Acta Crystallographica Section B - citation report by issue

Special issues are shaded.

| 2003  |      |                                 |                        | 2004  |      |                                 |                        | 2005  |      |                                 |                        |
|-------|------|---------------------------------|------------------------|-------|------|---------------------------------|------------------------|-------|------|---------------------------------|------------------------|
| Issue | Part | No. of articles in ISI database | Average citation count | Issue | Part | No. of articles in ISI database | Average citation count | Issue | Part | No. of articles in ISI database | Average citation count |
| 1     | 0    | 16                              | 3.9                    | 1     | 0    | 12                              | 1.6                    | 1     | 0    | 14                              | 2.4                    |
| 2     | 0    | 13                              | 2.7                    | 2     | 0    | 17                              | 2.0                    | 2     | 0    | 14                              | 1.0                    |
| 3     | 0    | 11                              | 2.1                    | 3     | 0    | 12                              | 1.3                    | 3     | 0    | 16                              | 0.6                    |
| 4     | 0    | 14                              | 3.3                    | 4     | 0    | 16                              | 0.5                    | 4     | 0    | 13                              | 1.3                    |
| 5     | 0    | 17                              | 1.8                    | 5     | 0    | 15                              | 0.5                    | 5     | 0    | 15                              | 1.0                    |
| 6     | 0    | 14                              | 1.9                    | 6     | 0    | 14                              | 0.4                    | 6     | 0    | 14                              | 0.6                    |

## Acta Crystallographica Section B - citation report by category

| Category                               | 2003            |                                 |                             |                        | 2004            |                                 |                             |                        | 2005            |                                 |                             |                        |
|----------------------------------------|-----------------|---------------------------------|-----------------------------|------------------------|-----------------|---------------------------------|-----------------------------|------------------------|-----------------|---------------------------------|-----------------------------|------------------------|
|                                        | No. of articles | No. of articles in ISI database | No. of articles not covered | Average citation count | No. of articles | No. of articles in ISI database | No. of articles not covered | Average citation count | No. of articles | No. of articles in ISI database | No. of articles not covered | Average citation count |
| research papers                        | 78              | 78                              | 0                           | 2.7                    | 81              | 81                              | 0                           | 1.0                    | 84              | 84                              | 0                           | 1.1                    |
| short communications                   | 4               | 4                               | 0                           | 1.8                    | 2               | 2                               | 0                           | 5.0                    | 1               | 1                               | 0                           | 0.0                    |
| letters to the editor                  | 0               | 0                               | 0                           | 0.0                    | 0               | 0                               | 0                           | 0.0                    | 1               | 1                               | 0                           | 1.0                    |
| addenda and errata                     | 3               | 3                               | 0                           | 1.0                    | 2               | 2                               | 0                           | 0.5                    | 0               | 0                               | 0                           | 0.0                    |
| book reviews                           | 1               | 0                               | 1                           | 0.0                    | 0               | 0                               | 0                           | 0.0                    | 0               | 0                               | 0                           | 0.0                    |
| books received                         | 1               | 0                               | 1                           | 0.0                    | 0               | 0                               | 0                           | 0.0                    | 0               | 0                               | 0                           | 0.0                    |
| international union of crystallography | 1               | 0                               | 1                           | 0.0                    | 1               | 0                               | 1                           | 0.0                    | 1               | 0                               | 1                           | 0.0                    |

## Highly cited papers

| Acta Crystallographica Section B - 2001 |      |            |                      |               |                              |                                                                                                                              |                                                                                                                                                                                 |
|-----------------------------------------|------|------------|----------------------|---------------|------------------------------|------------------------------------------------------------------------------------------------------------------------------|---------------------------------------------------------------------------------------------------------------------------------------------------------------------------------|
| Issue                                   | Part | First page | Paper category       | ISI citations | Total IUCr citations to date | Authors                                                                                                                      | Title                                                                                                                                                                           |
| 1                                       | 0    | 1          | topical reviews      | 18            | 2                            | Rao, C.N.R., Natarajan, S., Choudhury, A., Neeraj, S., Vaidhyanathan, R.                                                     | Synthons and design in metal phosphates and oxalates with open architectures                                                                                                    |
| 3                                       | 0    | 435        | research papers      | 17            | 5                            | Wilson, C.C.                                                                                                                 | Migration of the proton in the strong O-H...O hydrogen bond in urea-phosphoric acid (1/1)                                                                                       |
| 6                                       | 0    | 725        | research papers      | 17            | 5                            | Lufaso, M.W., Woodward, P.M.                                                                                                 | Prediction of the crystal structures of perovskites using the software program SPuDS                                                                                            |
| 1                                       | 0    | 103        | short communications | 15            | 3                            | Steiner, T.                                                                                                                  | Competition of hydrogen-bond acceptors for the strong carboxyl donor                                                                                                            |
| 3                                       | 0    | 317        | research papers      | 12            | 13                           | Low, J.N., Moreno Sanchez, J.M., Arranz Mascaros, P., Godino Salido, M.L., Lopez Garzon, R., Cobo Domingo, J., Glidewell, C. | Hydrated metal complexes of N-(6-amino-3,4-dihydro-3-methyl-5-nitroso-4-oxopyrimidin-2-yl)glycinate: interplay of molecular, molecular-electronic and supramolecular structures |

| Acta Crystallographica Section B - 2002 |      |            |                 |               |                              |                                                                                                                                                                                                                                                                 |                                                                                                                                     |
|-----------------------------------------|------|------------|-----------------|---------------|------------------------------|-----------------------------------------------------------------------------------------------------------------------------------------------------------------------------------------------------------------------------------------------------------------|-------------------------------------------------------------------------------------------------------------------------------------|
| Issue                                   | Part | First page | Paper category  | ISI citations | Total IUCr citations to date | Authors                                                                                                                                                                                                                                                         | Title                                                                                                                               |
| 3                                       | 1    | 380        | research papers | 496           | 800                          | Allen, F.H.                                                                                                                                                                                                                                                     | The Cambridge Structural Database: a quarter of a million crystal structures and rising                                             |
| 3                                       | 1    | 389        | research papers | 73            | 130                          | Bruno, I.J., Cole, J.C., Edgington, P.R., Kessler, M., Macrae, C.F., McCabe, P., Pearson, J., Taylor, R.                                                                                                                                                        | New software for searching the Cambridge Structural Database and visualizing crystal structures                                     |
| 4                                       | 0    | 647        | research papers | 31            | 15                           | Motherwell, W.D.S., Ammon, H.L., Dunitz, J.D., Dzyabchenko, A., Erk, P., Gavezzotti, A., Hofmann, D.W.M., Leusen, F.J.J., Lommerse, J.P.M., Mooij, W.T.M., Price, S.L., Scheraga, H., Schweizer, B., Schmidt, M.U., Eijck, B.P. van, Verwer, P., Williams, D.E. | Crystal structure prediction of small organic molecules: a second blind test                                                        |
| 3                                       | 1    | 407        | research papers | 24            | 12                           | Allen, F.H., Motherwell, W.D.S.                                                                                                                                                                                                                                 | Applications of the Cambridge Structural Database in organic chemistry and crystal chemistry                                        |
| 2                                       | 0    | 198        | research papers | 17            | 1                            | Ilyushin, G.D., Blatov, V.A.                                                                                                                                                                                                                                    | Crystal chemistry of zirconosilicates and their analogs: topological classification of MT frameworks and suprapolyhedral invariants |

| Acta Crystallographica Section B - 2003 |      |            |                 |               |                              |                                                             |                                                                                         |
|-----------------------------------------|------|------------|-----------------|---------------|------------------------------|-------------------------------------------------------------|-----------------------------------------------------------------------------------------|
| Issue                                   | Part | First page | Paper category  | ISI citations | Total IUCr citations to date | Authors                                                     | Title                                                                                   |
| 4                                       | 0    | 463        | research papers | 22            | 3                            | Howard, C.J., Kennedy, B.J., Woodward, P.M.                 | Ordered double perovskites - a group-theoretical analysis                               |
| 1                                       | 0    | 1          | research papers | 13            | 3                            | White, T.J., Dong, Z.L.                                     | Structural derivation and crystal chemistry of apatites                                 |
| 5                                       | 0    | 634        | research papers | 11            | 7                            | Pidcock, E., Motherwell, W.D.S., Cole, J.C.                 | A database survey of molecular and crystallographic symmetry                            |
| 4                                       | 0    | 512        | research papers | 8             | 0                            | Ouvrard, C., Le Questel, J.-Y., Berthelot, M., Laurence, C. | Halogen-bond geometry: a crystallographic database investigation of dihalogen complexes |

|   |   |     |                 |   |   |                                                              |                                                                                                                                        |
|---|---|-----|-----------------|---|---|--------------------------------------------------------------|----------------------------------------------------------------------------------------------------------------------------------------|
| 1 | 0 | 100 | research papers | 8 | 4 | Bowes, K.F., Ferguson, G., Lough, A.J., <b>Glidewell, C.</b> | Salts of maleic and fumaric acids with organic polyamines: comparison of isomeric acids as building blocks in supramolecular chemistry |
|---|---|-----|-----------------|---|---|--------------------------------------------------------------|----------------------------------------------------------------------------------------------------------------------------------------|

#### Acta Crystallographica Section B - 2004

| Issue | Part | First page | Paper category       | ISI citations | Total IUCr citations to date | Authors                                                                                | Title                                                                                                                                                                                             |
|-------|------|------------|----------------------|---------------|------------------------------|----------------------------------------------------------------------------------------|---------------------------------------------------------------------------------------------------------------------------------------------------------------------------------------------------|
| 2     | 0    | 174        | research papers      | 8             | 5                            | <b>Trzesowska, A.</b> , Kruszynski, R., Bartczak, T.J.                                 | New bond-valence parameters for lanthanides                                                                                                                                                       |
| 1     | 0    | 41         | research papers      | 6             | 0                            | Money, V.A., Radosavljevic Evans, I., Elhaik, J., Halcrow, M.A., <b>Howard, J.A.K.</b> | An X-ray powder diffraction study of the spin-crossover transition and structure of bis(2,6-dipyrazol-1-ylpyrazine)iron(II) perchlorate                                                           |
| 2     | 0    | 249        | short communications | 5             | 4                            | <b>Howard, C.J.</b> , Zhang, Z.                                                        | Structure for perovskites with layered ordering of A-site cations                                                                                                                                 |
| 2     | 0    | 252        | short communications | 5             | 2                            | <b>Marsh, R.E.</b>                                                                     | Space group Cc: an update                                                                                                                                                                         |
| 2     | 0    | 184        | research papers      | 4             | 1                            | Scheins, S., Dittrich, B., Messerschmidt, M., Paulmann, C., <b>Luger, P.</b>           | Atomic volumes and charges in a system with a strong hydrogen bond: l-tryptophan formic acid                                                                                                      |
| 3     | 0    | 263        | research papers      | 4             | 0                            | Zhao, J., Ross, N.L., <b>Angel, R.J.</b>                                               | New view of the high-pressure behaviour of <a href="#">GdFeO<sub>3</sub></a> -type perovskites                                                                                                    |
| 3     | 0    | 315        | research papers      | 3             | 3                            | <b>Fernandes, M.A.</b> , <b>Levendis, D.C.</b>                                         | Photodimerization of the [alpha]-polymorph of ortho-ethoxy-trans-cinnamic acid in the solid state. I. Monitoring the reaction at 293 K                                                            |
| 2     | 0    | 163        | research papers      | 3             | 0                            | Yogev-Einot, D., <b>Avnir, D.</b>                                                      | Pressure and temperature effects on the degree of symmetry and chirality of the molecular building blocks of low quartz                                                                           |
| 3     | 0    | 272        | research papers      | 3             | 0                            | <b>Cerny, R.</b> , Renaudin, G., Favre-Nicolin, V., Hlukhy, V., Pottgen, R.            | Mg <sub>1</sub> + xIr <sub>1-x</sub> (x = 0, 0.037 and 0.054), a binary intermetallic compound with a new orthorhombic structure type determined from powder and single-crystal X-ray diffraction |
| 1     | 0    | 108        | research papers      | 3             | 1                            | <b>Schonleber, A.</b> , Chapuis, G.                                                    | Quininium (R)-mandelate, a structure with large Z' described as an incommensurately modulated structure in (3+1)-dimensional superspace                                                           |
| 4     | 0    | 472        | research papers      | 3             | 5                            | <b>Glidewell, C.</b> , Low, J.N., Skakle, J.M.S., Wardell, S.M.S.V., Wardell, J.L.     | Isomeric iodo-N-(nitrobenzyl)anilines: interplay of hard and soft hydrogen bonds, iodo...nitro interactions and aromatic [pi]...[pi] stacking interactions                                        |
| 1     | 0    | 10         | research papers      | 3             | 1                            | Lufaso, M.W., <b>Woodward, P.M.</b>                                                    | Jahn-Teller distortions, cation ordering and octahedral tilting in perovskites                                                                                                                    |

#### Acta Crystallographica Section B - 2005

| Issue | Part | First page | Paper category  | ISI citations | Total IUCr citations to date | Authors                                                                                                                                                                                                                                                                                                                                                                                                                       | Title                                                                                                         |
|-------|------|------------|-----------------|---------------|------------------------------|-------------------------------------------------------------------------------------------------------------------------------------------------------------------------------------------------------------------------------------------------------------------------------------------------------------------------------------------------------------------------------------------------------------------------------|---------------------------------------------------------------------------------------------------------------|
| 1     | 0    | 58         | research papers | 10            | 2                            | Moggach, S.A., Allan, D.R., Morrison, C.A., <b>Parsons, S.</b> , Sawyer, L.                                                                                                                                                                                                                                                                                                                                                   | Effect of pressure on the crystal structure of l-serine-I and the crystal structure of l-serine-II at 5.4 GPa |
| 5     | 0    | 511        | research papers | 8             | 2                            | <b>Day, G.M.</b> , Motherwell, W.D.S., Ammon, H.L., Boerrigter, S.X.M., Della Valle, R.G., Venuti, E., Dzyabchenko, A., Dunitz, J.D., Schweizer, B., van Eijck, B.P., Erk, P., Facelli, J.C., Bazterra, V.E., Ferraro, M.B., Hofmann, D.W.M., Leusen, F.J.J., Liang, C., Pantelides, C.C., Karamertzanis, P.G., Price, S.L., Lewis, T.C., Nowell, H., Torrisi, A., Scheraga, H.A., Arnautova, Y.A., Schmidt, M.U., Verwer, P. | A third blind test of crystal structure prediction                                                            |
| 1     | 0    | 69         | research papers | 7             | 4                            | Oswald, I.D.H., Allan, D.R., Motherwell, W.D.S., <b>Parsons, S.</b>                                                                                                                                                                                                                                                                                                                                                           | Structures of the monofluoro- and monochlorophenols at low temperature and high pressure                      |
| 4     | 0    | 464        | research papers | 4             | 2                            | Nichol, G.S., <b>Clegg, W.</b>                                                                                                                                                                                                                                                                                                                                                                                                | A variable-temperature study of a phase transition in barbituric acid dihydrate                               |

|   |   |     |                 |   |   |                                                                                                             |                                                                                                                                                                                     |
|---|---|-----|-----------------|---|---|-------------------------------------------------------------------------------------------------------------|-------------------------------------------------------------------------------------------------------------------------------------------------------------------------------------|
| 1 | 0 | 25  | research papers | 4 | 0 | Marchivie, M., <b>Guionneau, P.</b> , Letard, J.-F., Chasseau, D.                                           | Photo-induced spin-transition: the role of the iron(II) environment distortion                                                                                                      |
| 1 | 0 | 29  | research papers | 4 | 3 | Willighagen, E.L., Wehrens, R., Verwer, P., de Gelder, R., <b>Buydens, L.M.C.</b>                           | Method for the computational comparison of crystal structures                                                                                                                       |
| 4 | 0 | 387 | research papers | 4 | 1 | <b>Woodward, D.I.</b> , Reaney, I.M.                                                                        | Electron diffraction of tilted perovskites                                                                                                                                          |
| 4 | 0 | 449 | research papers | 3 | 2 | McGregor, P.A., <b>Allan, D.R.</b> , Parsons, S., Pulham, C.R.                                              | The low-temperature and high-pressure crystal structures of cyclobutanol (C4H7OH)                                                                                                   |
| 2 | 0 | 164 | research papers | 3 | 0 | <b>Peresypkina, E.V.</b> , Bushuev, M.B., Virovets, A.V., Krivopalov, V.P., Lavrenova, L.G., Larionov, S.V. | Three differently coloured concomitant polymorphs: synthesis, structure and packing analysis of (4-(3',5'-dimethyl-1H-pyrazol-1'-yl)-6-methyl-2-phenylpyrimidine)dichlorocopper(II) |
| 6 | 0 | 635 | research papers | 2 | 0 | <b>Mercier, P.H.J.</b> , Le Page, Y., Whitfield, P.S., Mitchell, L.D., Davidson, I.J., White, T.J.          | Geometrical parameterization of the crystal chemistry of P63/m apatites: comparison with experimental data and ab initio results                                                    |

## Background information on Section C

### Papers submitted (2000-2005)

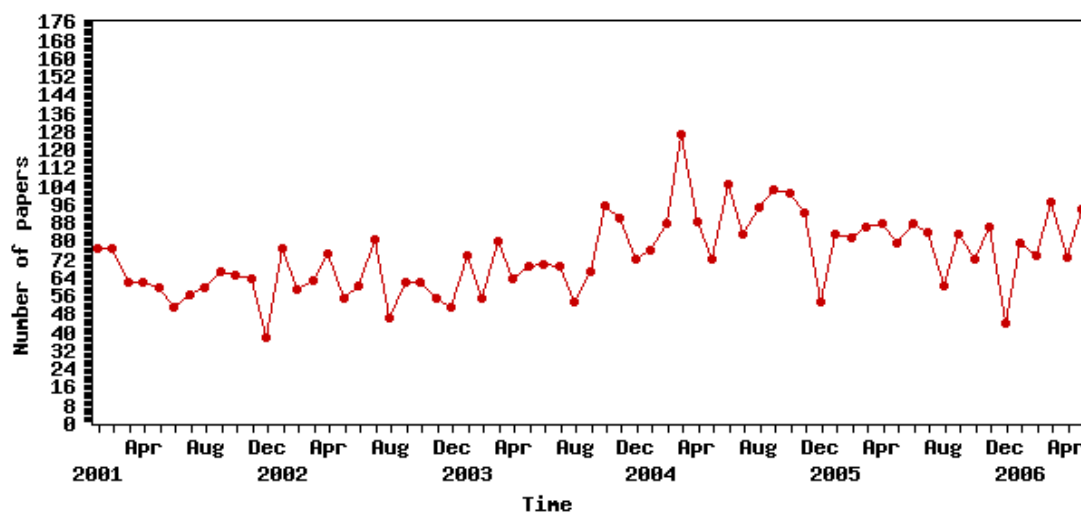

### Papers published (2000-2005)

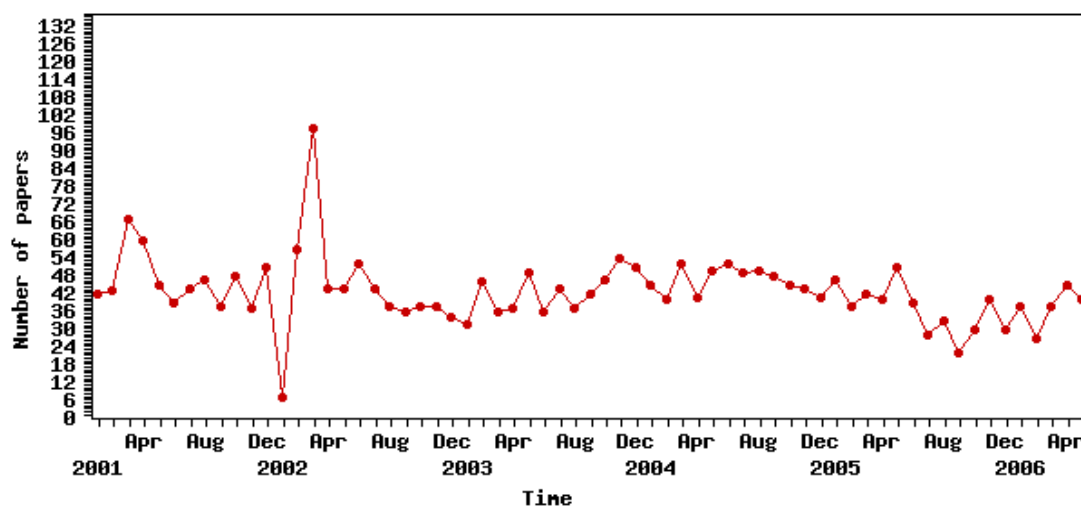

### Numbers at a glance Acta Crystallographica Section C

|                           |       |
|---------------------------|-------|
| Consortia deals           | 2545  |
| Institutional subscribers | 579   |
| Individual subscribers    | 39    |
| Impact factor (2005)      | 0.777 |
| Ranking (2005)            | 16/24 |

### Acta Crystallographica Section C - competing journals based on citing

Number of times articles published in 2004 (in journals below) cited articles published in *Acta Crystallographica Section C*

| Impact | Citing Journal       | Cited Year |      |      |      |      |      |      |      |      |      |
|--------|----------------------|------------|------|------|------|------|------|------|------|------|------|
|        |                      | All Yrs    | 2004 | 2003 | 2002 | 2001 | 2000 | 1999 | 1998 | 1997 | 1996 |
|        | ALL JOURNALS         | 6751       | 158  | 325  | 410  | 332  | 461  | 504  | 364  | 321  | 384  |
| 0.491  | ACTA CRYSTALLOGR E   | 1015       | 68   | 72   | 59   | 54   | 76   | 125  | 54   | 56   | 73   |
| 0.728  | ACTA CRYSTALLOGR C   | 694        | 64   | 105  | 88   | 56   | 48   | 43   | 39   | 29   | 34   |
| 3.454  | INORG CHEM           | 255        | 1    | 5    | 12   | 8    | 16   | 23   | 11   | 8    | 15   |
| 1.554  | INORG CHIM ACTA      | 229        | 1    | 4    | 16   | 6    | 20   | 17   | 18   | 10   | 13   |
| 2.926  | DALTON T             | 204        | 0    | 12   | 6    | 5    | 13   | 13   | 5    | 9    | 13   |
| 1.586  | POLYHEDRON           | 167        | 1    | 7    | 10   | 5    | 14   | 12   | 15   | 10   | 9    |
| 1.086  | Z ANORG ALLG CHEM    | 159        | 1    | 2    | 11   | 4    | 6    | 8    | 4    | 9    | 7    |
| 1.2    | J MOL STRUCT         | 143        | 4    | 6    | 11   | 12   | 9    | 14   | 9    | 9    | 13   |
| 2.336  | EUR J INORG CHEM     | 142        | 1    | 7    | 16   | 5    | 9    | 7    | 9    | 2    | 5    |
| 0.512  | J CHEM CRYSTALLOGR   | 121        | 0    | 3    | 4    | 5    | 8    | 11   | 6    | 5    | 10   |
| 1.815  | J SOLID STATE CHEM   | 113        | 0    | 2    | 6    | 6    | 2    | 7    | 5    | 4    | 4    |
| 6.903  | J AM CHEM SOC        | 109        | 0    | 0    | 1    | 6    | 11   | 3    | 6    | 9    | 4    |
|        | ALL OTHERS (109)     | 109        | 0    | 2    | 6    | 13   | 5    | 2    | 7    | 2    | 7    |
| 5.418  | ACTA CRYSTALLOGR B   | 102        | 3    | 5    | 12   | 12   | 7    | 6    | 3    | 3    | 4    |
| 0.647  | Z NATURFORSCH B      | 87         | 1    | 4    | 8    | 6    | 8    | 5    | 5    | 4    | 2    |
| 0.847  | J COORD CHEM         | 84         | 1    | 3    | 2    | 1    | 7    | 14   | 4    | 5    | 7    |
| 0.33   | Z KRIST-NEW CRYST ST | 79         | 4    | 3    | 6    | 1    | 33   | 2    | 3    | 4    | 5    |
| 1.905  | J ORGANOMET CHEM     | 78         | 0    | 0    | 6    | 3    | 6    | 5    | 5    | 4    | 5    |
| 1.682  | INORG CHEM COMMUN    | 76         | 2    | 6    | 6    | 2    | 7    | 9    | 3    | 2    | 2    |
| 20.233 | CHEM REV             | 72         | 0    | 1    | 1    | 1    | 4    | 4    | 2    | 3    | 1    |

### Acta Crystallographica Section C - citation report by issue

| 2003  |      |                                 |                        | 2004  |      |                                 |                        | 2005  |      |                                 |                        |
|-------|------|---------------------------------|------------------------|-------|------|---------------------------------|------------------------|-------|------|---------------------------------|------------------------|
| Issue | Part | No. of articles in ISI database | Average citation count | Issue | Part | No. of articles in ISI database | Average citation count | Issue | Part | No. of articles in ISI database | Average citation count |
| 1     | 0    | 32                              | 1.4                    | 1     | 0    | 48                              | 0.9                    | 1     | 0    | 41                              | 1.6                    |
| 2     | 0    | 31                              | 1.2                    | 2     | 0    | 44                              | 0.8                    | 2     | 0    | 44                              | 0.9                    |
| 3     | 0    | 45                              | 1.5                    | 3     | 0    | 39                              | 0.8                    | 3     | 0    | 37                              | 0.6                    |
| 4     | 0    | 35                              | 1.2                    | 4     | 0    | 51                              | 0.8                    | 4     | 0    | 41                              | 0.9                    |
| 5     | 0    | 36                              | 1.2                    | 5     | 0    | 40                              | 0.5                    | 5     | 0    | 39                              | 0.7                    |
| 6     | 0    | 48                              | 1.2                    | 6     | 0    | 49                              | 0.4                    | 6     | 0    | 50                              | 0.7                    |
| 7     | 0    | 35                              | 0.4                    | 7     | 0    | 54                              | 0.7                    | 7     | 0    | 38                              | 0.9                    |
| 8     | 0    | 43                              | 0.7                    | 8     | 0    | 45                              | 0.5                    | 8     | 0    | 27                              | 0.8                    |
| 9     | 0    | 36                              | 0.8                    | 9     | 0    | 49                              | 0.4                    | 9     | 0    | 32                              | 0.8                    |
| 10    | 0    | 41                              | 0.9                    | 10    | 0    | 47                              | 0.3                    | 10    | 0    | 21                              | 0.8                    |
| 11    | 0    | 46                              | 1.3                    | 11    | 0    | 44                              | 0.2                    | 11    | 0    | 29                              | 0.1                    |
| 12    | 0    | 53                              | 1.0                    | 12    | 0    | 0                               | 0                      | 12    | 0    | 39                              | 0.3                    |

### Acta Crystallographica Section C - citation report by category

| Category                               | 2003            |                                 |                             |                        | 2004            |                                 |                             |                        | 2005            |                                 |                             |                        |
|----------------------------------------|-----------------|---------------------------------|-----------------------------|------------------------|-----------------|---------------------------------|-----------------------------|------------------------|-----------------|---------------------------------|-----------------------------|------------------------|
|                                        | No. of articles | No. of articles in ISI database | No. of articles not covered | Average citation count | No. of articles | No. of articles in ISI database | No. of articles not covered | Average citation count | No. of articles | No. of articles in ISI database | No. of articles not covered | Average citation count |
| inorganic compounds                    | 49              | 49                              | 0                           | 0.5                    | 41              | 38                              | 3                           | 0.5                    | 45              | 45                              | 0                           | 0.4                    |
| organic compounds                      | 243             | 243                             | 0                           | 1.0                    | 285             | 267                             | 18                          | 0.5                    | 219             | 219                             | 0                           | 0.6                    |
| metal-organic compounds                | 186             | 186                             | 0                           | 1.3                    | 227             | 205                             | 22                          | 0.7                    | 173             | 173                             | 0                           | 1.1                    |
| addenda and errata                     | 2               | 2                               | 0                           | 0.0                    | 0               | 0                               | 0                           | 0.0                    | 0               | 0                               | 0                           | 0.0                    |
| editorial                              | 1               | 1                               | 0                           | 0.0                    | 1               | 0                               | 1                           | 0.0                    | 1               | 1                               | 0                           | 0.0                    |
| international union of crystallography | 1               | 0                               | 1                           | 0.0                    | 1               | 0                               | 1                           | 0.0                    | 1               | 0                               | 1                           | 0.0                    |

## Highly cited papers

| Acta Crystallographica Section C - 2001 |      |            |                         |               |                              |                                                                                          |                                                          |
|-----------------------------------------|------|------------|-------------------------|---------------|------------------------------|------------------------------------------------------------------------------------------|----------------------------------------------------------|
| Issue                                   | Part | First page | Paper category          | ISI citations | Total IUCr citations to date | Authors                                                                                  | Title                                                    |
| 9                                       | 0    | 1120       | organic compounds       | 20            | 11                           | <b>Janczak, J.</b> , Perpetuo, G.J.                                                      | Melaminium chloride hemihydrate                          |
| 8                                       | 0    | 939        | organic compounds       | 20            | 1                            | Mattheus, C.C., Dros, A.B., Baas, J., Meetsma, A., Boer, J.L. de, <b>Palstra, T.T.M.</b> | Polymorphism in pentacene                                |
| 1                                       | 0    | 123        | organic compounds       | 19            | 12                           | <b>Janczak, J.</b> , Perpetuo, G.J.                                                      | Melaminium phthalate                                     |
| 7                                       | 0    | 873        | organic compounds       | 18            | 11                           | <b>Janczak, J.</b> , Perpetuo, G.J.                                                      | Melaminium bis(4-hydroxybenzenesulfonate) dihydrate      |
| 3                                       | 0    | 271        | metal-organic compounds | 17            | 4                            | <b>Yilmaz, V.T.</b> , Andac, O., Topcu, Y., Harrison, W.T.A.                             | trans-Bis(ethanolamine-N,O)bis(saccharinato-N)copper(II) |

| Acta Crystallographica Section C - 2002 |      |            |                         |               |                              |                                                                                       |                                                                                                                                                                                                           |
|-----------------------------------------|------|------------|-------------------------|---------------|------------------------------|---------------------------------------------------------------------------------------|-----------------------------------------------------------------------------------------------------------------------------------------------------------------------------------------------------------|
| Issue                                   | Part | First page | Paper category          | ISI citations | Total IUCr citations to date | Authors                                                                               | Title                                                                                                                                                                                                     |
| 2                                       | 0    | o112       | organic compounds       | 9             | 6                            | Perpetuo, G.J., <b>Janczak, J.</b>                                                    | Melaminium acetate acetic acid solvate monohydrate                                                                                                                                                        |
| 5                                       | 0    | o289       | organic compounds       | 9             | 9                            | Low, J.N., Quesada, A., Marchal, A., Melguizo, M., Nogueras, M., <b>Glidewell, C.</b> | Hydrogen bonding in 2-amino-4,6-dimethoxypyrimidine, 2-benzylamino-4,6-bis(benzyloxy)pyrimidine and 2-amino-4,6-bis(N-pyrrolidino)pyrimidine: chains of fused rings and a centrosymmetric dimer           |
| 3                                       | 0    | m158       | metal-organic compounds | 7             | 11                           | Zhu, M.-L., Lu, L.-P., Jin, X.-L., <b>Yang, P.</b>                                    | Trichloro(1,1-dimethylbiguanidium-[bold kappa]N3)zinc(II)                                                                                                                                                 |
| 2                                       | 0    | m124       | metal-organic compounds | 7             | 5                            | <b>Kooijman, H.</b> , Spek, A.L., Albada, G.A. van, Reedijk, J.                       | catena-Poly[[dicyanamido(5,5'-dimethyl-2,2'-bipyridine-[bold kappa]2N,N')copper(II)]-[bold mu]-dicyanamido-[bold kappa]2N1:N5]                                                                            |
| 1                                       | 0    | m17        | metal-organic compounds | 7             | 3                            | Andac, O., Guney, S., Topcu, Y., <b>Yilmaz, V.T.</b> , Harrison, W.T.A.               | Bis(pyridine-2,6-dimethanol-N,O,O')cobalt(II) and -copper(II) disaccharinate dihydrate: three-dimensional structures with extensive hydrogen bonds and aromatic [bold pi]-[bold pi]-stacking interactions |

| Acta Crystallographica Section C - 2003 |      |            |                         |               |                              |                                                                     |                                                                                                                                            |
|-----------------------------------------|------|------------|-------------------------|---------------|------------------------------|---------------------------------------------------------------------|--------------------------------------------------------------------------------------------------------------------------------------------|
| Issue                                   | Part | First page | Paper category          | ISI citations | Total IUCr citations to date | Authors                                                             | Title                                                                                                                                      |
| 5                                       | 0    | o234       | organic compounds       | 14            | 4                            | Odabasoglu, M., Albayrak, C., <b>Buyukgungor, O.</b> , Goemann, H.  | 4-[(3-Chlorophenyl)diazanyl]-2-{{[tris(hydroxymethyl)methyl]aminomethylene}cyclohexa-3,5-dien-1(2H)-one                                    |
| 11                                      | 0    | o616       | organic compounds       | 13            | 2                            | Odabasoglu, M., Albayrak, C., <b>Buyukgungor, O.</b> , Lonnecke, P. | 2-{{[Tris(hydroxymethyl)methyl]aminomethylene}cyclohexa-3,5-dien-1(2H)-one and its 6-hydroxy and 6-methoxy derivatives                     |
| 12                                      | 0    | m516       | metal-organic compounds | 12            | 9                            | Ma, C.-B., Chen, F., Chen, C.-N., <b>Liu, Q.-T.</b>                 | trans-Diaquabis(1H-imidazole-4,5-dicarboxylate-[bold kappa]2N3,O4)manganese(II)                                                            |
| 11                                      | 0    | m454       | metal-organic compounds | 11            | 9                            | <b>Hu, M.-L.</b> , Xiao, H.-P., Wang, S., Li, X.-H.                 | catena-Poly[[1,10-phenanthroline-[bold kappa]2N,N')copper(II)]-[bold mu]-(dihydrogen benzene-1,2,4,5-tetracarboxylato)-[bold kappa]2O1:O4] |

|   |   |      |                         |    |   |                                                        |                                                                      |
|---|---|------|-------------------------|----|---|--------------------------------------------------------|----------------------------------------------------------------------|
| 6 | 0 | m218 | metal-organic compounds | 10 | 9 | Zhu, H.-L., Usman, A., <b>Fun, H.-K.</b> , Wang, X.-J. | Bis(2-aminopyridine-[bold kappa]N1)(benzoato-[bold kappa]O)silver(I) |
|---|---|------|-------------------------|----|---|--------------------------------------------------------|----------------------------------------------------------------------|

#### Acta Crystallographica Section C - 2004

| Issue | Part | First page | Paper category          | ISI citations | Total IUCr citations to date | Authors                                                                                                  | Title                                                                                                                                                                                                     |
|-------|------|------------|-------------------------|---------------|------------------------------|----------------------------------------------------------------------------------------------------------|-----------------------------------------------------------------------------------------------------------------------------------------------------------------------------------------------------------|
| 3     | 0    | m117       | metal-organic compounds | 9             | 8                            | You, Z.-L., Yang, L., Zou, Y., Zeng, W.-J., Liu, W.-S., Zhu, H.-L.                                       | catena-Poly[[silver(I)-[mu]-ethane-1,2-diamine-[kappa]2N:N'] 3-fluorobenzoate monohydrate]                                                                                                                |
| 1     | 0    | o65        | organic compounds       | 7             | 7                            | Vembu, N., Nallu, M., <b>Durmus, S.</b> , <b>Pazner, M.</b> , <b>Garrison, J.</b> , <b>Youngs, W.J.</b>  | 2-Chlorophenyl 3-nitrobenzenesulfonate and 2,4-dichlorophenyl 3-nitrobenzenesulfonate: supramolecular aggregation through C-H...O, [pi]-[pi] and van der Waals interactions                               |
| 4     | 0    | o248       | organic compounds       | 6             | 7                            | Vembu, N., Nallu, M., <b>Durmus, S.</b> , <b>Pazner, M.</b> , <b>Garrison, J.</b> , <b>Youngs, W.J.</b>  | Layer architecture in 4-nitrophenyl and 4-chlorophenyl 3-nitrobenzenesulfonate at 100 K                                                                                                                   |
| 3     | 0    | o211       | organic compounds       | 6             | 5                            | Janczak, J., <b>Perpetuo, G.J.</b>                                                                       | Melaminium maleate monohydrate                                                                                                                                                                            |
| 1     | 0    | m18        | metal-organic compounds | 5             | 2                            | Lu, L.-P., Zhu, M.-L., Yang, P.                                                                          | Cocrystal of the [MnIV(C <sub>2</sub> H <sub>7</sub> N <sub>5</sub> ) <sub>3</sub> ] <sup>4+</sup> ion and biguanidium: a double hydrogen-bond interaction with guanidinium-recognizing anions            |
| 1     | 0    | o54        | organic compounds       | 5             | 3                            | Du, M., <b>Zhao, X.-J.</b>                                                                               | Three-dimensional hydrogen-bonding supramolecular architecture of 2-(3-pyridinio)-5-(3-pyridyl)-1,3,4-oxadiazole perchlorate                                                                              |
| 4     | 0    | m183       | metal-organic compounds | 5             | 5                            | Liu, B.-X., Su, J.-R., Xu, D.-J.                                                                         | catena-Poly[[[aquabis(1H-benzimidazole-[kappa]N3)cadmium(II)]-[mu]-phthalato-[kappa]3O,O':O} hemihydrate]                                                                                                 |
| 4     | 0    | m170       | metal-organic compounds | 5             | 6                            | Zhu, H.-L., <b>Qiu, X.-Y.</b> , <b>Yang, S.</b> , <b>Shao, S.-C.</b> , <b>Ma, J.-L.</b> , <b>Sun, L.</b> | Bis([mu]-4-chlorobenzoato-[kappa]2O:O)bis(2-aminopyridine-[kappa]N)silver(I)                                                                                                                              |
| 7     | 0    | m320       | metal-organic compounds | 4             | 0                            | Calmuschi, B., Jonas, A.E., Englert, U.                                                                  | Diacetato-[kappa]2O-bis((S)-1-(4-fluorophenyl)ethylamine-[kappa]N)palladium(II) and di-[mu]-acetato-[kappa]4O:O'-bis{[(S)-2-(1-aminoethyl)-5-fluorophenyl-[kappa]2C1,N]palladium(II)} benzene hemisolvate |
| 6     | 0    | m231       | metal-organic compounds | 4             | 4                            | You, Z.-L., Zhu, H.-L., <b>Liu, W.-S.</b>                                                                | catena-Poly[[silver(I)-[mu]-hexane-1,6-diamine-[kappa]2N:N'] cinnamate dihydrate]                                                                                                                         |

#### Acta Crystallographica Section C - 2005

| Issue | Part | First page | Paper category          | ISI citations | Total IUCr citations to date | Authors                                          | Title                                                                                                                                                                           |
|-------|------|------------|-------------------------|---------------|------------------------------|--------------------------------------------------|---------------------------------------------------------------------------------------------------------------------------------------------------------------------------------|
| 1     | 0    | m19        | metal-organic compounds | 25            | 20                           | Li, H., Yin, K.-L., Xu, D.-J.                    | catena-Poly[[bis(1H-benzimidazole-[kappa]N3)(salicylato-[kappa]O)copper(II))-[mu]-salicylato-O,O':O}                                                                            |
| 7     | 0    | m339       | metal-organic compounds | 13            | 10                           | You, Z.-L.                                       | catena-Poly[[{4-bromo-2-[2-(dimethylamino)ethyliminomethyl]phenolato}copper(II)]-[mu]-azido]                                                                                    |
| 6     | 0    | m295       | metal-organic compounds | 11            | 9                            | You, Z.-L.                                       | catena-Poly[[[N,N'-bis(salicylidene)propane-1,3-diaminato]cobalt(III)]-[mu]-azido] and catena-poly[[[N,N'-bis(salicylidene)propane-1,3-diaminato]cobalt(III)]-[mu]-thiocyanato] |
| 8     | 0    | m383       | metal-organic compounds | 11            | 9                            | You, Z.-L.                                       | Dichloro{2-[2-(dimethylammonio)ethyliminomethyl]-4-nitrophenolato}zinc(II) in unsolvated and hemihydrate forms                                                                  |
| 9     | 0    | o568       | organic                 | 8             | 6                            | Pu, S.-Z., <b>Yang, T.-S.</b> , <b>Wang, R.-</b> | 1,2-Bis[5-(1,3-dioxolan-2-yl)-2-ethyl-3-                                                                                                                                        |

|    |   |      |                         |   |   |                                                           |                                                                                                                                                                   |
|----|---|------|-------------------------|---|---|-----------------------------------------------------------|-------------------------------------------------------------------------------------------------------------------------------------------------------------------|
|    |   |      | compounds               |   |   | <b>J., Xu, J.-K.</b>                                      | thienyl]-3,3,4,4,5,5-hexafluorocyclopent-1-ene, a photochromic dithienylethene                                                                                    |
| 10 | 0 | m456 | metal-organic compounds | 8 | 7 | You, Z.-L.                                                | catena-Poly[[[4-bromo-2-(2-pyridylmethyliminomethyl)phenolato]zinc(I I)]-[mu]-chloro]                                                                             |
| 4  | 0 | m177 | metal-organic compounds | 7 | 7 | Fan, S.-R., Cai, G.-Q., Zhu, L.-G., <b>Xiao, H.-P.</b>    | A mixed-valence CuII/CuI anion-cation complex: bis[[mu]-5-sulfosalicylato(3-)] bis[(di-2-pyridylamine)copper(II)] bis[bis(di-2-pyridylamine)copper(I)] dihydrate  |
| 7  | 0 | m359 | metal-organic compounds | 6 | 4 | You, Z.-L.                                                | Bis[[mu]-N,N'-bis(3-methylsalicylidene)propane-1,3-diaminato]dicobalt(II) 0.28-hydrate                                                                            |
| 2  | 0 | o105 | organic compounds       | 6 | 5 | Smith, G., <b>Wermuth, U.D., White, J.M.</b>              | Hydrogen bonding in 1:1 proton-transfer compounds of 5-sulfosalicylic acid with 4-X-substituted anilines (X = F, Cl or Br)                                        |
| 10 | 0 | o599 | organic compounds       | 6 | 4 | Pu, S.-Z., <b>Liu, G., Chen, B., Wang, R.-J.</b>          | 1-(2-Methyl-5-phenyl-3-thienyl)-2-(3-methyl-5-phenyl-2-thienyl)-3,3,4,4,5,5-hexafluorocyclopent-1-ene: a novel photochromic hybrid diarylethene                   |
| 2  | 0 | o88  | organic compounds       | 6 | 4 | Bialonska, A., <b>Ciunik, Z., Popek, T., Lis, T.</b>      | Cyclic water pentamers in triclinic crystals of brucinium 1-glycerate                                                                                             |
| 1  | 0 | o50  | organic compounds       | 5 | 5 | Sikorski, A., Krzyminski, K., Konitz, A., Blazejowski, J. | 2-Ethylphenyl acridine-9-carboxylate and 2,5-dimethylphenyl acridine-9-carboxylate                                                                                |
| 1  | 0 | m16  | metal-organic compounds | 5 | 4 | Su, W., <b>Bi, W.-H., Li, X., Cao, R.</b>                 | A novel three-dimensional supramolecular coordination polymer: poly[[diaquacadmium(II)-di-[mu]2-4,4'-bipyridyl-di-[mu]2-2-sulfonatobenzoato] dihydrate]           |
| 8  | 0 | m397 | metal-organic compounds | 5 | 3 | You, Z.-L., <b>Zhu, H.-L.</b>                             | A novel thiocyanate-bridged dinuclear cadmium(II) complex: di-[mu]-thiocyanato-bis((methanol){4-nitro-2-[2-(dimethylamino)ethyliminomethyl]phenolato}cadmium(II)) |

## Background information on Section D

### Papers submitted (2000-2005)

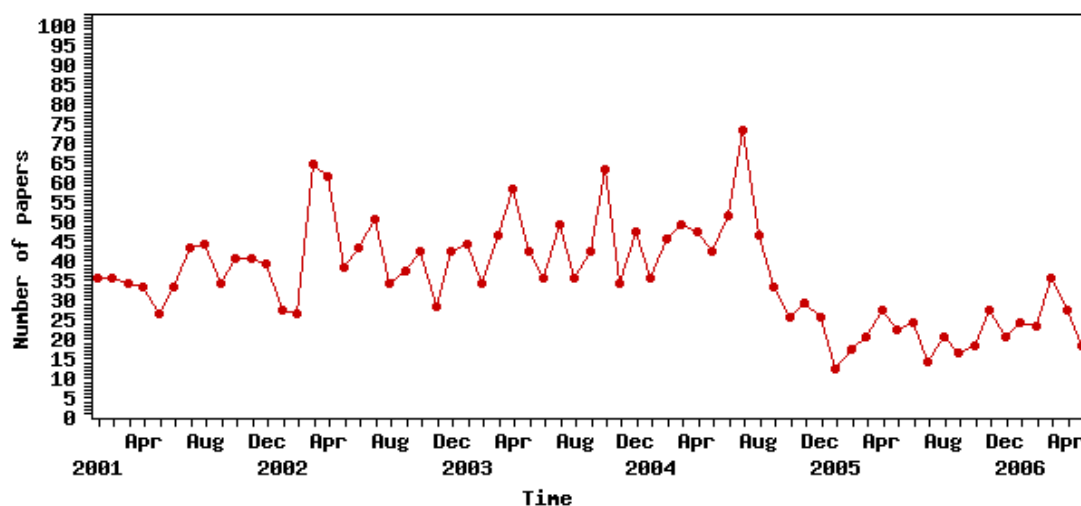

### Papers published (2000-2005)

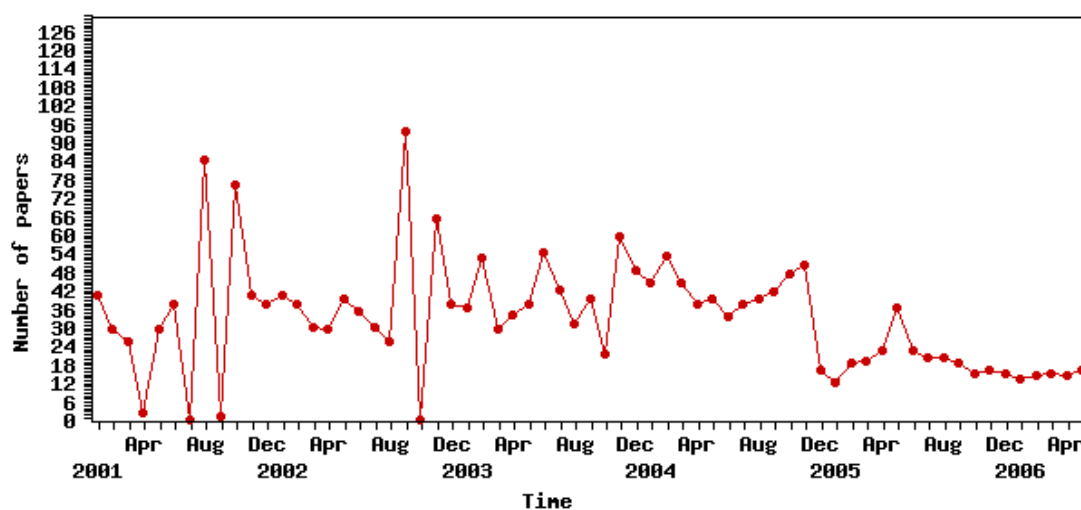

### Numbers at a glance Acta Crystallographica Section D

|                           |       |
|---------------------------|-------|
| Consortia deals           | 2641  |
| Institutional subscribers | 555   |
| Individual subscribers    | 116   |
| Impact Factor (2005)      | 1.401 |
| Ranking (2005)            | 11/24 |

## Acta Crystallographica Section D - competing journals based on citing

Number of times articles published in 2004 (in journals below) cited articles published in *Acta Crystallographica Section D*

| Impact | Citing Journal       | Cited Year |      |      |      |      |      |      |      |      |      |
|--------|----------------------|------------|------|------|------|------|------|------|------|------|------|
|        |                      | All Yrs    | 2004 | 2003 | 2002 | 2001 | 2000 | 1999 | 1998 | 1997 | 1996 |
|        | ALL JOURNALS         | 8772       | 172  | 603  | 919  | 743  | 595  | 1235 | 1839 | 515  | 271  |
| 1.693  | ACTA CRYSTALLOGR D   | 1399       | 58   | 114  | 161  | 132  | 93   | 190  | 192  | 62   | 44   |
| 6.355  | J BIOL CHEM          | 1065       | 18   | 65   | 70   | 80   | 61   | 151  | 266  | 89   | 21   |
| 5.542  | J MOL BIOL           | 953        | 15   | 46   | 72   | 65   | 51   | 128  | 231  | 84   | 20   |
| 4.008  | BIOCHEMISTRY-US      | 640        | 4    | 31   | 46   | 53   | 36   | 95   | 173  | 43   | 14   |
| 5.185  | STRUCTURE            | 450        | 7    | 24   | 41   | 37   | 19   | 75   | 103  | 41   | 17   |
| 10.452 | P NATL ACAD SCI USA  | 331        | 4    | 7    | 26   | 23   | 21   | 55   | 100  | 21   | 8    |
| 4.429  | PROTEINS             | 276        | 0    | 7    | 22   | 19   | 18   | 51   | 72   | 12   | 15   |
|        | ALL OTHERS (213)     | 213        | 2    | 18   | 31   | 26   | 36   | 22   | 33   | 8    | 8    |
| 10.492 | EMBO J               | 160        | 4    | 7    | 5    | 4    | 7    | 28   | 55   | 7    | 2    |
| 4.116  | PROTEIN SCI          | 157        | 4    | 4    | 18   | 16   | 5    | 21   | 44   | 9    | 8    |
| 3.534  | J APPL CRYSTALLOGR   | 147        | 6    | 26   | 22   | 21   | 14   | 21   | 8    | 6    | 4    |
| 16.811 | MOL CELL             | 143        | 0    | 2    | 11   | 9    | 7    | 25   | 48   | 6    | 5    |
| 12     | NAT STRUCT MOL BIOL  | 142        | 3    | 3    | 3    | 12   | 9    | 19   | 46   | 14   | 2    |
| 1.919  | J SYNCHROTRON RADIAT | 117        | 0    | 12   | 22   | 15   | 12   | 20   | 12   | 5    | 5    |
| 2.904  | BIOCHEM BIOPH RES CO | 104        | 2    | 10   | 8    | 12   | 7    | 11   | 22   | 5    | 2    |
| 3.843  | FEBS LETT            | 100        | 5    | 8    | 12   | 6    | 9    | 12   | 22   | 8    | 1    |
| 32.182 | NATURE               | 100        | 1    | 4    | 6    | 5    | 5    | 20   | 29   | 6    | 3    |
| 3.26   | EUR J BIOCHEM        | 88         | 2    | 7    | 9    | 8    | 5    | 7    | 21   | 5    | 3    |
| 5.076  | J MED CHEM           | 76         | 1    | 3    | 10   | 1    | 4    | 12   | 19   | 6    | 1    |
| 4.585  | BIOPHYS J            | 68         | 0    | 6    | 11   | 6    | 4    | 6    | 13   | 3    | 6    |

## Acta Crystallographica Section D - citation report by issue

Special issues are shaded.

| 2003  |      |                                 |                        | 2004  |      |                                 |                        | 2005  |      |                                 |                        |
|-------|------|---------------------------------|------------------------|-------|------|---------------------------------|------------------------|-------|------|---------------------------------|------------------------|
| Issue | Part | No. of articles in ISI database | Average citation count | Issue | Part | No. of articles in ISI database | Average citation count | Issue | Part | No. of articles in ISI database | Average citation count |
| 1     | 0    | 38                              | 4.4                    | 1     | 0    | 47                              | 1.2                    | 1     | 0    | 15                              | 2.1                    |
| 2     | 0    | 36                              | 3.5                    | 2     | 0    | 34                              | 1.3                    | 2     | 0    | 12                              | 1.8                    |
| 3     | 0    | 47                              | 2.9                    | 3     | 0    | 53                              | 1.1                    | 3     | 0    | 18                              | 1.6                    |
| 4     | 0    | 31                              | 2.4                    | 4     | 0    | 44                              | 1.0                    | 4     | 0    | 19                              | 3.8                    |
| 5     | 0    | 31                              | 2.2                    | 5     | 0    | 37                              | 0.9                    | 5     | 0    | 22                              | 1.5                    |
| 6     | 0    | 37                              | 2.5                    | 6     | 0    | 39                              | 1.1                    | 6     | 0    | 36                              | 1.0                    |
| 7     | 0    | 54                              | 3.3                    | 7     | 0    | 33                              | 0.7                    | 7     | 0    | 21                              | 0.7                    |
| 8     | 0    | 40                              | 1.8                    | 8     | 0    | 37                              | 1.1                    | 8     | 0    | 20                              | 0.9                    |
| 9     | 0    | 31                              | 1.6                    | 9     | 0    | 39                              | 0.3                    | 9     | 0    | 20                              | 0.7                    |
| 10    | 0    | 39                              | 1.8                    | 10    | 0    | 41                              | 0.3                    | 10    | 0    | 17                              | 0.2                    |
| 11    | 0    | 20                              | 4.0                    | 11    | 0    | 47                              | 0.1                    | 11    | 0    | 15                              | 0.3                    |
| 12    | 0    | 58                              | 1.6                    | 12    | 1    | 20                              | 2.0                    | 12    | 0    | 16                              | 0.3                    |
|       |      |                                 |                        | 12    | 2    | 29                              | 0.1                    |       |      |                                 |                        |

## Acta Crystallographica Section D - citation report by category

| Category                   | 2003            |                                 |                             |                        | 2004            |                                 |                             |                        | 2005            |                                 |                             |                        |
|----------------------------|-----------------|---------------------------------|-----------------------------|------------------------|-----------------|---------------------------------|-----------------------------|------------------------|-----------------|---------------------------------|-----------------------------|------------------------|
|                            | No. of articles | No. of articles in ISI database | No. of articles not covered | Average citation count | No. of articles | No. of articles in ISI database | No. of articles not covered | Average citation count | No. of articles | No. of articles in ISI database | No. of articles not covered | Average citation count |
| research papers            | 168             | 168                             | 0                           | 4.2                    | 151             | 151                             | 0                           | 1.4                    | 164             | 164                             | 0                           | 1.4                    |
| crystallization papers     | 247             | 247                             | 0                           | 1.4                    | 295             | 287                             | 8                           | 0.5                    | 0               | 0                               | 0                           | 0.0                    |
| short communications       | 31              | 31                              | 0                           | 3.7                    | 36              | 34                              | 2                           | 1.2                    | 60              | 60                              | 0                           | 0.9                    |
| structural genomics papers | 5               | 5                               | 0                           | 4.4                    | 10              | 10                              | 0                           | 1.0                    | 0               | 0                               | 0                           | 0.0                    |

|                                        |   |   |   |     |    |    |   |     |   |   |   |     |
|----------------------------------------|---|---|---|-----|----|----|---|-----|---|---|---|-----|
| letters to the editor                  | 0 | 0 | 0 | 0.0 | 1  | 1  | 0 | 0.0 | 0 | 0 | 0 | 0.0 |
| essays                                 | 0 | 0 | 0 | 0.0 | 0  | 0  | 0 | 0.0 | 1 | 1 | 0 | 0.0 |
| addenda and errata                     | 1 | 1 | 0 | 0.0 | 12 | 12 | 0 | 0.2 | 3 | 3 | 0 | 0.0 |
| book reviews                           | 1 | 0 | 1 | 0.0 | 0  | 0  | 0 | 0.0 | 1 | 0 | 1 | 0.0 |
| books received                         | 2 | 0 | 2 | 0.0 | 0  | 0  | 0 | 0.0 | 0 | 0 | 0 | 0.0 |
| editorial                              | 3 | 2 | 1 | 0.0 | 0  | 0  | 0 | 0.0 | 1 | 1 | 0 | 1.0 |
| international union of crystallography | 2 | 1 | 1 | 0.0 | 1  | 0  | 1 | 0.0 | 1 | 0 | 1 | 0.0 |
| issue preface                          | 1 | 0 | 1 | 0.0 | 1  | 0  | 1 | 0.0 | 1 | 0 | 1 | 0.0 |
| obituaries                             | 0 | 0 | 0 | 0.0 | 2  | 2  | 0 | 0.0 | 1 | 1 | 0 | 0.0 |

## Highly cited papers

| Acta Crystallographica Section D - 2001 |      |            |                      |               |                              |                                                   |                                                                                        |  |  |  |  |  |
|-----------------------------------------|------|------------|----------------------|---------------|------------------------------|---------------------------------------------------|----------------------------------------------------------------------------------------|--|--|--|--|--|
| Issue                                   | Part | First page | Paper category       | ISI citations | Total IUCr citations to date | Authors                                           | Title                                                                                  |  |  |  |  |  |
| 1                                       | 0    | 122        | research papers      | 111           | 13                           | <b>Winn, M.D.</b> , Isupov, M.N., Murshudov, G.N. | Use of TLS parameters to model anisotropic displacements in macromolecular refinement  |  |  |  |  |  |
| 10                                      | 0    | 1367       | research papers      | 103           | 34                           | <b>Navaza, J.</b>                                 | Implementation of molecular replacement in <a href="#">AMoRe</a>                       |  |  |  |  |  |
| 10                                      | 0    | 1373       | research papers      | 53            | 39                           | <b>Read, R.J.</b>                                 | Pushing the boundaries of molecular replacement with maximum likelihood                |  |  |  |  |  |
| 8                                       | 0    | 1201       | short communications | 40            | 5                            | Harris, M., <b>Jones, T.A.</b>                    | Molray - a web interface between O and the POV-Ray ray tracer                          |  |  |  |  |  |
| 12                                      | 0    | 1755       | research papers      | 40            | 17                           | <b>Terwilliger, T.C.</b>                          | Maximum-likelihood density modification using pattern recognition of structural motifs |  |  |  |  |  |

| Acta Crystallographica Section D - 2002 |      |            |                 |               |                              |                                                                                                                                                                                                                                                                     |                                                                       |  |  |  |  |  |
|-----------------------------------------|------|------------|-----------------|---------------|------------------------------|---------------------------------------------------------------------------------------------------------------------------------------------------------------------------------------------------------------------------------------------------------------------|-----------------------------------------------------------------------|--|--|--|--|--|
| Issue                                   | Part | First page | Paper category  | ISI citations | Total IUCr citations to date | Authors                                                                                                                                                                                                                                                             | Title                                                                 |  |  |  |  |  |
| 6                                       | 1    | 899        | research papers | 66            | 16                           | <b>Berman, H.M.</b> , Battistuz, T., Bhat, T.N., Bluhm, W.F., Bourne, P.E., Burkhardt, K., Feng, Z., Gilliland, G.L., Iype, L., Jain, S., Fagan, P., Marvin, J., Padilla, D., Ravichandran, V., Schneider, B., Thanki, N., Weissig, H., Westbrook, J., Zardecki, C. | The Protein Data Bank                                                 |  |  |  |  |  |
| 10                                      | 2    | 1772       | research papers | 53            | 54                           | Schneider, T.R., <b>Sheldrick, G.M.</b>                                                                                                                                                                                                                             | Substructure solution with SHELXD                                     |  |  |  |  |  |
| 3                                       | 0    | 494        | research papers | 35            | 35                           | <b>Dauter, Z.</b> , Dauter, M., Dodson, E.J.                                                                                                                                                                                                                        | Jolly SAD                                                             |  |  |  |  |  |
| 6                                       | 2    | 968        | research papers | 34            | 21                           | Morris, R.J., Perrakis, A., <b>Lamzin, V.S.</b>                                                                                                                                                                                                                     | ARP/wARP's model-building algorithms. I. The main chain               |  |  |  |  |  |
| 11                                      | 0    | 1937       | research papers | 31            | 13                           | <b>Terwilliger, T.C.</b>                                                                                                                                                                                                                                            | Automated structure solution, density modification and model building |  |  |  |  |  |

| Acta Crystallographica Section D - 2003 |      |            |                |               |                              |                                    |                                                |  |  |  |  |  |
|-----------------------------------------|------|------------|----------------|---------------|------------------------------|------------------------------------|------------------------------------------------|--|--|--|--|--|
| Issue                                   | Part | First page | Paper category | ISI citations | Total IUCr citations to date | Authors                            | Title                                          |  |  |  |  |  |
| 7                                       | 0    | 1131       | research       | 37            | 9                            | <b>Potterton, E.</b> , Briggs, P., | A graphical user interface to the CCP4 program |  |  |  |  |  |

|    |   |      |                 |    |    |                                                                                                                   |                                                                                                                                                                  |
|----|---|------|-----------------|----|----|-------------------------------------------------------------------------------------------------------------------|------------------------------------------------------------------------------------------------------------------------------------------------------------------|
|    |   |      | papers          |    |    | Turkenburg, M., Dodson, E.                                                                                        | suite                                                                                                                                                            |
| 1  | 0 | 38   | research papers | 36 | 13 | <b>Terwilliger, T.C.</b>                                                                                          | Automated main-chain model building by template matching and iterative fragment extension                                                                        |
| 11 | 0 | 2023 | research papers | 23 | 2  | <b>Bricogne, G.,</b> Vonrhein, C., Flensburg, C., Schiltz, M., Paciorek, W.                                       | Generation, representation and flow of phase information in structure determination: recent developments in and around SHARP 2.0                                 |
| 6  | 0 | 1028 | research papers | 18 | 6  | Page, R., Grzechnik, S.K., Canaves, J.M., Spraggon, G., Kreusch, A., Kuhn, P., <b>Stevens, R.C.,</b> Lesley, S.A. | Shotgun crystallization strategy for structural genomics: an optimized two-tiered crystallization screen against the <i>Thermotoga maritima</i> proteome         |
| 7  | 0 | 1206 | research papers | 17 | 1  | <b>Oefner, C.,</b> D'Arcy, A., Mac Sweeney, A., Pierau, S., Gardiner, R., Dale, G.E.                              | High-resolution structure of human apo dipeptidyl peptidase IV/CD26 and its complex with 1-[(5-iodopyridin-2-yl)amino]ethylamino-acetyl]-2-cyano-(S)-pyrrolidine |

| Acta Crystallographica Section D - 2004 |      |            |                      |               |                              |                                                                                                         |                                                                                                                                                                |
|-----------------------------------------|------|------------|----------------------|---------------|------------------------------|---------------------------------------------------------------------------------------------------------|----------------------------------------------------------------------------------------------------------------------------------------------------------------|
| Issue                                   | Part | First page | Paper category       | ISI citations | Total IUCr citations to date | Authors                                                                                                 | Title                                                                                                                                                          |
| 3                                       | 0    | 432        | research papers      | 16            | 28                           | Storoni, L.C., <b>McCoy, A.J.,</b> Read, R.J.                                                           | Likelihood-enhanced fast rotation functions                                                                                                                    |
| 8                                       | 0    | 1355       | research papers      | 15            | 3                            | Schuttelkopf, A.W., van Aalten, D.M.F.                                                                  | PRODRG: a tool for high-throughput crystallography of protein-ligand complexes                                                                                 |
| 12                                      | 1    | 2256       | research papers      | 14            | 2                            | Krissinel, E., <b>Henrick, K.</b>                                                                       | Secondary-structure matching (SSM), a new tool for fast protein structure alignment in three dimensions                                                        |
| 12                                      | 1    | 2126       | research papers      | 10            | 16                           | Emsley, P., <b>Cowtan, K.</b>                                                                           | Coot: model-building tools for molecular graphics                                                                                                              |
| 6                                       | 0    | 1008       | research papers      | 7             | 1                            | Anderson, S., <b>Crosson, S., Moffat, K.</b>                                                            | Short hydrogen bonds in photoactive yellow protein                                                                                                             |
| 2                                       | 0    | 241        | research papers      | 6             | 5                            | Hanson, B.L., Langan, P., Katz, A.K., Li, X., Harp, J.M., Glusker, J.P., Schoenborn, B.P., Bunick, G.J. | A preliminary time-of-flight neutron diffraction study of <i>Streptomyces rubiginosus</i> d-xylose isomerase                                                   |
| 1                                       | 0    | 22         | research papers      | 6             | 8                            | Pannu, N.S., <b>Read, R.J.</b>                                                                          | The application of multivariate statistical techniques improves single-wavelength anomalous diffraction phasing                                                |
| 5                                       | 0    | 849        | research papers      | 5             | 2                            | Harding, M.M.                                                                                           | The architecture of metal coordination groups in proteins                                                                                                      |
| 1                                       | 0    | 200        | short communications | 5             | 4                            | Li, X., Langan, P., <b>Bau, R., Tsyba, I., Jenney, F.E., Adams, M.W.W., Schoenborn, B.P.</b>            | W3Y single mutant of rubredoxin from <i>Pyrococcus furiosus</i> : a preliminary time-of-flight neutron study                                                   |
| 2                                       | 0    | 275        | research papers      | 5             | 5                            | Czepas, J., Devedjiev, Y., Krowarsch, D., Derewenda, U., Otlewski, J., Derewenda, Z.S.                  | The impact of Lys-->Arg surface mutations on the crystallization of the globular domain of RhoGDI                                                              |
| 4                                       | 0    | 656        | research papers      | 5             | 4                            | Rudolph, M.G., <b>Wingren, C., Crowley, M.P., Chien, Y.,</b> Wilson, I.A.                               | Combined pseudo-merohedral twinning, non-crystallographic symmetry and pseudo-translation in a monoclinic crystal form of the [gamma][delta] T-cell ligand T10 |

| Acta Crystallographica Section D - 2005 |      |            |                 |               |                              |                                                                                 |                                                                                                                                                 |
|-----------------------------------------|------|------------|-----------------|---------------|------------------------------|---------------------------------------------------------------------------------|-------------------------------------------------------------------------------------------------------------------------------------------------|
| Issue                                   | Part | First page | Paper category  | ISI citations | Total IUCr citations to date | Authors                                                                         | Title                                                                                                                                           |
| 4                                       | 0    | 458        | research papers | 34            | 5                            | <b>McCoy, A.J.,</b> Grosse-Kunstleve, R.W., Storoni, L.C., Read, R.J.           | Likelihood-enhanced fast translation functions                                                                                                  |
| 4                                       | 0    | 449        | research papers | 8             | 4                            | Panjikar, S., <b>Parthasarathy, V., Lamzin, V.S., Weiss, M.S., Tucker, P.A.</b> | Auto-Rickshaw: an automated crystal structure determination platform as an efficient tool for the validation of an X-ray diffraction experiment |
| 4                                       | 0    | 465        | research        | 8             | 2                            | Painter, J., Merritt, E.A.                                                      | A molecular viewer for the analysis of                                                                                                          |

|   |   |     |                      |   |   |                                                                                                                                                                                                                                                             |                                                                                                                                                                               |
|---|---|-----|----------------------|---|---|-------------------------------------------------------------------------------------------------------------------------------------------------------------------------------------------------------------------------------------------------------------|-------------------------------------------------------------------------------------------------------------------------------------------------------------------------------|
|   |   |     | papers               |   |   |                                                                                                                                                                                                                                                             | TLS rigid-body motion in macromolecules                                                                                                                                       |
| 6 | 0 | 651 | short communications | 7 | 4 | Walter, T.S., Diprose, J.M., Mayo, C.J., Siebold, C., Pickford, M.G., Carter, L., Sutton, G.C., Berrow, N.S., Brown, J., Berry, I.M., Stewart-Jones, G.B.E., Grimes, J.M., Stammers, D.K., Esnouf, R.M., Jones, E.Y., Owens, R.J., Stuart, D.I., Harlos, K. | A procedure for setting up high-throughput nanolitre crystallization experiments. Crystallization workflow for initial screening, automated storage, imaging and optimization |
| 5 | 0 | 520 | research papers      | 6 | 3 | Liu, Z.-J., <b>Lin, D., Tempel, W., Praissman, J.L., Rose, J.P.</b> , Wang, B.-C.                                                                                                                                                                           | Parameter-space screening: a powerful tool for high-throughput crystal structure determination                                                                                |
| 2 | 0 | 141 | research papers      | 5 | 0 | Nikulin, A., <b>Stolboushkina, E., Perederina, A., Vassilieva, I., Blaes, U., Moll, I., Kachalova, G., Yokoyama, S., Vassilyev, D., Garber, M., Nikonov, S.</b>                                                                                             | Structure of Pseudomonas aeruginosa Hfq protein                                                                                                                               |
| 6 | 0 | 690 | short communications | 5 | 1 | Koepke, J., Ma, X., Fritzsche, G., Michel, H., Stockigt, J.                                                                                                                                                                                                 | Crystallization and preliminary X-ray analysis of strictosidine synthase and its complex with the substrate tryptamine                                                        |
| 1 | 0 | 75  | research papers      | 5 | 0 | Williams, P.A., Coates, L., Mohammed, F., Gill, R., Erskine, P.T., Coker, A., Wood, S.P., Anthony, C., Cooper, J.B.                                                                                                                                         | The atomic resolution structure of methanol dehydrogenase from Methylobacterium extorquens                                                                                    |
| 3 | 0 | 256 | research papers      | 4 | 4 | Janner, A.                                                                                                                                                                                                                                                  | Strongly correlated structure of axial-symmetric proteins. II. Pentagonal, heptagonal, octagonal, nonagonal and ondecagonal symmetries                                        |
| 3 | 0 | 269 | research papers      | 4 | 4 | Janner, A.                                                                                                                                                                                                                                                  | Strongly correlated structure of axial-symmetric proteins. III. Complexes with DNA/RNA                                                                                        |

## Background information on Section E

### Papers submitted (2000-2005)

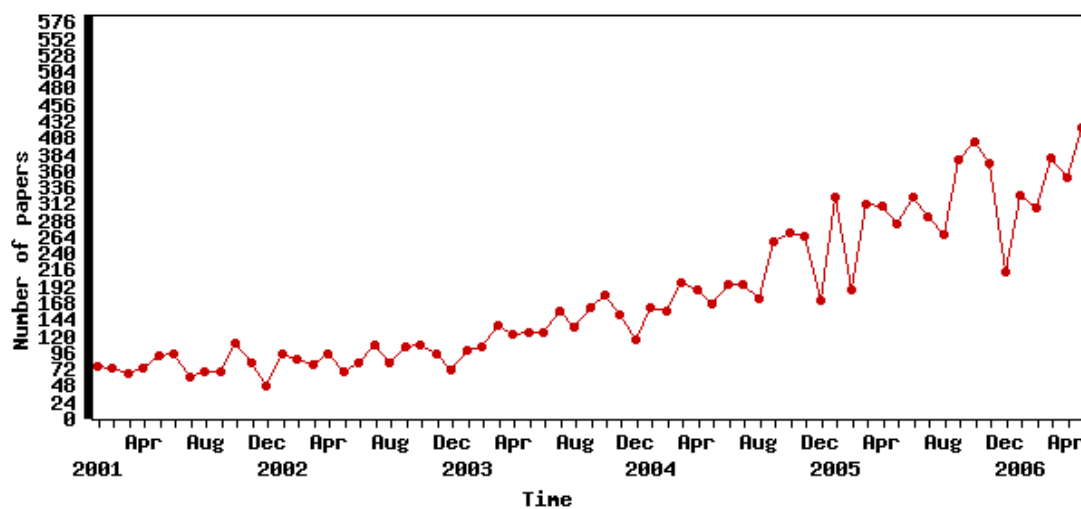

### Papers published (2000-2005)

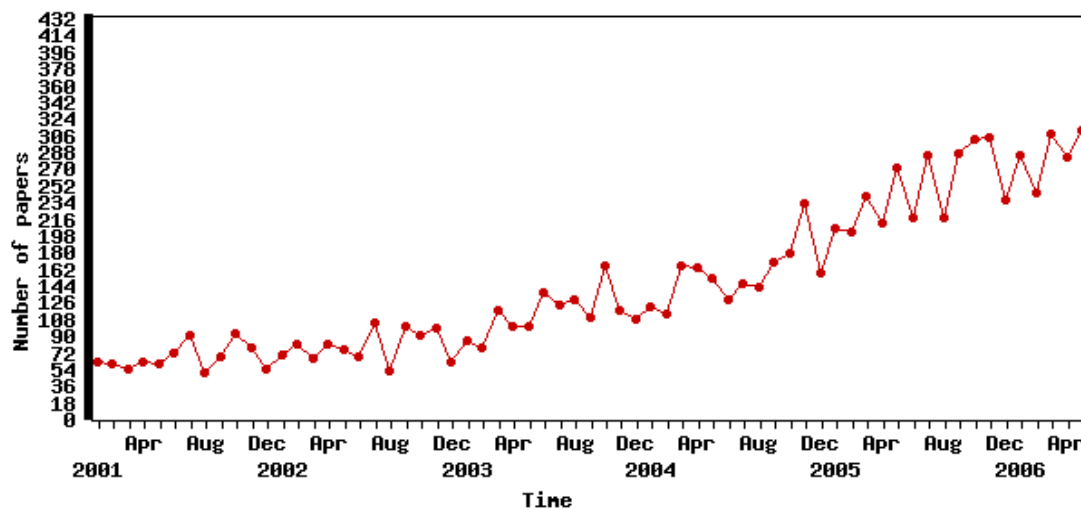

### Numbers at a glance Acta Crystallographica Section E

|                           |       |
|---------------------------|-------|
| Consortia deals           | 2778  |
| Institutional subscribers | 3     |
| Individual subscribers    | 1     |
| Impact factor (2005)      | 0.581 |
| Ranking                   | 20/24 |

## Acta Crystallographica Section E - competing journals based on citing

Number of times articles published in 2004 (in journals below) cited articles published in *Acta Crystallographica Section E*

| Impact | Citing Journal       | Cited Year |      |      |      |      |      |      |      |      |      |
|--------|----------------------|------------|------|------|------|------|------|------|------|------|------|
|        |                      | All Yrs    | 2004 | 2003 | 2002 | 2001 | 2000 | 1999 | 1998 | 1997 | 1996 |
|        | ALL JOURNALS         | 2083       | 685  | 677  | 413  | 299  | 6    | 0    | 0    | 1    | 0    |
| 0.491  | ACTA CRYSTALLOGR E   | 1213       | 595  | 378  | 147  | 91   | 1    | 0    | 0    | 0    | 0    |
| 0.728  | ACTA CRYSTALLOGR C   | 221        | 55   | 101  | 37   | 27   | 0    | 0    | 0    | 1    | 0    |
|        | ALL OTHERS (60)      | 60         | 1    | 13   | 25   | 20   | 1    | 0    | 0    | 0    | 0    |
| 0.33   | Z KRIST-NEW CRYST ST | 28         | 5    | 14   | 4    | 5    | 0    | 0    | 0    | 0    | 0    |
| 5.418  | ACTA CRYSTALLOGR B   | 27         | 0    | 2    | 14   | 11   | 0    | 0    | 0    | 0    | 0    |
| 1.586  | POLYHEDRON           | 25         | 1    | 8    | 12   | 4    | 0    | 0    | 0    | 0    | 0    |
| 3.454  | INORG CHEM           | 24         | 0    | 6    | 5    | 11   | 2    | 0    | 0    | 0    | 0    |
| 2.596  | CRYSTENGCOMM         | 21         | 2    | 6    | 10   | 3    | 0    | 0    | 0    | 0    | 0    |
| 1.682  | INORG CHEM COMMUN    | 21         | 2    | 2    | 12   | 5    | 0    | 0    | 0    | 0    | 0    |
| 1.554  | INORG CHIM ACTA      | 18         | 0    | 3    | 5    | 10   | 0    | 0    | 0    | 0    | 0    |
| 2.926  | DALTON T             | 16         | 0    | 10   | 3    | 3    | 0    | 0    | 0    | 0    | 0    |
| 2.336  | EUR J INORG CHEM     | 14         | 0    | 6    | 6    | 1    | 1    | 0    | 0    | 0    | 0    |
| 1.086  | Z ANORG ALLG CHEM    | 14         | 1    | 8    | 3    | 2    | 0    | 0    | 0    | 0    | 0    |
| 1.2    | J MOL STRUCT         | 13         | 0    | 2    | 7    | 4    | 0    | 0    | 0    | 0    | 0    |
| 1.123  | J RES NATL INST STAN | 13         | 0    | 1    | 10   | 2    | 0    | 0    | 0    | 0    | 0    |
| 3.997  | CHEM COMMUN          | 12         | 3    | 5    | 2    | 2    | 0    | 0    | 0    | 0    | 0    |
| 0.512  | J CHEM CRYSTALLOGR   | 12         | 0    | 4    | 1    | 7    | 0    | 0    | 0    | 0    | 0    |
| 0.847  | J COORD CHEM         | 12         | 1    | 5    | 3    | 2    | 1    | 0    | 0    | 0    | 0    |
| 2.856  | CRYST GROWTH DES     | 11         | 1    | 2    | 3    | 5    | 0    | 0    | 0    | 0    | 0    |
| 2.426  | EUR J ORG CHEM       | 10         | 1    | 4    | 2    | 3    | 0    | 0    | 0    | 0    | 0    |

## Acta Crystallographica Section E - citation report by issue

| 2003  |      |                                 |                        | 2004  |      |                                 |                        | 2005  |      |                                 |                        |
|-------|------|---------------------------------|------------------------|-------|------|---------------------------------|------------------------|-------|------|---------------------------------|------------------------|
| Issue | Part | No. of articles in ISI database | Average citation count | Issue | Part | No. of articles in ISI database | Average citation count | Issue | Part | No. of articles in ISI database | Average citation count |
| 1     | 0    | 59                              | 1.6                    | 1     | 0    | 41                              | 0.5                    | 1     | 0    | 157                             | 0.9                    |
| 2     | 0    | 83                              | 1.4                    | 2     | 0    | 38                              | 0.6                    | 2     | 0    | 205                             | 1.0                    |
| 3     | 0    | 75                              | 1.3                    | 3     | 0    | 37                              | 0.5                    | 3     | 0    | 200                             | 0.5                    |
| 4     | 0    | 116                             | 0.9                    | 4     | 0    | 96                              | 0.7                    | 4     | 0    | 239                             | 0.7                    |
| 5     | 0    | 98                              | 0.8                    | 5     | 0    | 108                             | 0.9                    | 5     | 0    | 211                             | 0.6                    |
| 6     | 0    | 99                              | 1.6                    | 6     | 0    | 109                             | 0.7                    | 6     | 0    | 270                             | 0.4                    |
| 7     | 0    | 136                             | 1.6                    | 7     | 0    | 82                              | 0.6                    | 7     | 0    | 216                             | 0.5                    |
| 8     | 0    | 122                             | 1.1                    | 8     | 0    | 114                             | 0.6                    | 8     | 0    | 284                             | 0.6                    |
| 9     | 0    | 126                             | 0.9                    | 9     | 0    | 141                             | 0.6                    | 9     | 0    | 187                             | 0.6                    |
| 10    | 0    | 110                             | 0.8                    | 10    | 0    | 168                             | 0.4                    | 10    | 0    | 285                             | 0.4                    |
| 11    | 0    | 164                             | 0.7                    | 11    | 0    | 178                             | 0.4                    | 11    | 0    | 300                             | 0.3                    |
| 12    | 0    | 116                             | 0.7                    | 12    | 0    | 143                             | 0.9                    | 12    | 0    | 303                             | 0.3                    |

## Acta Crystallographica Section E - citation report by category

| Category                               | 2003            |                                 |                             |                        | 2004            |                                 |                             |                        | 2005            |                                 |                             |                        |
|----------------------------------------|-----------------|---------------------------------|-----------------------------|------------------------|-----------------|---------------------------------|-----------------------------|------------------------|-----------------|---------------------------------|-----------------------------|------------------------|
|                                        | No. of articles | No. of articles in ISI database | No. of articles not covered | Average citation count | No. of articles | No. of articles in ISI database | No. of articles not covered | Average citation count | No. of articles | No. of articles in ISI database | No. of articles not covered | Average citation count |
| inorganic compounds                    | 59              | 59                              | 0                           | 0.5                    | 57              | 43                              | 14                          | 0.4                    | 104             | 103                             | 1                           | 0.4                    |
| organic compounds                      | 792             | 792                             | 0                           | 1.1                    | 1002            | 631                             | 371                         | 0.5                    | 1743            | 1724                            | 19                          | 0.6                    |
| metal-organic compounds                | 446             | 446                             | 0                           | 1.1                    | 743             | 578                             | 165                         | 0.8                    | 1031            | 1021                            | 10                          | 0.5                    |
| addenda and errata                     | 5               | 5                               | 0                           | 0.0                    | 5               | 3                               | 2                           | 0.0                    | 8               | 8                               | 0                           | 0.0                    |
| editorial                              | 2               | 2                               | 0                           | 0.0                    | 1               | 0                               | 1                           | 0.0                    | 1               | 1                               | 0                           | 0.0                    |
| international union of crystallography | 1               | 0                               | 1                           | 0.0                    | 1               | 0                               | 1                           | 0.0                    | 0               | 0                               | 0                           | 0.0                    |

## Highly cited papers

| Acta Crystallographica Section E - 2001 |      |            |                         |               |                              |                                                                                                                                 |                                                                                                                             |
|-----------------------------------------|------|------------|-------------------------|---------------|------------------------------|---------------------------------------------------------------------------------------------------------------------------------|-----------------------------------------------------------------------------------------------------------------------------|
| Issue                                   | Part | First page | Paper category          | ISI citations | Total IUCr citations to date | Authors                                                                                                                         | Title                                                                                                                       |
| 10                                      | 0    | o947       | organic compounds       | 21            | 19                           | Davies, J.E., <b>Bond, A.D.</b>                                                                                                 | Quinoline                                                                                                                   |
| 9                                       | 0    | o901       | organic compounds       | 11            | 12                           | Jeyabharathi, A., Ponnuswamy, M.N., Amal Raj, A., Raghunathan, R., Razak, I.A., Usman, A., Chantrapromma, S., <b>Fun, H.-K.</b> | 3-Benzylidene-1'-methyl-4'-phenylcyclohexanespiro-3'-pyrrolidine-2'-spiro-3- <i>indoline</i> -2,2-dione                     |
| 12                                      | 0    | m591       | metal-organic compounds | 10            | 11                           | Raj, S.B., <b>Muthiah, P.T.</b> , Bocelli, G., Righi, L.                                                                        | Tetraaqua(8-hydroxyquinoline-5-sulfonato-N,O)nickel(II) monohydrate                                                         |
| 3                                       | 0    | m111       | metal-organic compounds | 9             | 3                            | Salami, T.O., Zavalij, P.Y., <b>Oliver, S.R.J.</b>                                                                              | BING-1: a tin-oxalate-sodium-fluoride framework, <a href="#">Na4Sn4(C2O4)3F6</a>                                            |
| 12                                      | 0    | o1179      | organic compounds       | 8             | 9                            | <b>Muthiah, P.T.</b> , Umadevi, B., Stanley, N., Shui, X., Eggleston, D.S.                                                      | Hydrogen bonding patterns in trimethoprim sulfate trihydrate [trimethoprim = 2,4-diamino-5-(3,4,5-methoxybenzyl)pyrimidine] |

| Acta Crystallographica Section E - 2002 |      |            |                         |               |                              |                                                              |                                                                                                                                                      |
|-----------------------------------------|------|------------|-------------------------|---------------|------------------------------|--------------------------------------------------------------|------------------------------------------------------------------------------------------------------------------------------------------------------|
| Issue                                   | Part | First page | Paper category          | ISI citations | Total IUCr citations to date | Authors                                                      | Title                                                                                                                                                |
| 10                                      | 0    | m513       | metal-organic compounds | 9             | 9                            | Basker Raj, S., <b>Muthiah, P.T.</b> , Bocelli, G., Olla, R. | Metal-binding modes in sulfoxines: supramolecular network in (8-hydroxyquinoline-5-sulfonato-N1,O8)sodium(I)                                         |
| 12                                      | 0    | o1365      | organic compounds       | 7             | 3                            | <b>Wang, J.-L.</b> , Zhang, S.-M., Miao, F.-M.               | 4-[(2-Hydroxyphenylamino)phenylmethylene]-5-methyl-2-phenyl-2H-pyrazol-3(4H)-one                                                                     |
| 12                                      | 0    | o1333      | organic compounds       | 7             | 10                           | Shan, S., <b>Xu, D.-J.</b> , Wu, J.-Y., Chiang, M.Y.         | Acetophenone (2,4-dinitrophenyl)hydrazone                                                                                                            |
| 5                                       | 0    | m217       | metal-organic compounds | 6             | 7                            | Zhu, M., Lu, L., <b>Yang, P.</b> , Jin, X.                   | Bis(1,1-dimethylbiguanido)copper(II) octahydrate                                                                                                     |
| 10                                      | 0    | o1142      | organic compounds       | 6             | 7                            | Stibrany, R.T., Schugar, H.J., <b>Potenza, J.A.</b>          | [ <b>bold kappa</b> ]2N13,N13'-Hydro-rac-2,2'-bis[2-(1-propylbenzimidazol-2yl)]biphenyl trifluoromethanesulfonate, the salt of a novel proton sponge |

| Acta Crystallographica Section E - 2003 |      |            |                         |               |                              |                                                                     |                                                                                                                           |
|-----------------------------------------|------|------------|-------------------------|---------------|------------------------------|---------------------------------------------------------------------|---------------------------------------------------------------------------------------------------------------------------|
| Issue                                   | Part | First page | Paper category          | ISI citations | Total IUCr citations to date | Authors                                                             | Title                                                                                                                     |
| 3                                       | 0    | o378       | organic compounds       | 23            | 22                           | Vembu, N., <b>Nallu, M.</b> , Garrison, J., Youngs, W.J.            | 2,4-Dinitrophenyl 4-toluenesulfonate: molecular aggregation through weak C-H...O interactions                             |
| 11                                      | 0    | m1025      | metal-organic compounds | 20            | 18                           | You, Z.-L., Lin, Y.-S., Liu, W.-S., Tan, M.-Y., <b>Zhu, H.-L.</b>   | Bis[2-(cyclopropyliminomethyl)phenolato]zinc(II)                                                                          |
| 6                                       | 0    | o830       | organic compounds       | 20            | 19                           | Vembu, N., <b>Nallu, M.</b> , Garrison, J., Hindi, K., Youngs, W.J. | 4-Methoxyphenyl 4-toluenesulfonate: supramolecular aggregation through C-H...O and C-H...[ <b>bold pi</b> ] interactions  |
| 4                                       | 0    | o503       | organic compounds       | 20            | 20                           | Vembu, N., <b>Nallu, M.</b> , Garrison, J., Youngs, W.J.            | 2-Chlorophenyl 4-toluenesulfonate: molecular aggregation through weak C-H...O interactions                                |
| 6                                       | 0    | o776       | organic compounds       | 19            | 18                           | Vembu, N., <b>Nallu, M.</b> , Garrison, J., Youngs, W.J.            | Redetermination of 8-tosyloxyquinoline at 100 K: supramolecular aggregation through weak C-H...O and C-H...N interactions |

| Acta Crystallographica Section E - 2004 |      |            |                         |               |                              |                                                               |                                                                                                                                           |
|-----------------------------------------|------|------------|-------------------------|---------------|------------------------------|---------------------------------------------------------------|-------------------------------------------------------------------------------------------------------------------------------------------|
| Issue                                   | Part | First page | Paper category          | ISI citations | Total IUCr citations to date | Authors                                                       | Title                                                                                                                                     |
| 12                                      | 0    | m1970      | metal-organic compounds | 14            | 11                           | Fan, S.-R., Xiao, H.-P., Zhang, L.-P., Cai, G.-Q., Zhu, L.-G. | Poly[[aqua(1,10-phenanthroline-[kappa]2N,N')copper(II)]-[mu]-4-sulfonatobenzoato-[kappa]2O4:O1]                                           |
| 12                                      | 0    | m1833      | metal-organic compounds | 13            | 11                           | Fan, S.-R., Xiao, H.-P., Zhang, L.-P., Zhu, L.-G.             | Bis([mu]-4-sulfobenzoato-[kappa]2O:O')bis[aqua(2,2'-bipyridine-[kappa]2N,N')copper(II)]                                                   |
| 5                                       | 0    | m560       | metal-organic compounds | 10            | 8                            | You, Z.-L., Zhu, H.-L., Liu, W.-S.                            | A butterfly-shaped Schiff base complex: bis[2-(cyclopropyliminomethyl)naphthalato]dithiocyanatozinc(II)                                   |
| 9                                       | 0    | m1267      | metal-organic compounds | 10            |                              | Gao, S., Liu, J.-W., Huo, L.-H., Zhao, H., Zhao, J.-G.        | catena-Poly[[aquaabis(1H-imidazole-[kappa]N3)copper(II)]-[mu]-benzene-1,4-dioxyacetato-[kappa]2O:O']                                      |
| 6                                       | 0    | m884       | metal-organic compounds | 9             | 12                           | You, Z.-L., Chen, B., Zhu, H.-L., Liu, W.-S.                  | Aqua[2-(pyridin-2-ylmethyliminomethyl)phenolato-[kappa]3N,N',O]copper(II) nitrate monohydrate                                             |
| 9                                       | 0    | m1308      | metal-organic compounds | 8             |                              | Gao, S., Liu, J.-W., Huo, L.-H., Zhao, H., Zhao, J.-G.        | A one-dimensional chain CdII polymer: catena-poly[[tris(1H-imidazole-[kappa]N3)cadmium(II)]-[mu]-benzene-1,4-dioxyacetato-[kappa]3O,O':O] |
| 9                                       | 0    | m1242      | metal-organic compounds | 8             |                              | Gao, S., Liu, J.-W., Huo, L.-H., Zhao, H., Zhao, J.-G.        | catena-Poly[[tetraaquaacobalt(II)]-[mu]-benzene-1,4-dioxyacetato-[kappa]2O:O']                                                            |
| 9                                       | 0    | m1231      | metal-organic compounds | 8             |                              | Gao, S., Liu, J.-W., Huo, L.-H., Zhao, H., Zhao, J.-G.        | catena-Poly[[[aqua(1,10-phenanthroline-[kappa]2N,N')copper(II)]-[mu]-benzene-1,4-dioxyacetato-[kappa]3O,O':O] monohydrate]                |
| 8                                       | 0    | o1401      | organic compounds       | 8             | 9                            | Wang, J., Shi, D., Wang, X.                                   | Ethyl 9-amino-7-(4-methoxyphenyl)-7H-pyrano[3,2-c]coumarin-8-carboxylate                                                                  |
| 5                                       | 0    | m606       | metal-organic compounds | 8             | 8                            | Huo, L.-H., Gao, S., Liu, J.-W., Zhao, H., Ng, S.W.           | Ethanol(ethoxy)[3-methoxyisalicylaldehyde (4-methoxybenzoyl)hydrazonato-[kappa]3O,N,O']oxovanadium(V)                                     |

| Acta Crystallographica Section E - 2005 |      |            |                         |               |                              |                                                               |                                                                                                                                           |
|-----------------------------------------|------|------------|-------------------------|---------------|------------------------------|---------------------------------------------------------------|-------------------------------------------------------------------------------------------------------------------------------------------|
| Issue                                   | Part | First page | Paper category          | ISI citations | Total IUCr citations to date | Authors                                                       | Title                                                                                                                                     |
| 12                                      | 0    | m1970      | metal-organic compounds | 14            | 11                           | Fan, S.-R., Xiao, H.-P., Zhang, L.-P., Cai, G.-Q., Zhu, L.-G. | Poly[[aqua(1,10-phenanthroline-[kappa]2N,N')copper(II)]-[mu]-4-sulfonatobenzoato-[kappa]2O4:O1]                                           |
| 12                                      | 0    | m1833      | metal-organic compounds | 13            | 11                           | Fan, S.-R., Xiao, H.-P., Zhang, L.-P., Zhu, L.-G.             | Bis([mu]-4-sulfobenzoato-[kappa]2O:O')bis[aqua(2,2'-bipyridine-[kappa]2N,N')copper(II)]                                                   |
| 5                                       | 0    | m560       | metal-organic compounds | 10            | 8                            | You, Z.-L., Zhu, H.-L., Liu, W.-S.                            | A butterfly-shaped Schiff base complex: bis[2-(cyclopropyliminomethyl)naphthalato]dithiocyanatozinc(II)                                   |
| 9                                       | 0    | m1267      | metal-organic compounds | 10            |                              | Gao, S., Liu, J.-W., Huo, L.-H., Zhao, H., Zhao, J.-G.        | catena-Poly[[aquaabis(1H-imidazole-[kappa]N3)copper(II)]-[mu]-benzene-1,4-dioxyacetato-[kappa]2O:O']                                      |
| 6                                       | 0    | m884       | metal-organic compounds | 9             | 12                           | You, Z.-L., Chen, B., Zhu, H.-L., Liu, W.-S.                  | Aqua[2-(pyridin-2-ylmethyliminomethyl)phenolato-[kappa]3N,N',O]copper(II) nitrate monohydrate                                             |
| 9                                       | 0    | m1308      | metal-organic compounds | 8             |                              | Gao, S., Liu, J.-W., Huo, L.-H., Zhao, H., Zhao, J.-G.        | A one-dimensional chain CdII polymer: catena-poly[[tris(1H-imidazole-[kappa]N3)cadmium(II)]-[mu]-benzene-1,4-dioxyacetato-[kappa]3O,O':O] |
| 9                                       | 0    | m1242      | metal-organic compounds | 8             |                              | Gao, S., Liu, J.-W., Huo, L.-H., Zhao, H., Zhao, J.-G.        | catena-Poly[[tetraaquaacobalt(II)]-[mu]-benzene-1,4-dioxyacetato-[kappa]2O:O']                                                            |
| 9                                       | 0    | m1231      | metal-organic           | 8             |                              | Gao, S., Liu, J.-W., Huo, L.-H., Zhao, H., Zhao, J.-G.        | catena-Poly[[[aqua(1,10-phenanthroline-[kappa]2N,N')copper(II)]-[mu]-benzene-1,4-                                                         |

|   |   |       |                         |   |   |                                                            |                                                                                                      |
|---|---|-------|-------------------------|---|---|------------------------------------------------------------|------------------------------------------------------------------------------------------------------|
|   |   |       | compounds               |   |   | <b>G.</b>                                                  | dioxyacetato-[kappa]3O,O'] <i>monohydrate</i>                                                        |
| 8 | 0 | o1401 | organic compounds       | 8 | 9 | Wang, J., Shi, D., <b>Wang, X.</b>                         | Ethyl 9-amino-7-(4-methoxyphenyl)-7H-pyrano[3,2-c]coumarin-8-carboxylate                             |
| 5 | 0 | m606  | metal-organic compounds | 8 | 8 | Huo, L.-H., Gao, S., <b>Liu, J.-W., Zhao, H., Ng, S.W.</b> | Ethanol(ethoxy)[3-methoxysalicylaldehyde (4-methoxybenzoyl)hydrazonato-[kappa]3O,N,O']oxovanadium(V) |

## Background information on Section F

### Papers submitted (2000-2005)

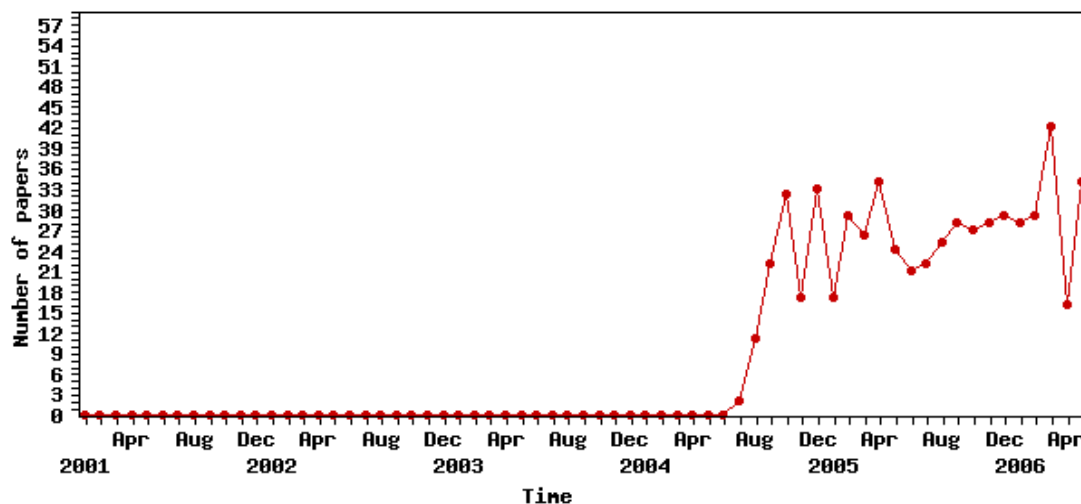

### Papers published (2000-2005)

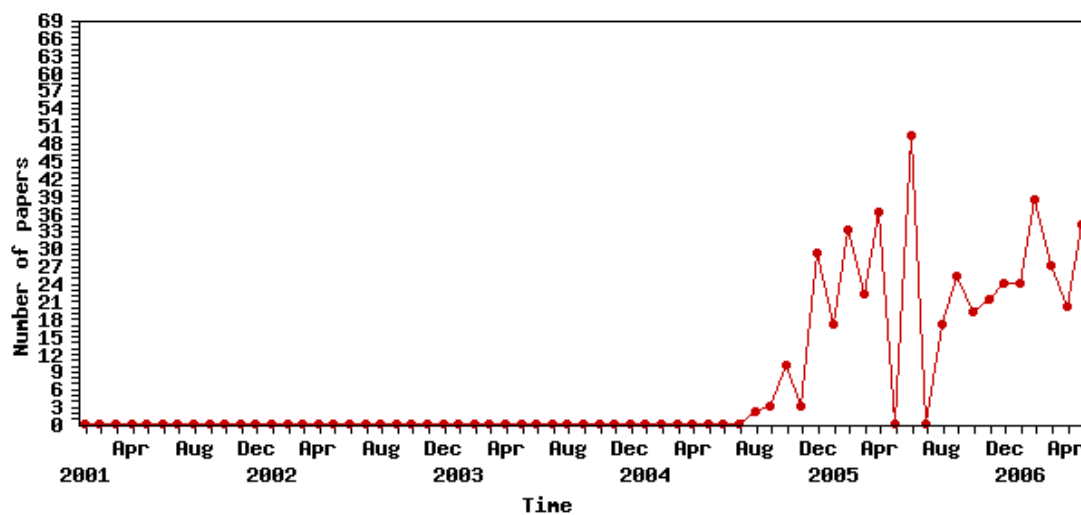

### Numbers at a glance Acta Crystallographica Section E

|                           |      |
|---------------------------|------|
| Consortia deals           | 2780 |
| Institutional subscribers | 0    |
| Individual subscribers    | 0    |
| Impact factor (2005)      | -    |
| Ranking                   | -    |

## Acta Crystallographica Section F - citation report by issue

| 2003  |      |                                  |                        | 2004  |      |                                  |                        | 2005  |      |                                  |                        |
|-------|------|----------------------------------|------------------------|-------|------|----------------------------------|------------------------|-------|------|----------------------------------|------------------------|
| Issue | Part | No . of articles in ISI database | Average citation count | Issue | Part | No . of articles in ISI database | Average citation count | Issue | Part | No . of articles in ISI database | Average citation count |
|       |      |                                  |                        |       |      |                                  |                        | 1     | 0    | 46                               | 0.7                    |
|       |      |                                  |                        |       |      |                                  |                        | 2     | 0    | 28                               | 0.6                    |
|       |      |                                  |                        |       |      |                                  |                        | 3     | 0    | 24                               | 0.5                    |
|       |      |                                  |                        |       |      |                                  |                        | 4     | 0    | 32                               | 0.5                    |
|       |      |                                  |                        |       |      |                                  |                        | 5     | 0    | 24                               | 0.4                    |
|       |      |                                  |                        |       |      |                                  |                        | 6     | 0    | 22                               | 0.4                    |
|       |      |                                  |                        |       |      |                                  |                        | 7     | 0    | 27                               | 0.2                    |
|       |      |                                  |                        |       |      |                                  |                        | 8     | 0    | 25                               | 0.3                    |
|       |      |                                  |                        |       |      |                                  |                        | 9     | 0    | 17                               | 0.2                    |
|       |      |                                  |                        |       |      |                                  |                        | 10    | 0    | 25                               | 0.2                    |
|       |      |                                  |                        |       |      |                                  |                        | 11    | 0    | 19                               | 0.1                    |
|       |      |                                  |                        |       |      |                                  |                        | 12    | 0    | 21                               | 0.1                    |

## Acta Crystallographica Section F - citation report by category

| Category                               | 2003            |                                  |                             |                        | 2004            |                                  |                             |                        | 2005            |                                  |                             |                        |
|----------------------------------------|-----------------|----------------------------------|-----------------------------|------------------------|-----------------|----------------------------------|-----------------------------|------------------------|-----------------|----------------------------------|-----------------------------|------------------------|
|                                        | No. of articles | No . of articles in ISI database | No. of articles not covered | Average citation count | No. of articles | No . of articles in ISI database | No. of articles not covered | Average citation count | No. of articles | No . of articles in ISI database | No. of articles not covered | Average citation count |
| crystallization communications         | 0               | 0                                | 0                           | 0.0                    | 0               | 0                                | 0                           | 0.0                    | 276             | 276                              | 0                           | 0.4                    |
| protein structure communications       | 0               | 0                                | 0                           | 0.0                    | 0               | 0                                | 0                           | 0.0                    | 20              | 20                               | 0                           | 0.8                    |
| structural genomics communications     | 0               | 0                                | 0                           | 0.0                    | 0               | 0                                | 0                           | 0.0                    | 13              | 13                               | 0                           | 0.0                    |
| editorial                              | 0               | 0                                | 0                           | 0.0                    | 0               | 0                                | 0                           | 0.0                    | 1               | 1                                | 0                           | 0.0                    |
| international union of crystallography | 0               | 0                                | 0                           | 0.0                    | 0               | 0                                | 0                           | 0.0                    | 1               | 0                                | 1                           | 0.0                    |

## Highly cited papers

| Acta Crystallographica Section F - 2005 |      |            |                                  |               |                              |                                                                                                                  |                                                                                                                                  |
|-----------------------------------------|------|------------|----------------------------------|---------------|------------------------------|------------------------------------------------------------------------------------------------------------------|----------------------------------------------------------------------------------------------------------------------------------|
| Issue                                   | Part | First page | Paper category                   | ISI citations | Total IUCr citations to date | Authors                                                                                                          | Title                                                                                                                            |
| 1                                       | 0    | 14         | protein structure communications | 4             | 0                            | Holton, S.J., Dairou, J., Sandy, J., Rodrigues-Lima, F., Dupret, J.-M., Noble, M.E.M., <b>Sim, E.</b>            | Structure of Mesorhizobium loti arylamine N-acetyltransferase 1                                                                  |
| 1                                       | 0    | 3          | protein structure communications | 3             | 0                            | <b>Sekar, K.</b> , Rajakannan, V., Gayathri, D., Velmurugan, D., Poi, M.-J., Dauter, M., Dauter, Z., Tsai, M.-D. | Atomic resolution (0.97 Å) structure of the triple mutant (K53,56,121M) of bovine pancreatic phospholipase A2                    |
| 2                                       | 0    | 212        | crystallization communications   | 3             | 0                            | <b>Abergel, C.</b> , Chenivresse, S., Byrne, D., Suhre, K., Arondel, V., Claverie, J.-M.                         | Mimivirus TyrRS: preliminary structural and functional characterization of the first amino-acyl tRNA synthetase found in a virus |
| 2                                       | 0    | 221        | crystallization communications   | 3             | 0                            | Lagartera, L., Gonzalez, A., Stelter, M., Garcia, P., Kahn, R., Menendez, M., <b>Hermoso, J.A.</b>               | Crystallization and preliminary X-ray diffraction studies of the pneumococcal teichoic acid phosphorylcholine esterase Pce       |

## Background information on Journal of Applied Crystallography

### Papers submitted (2000-2005)

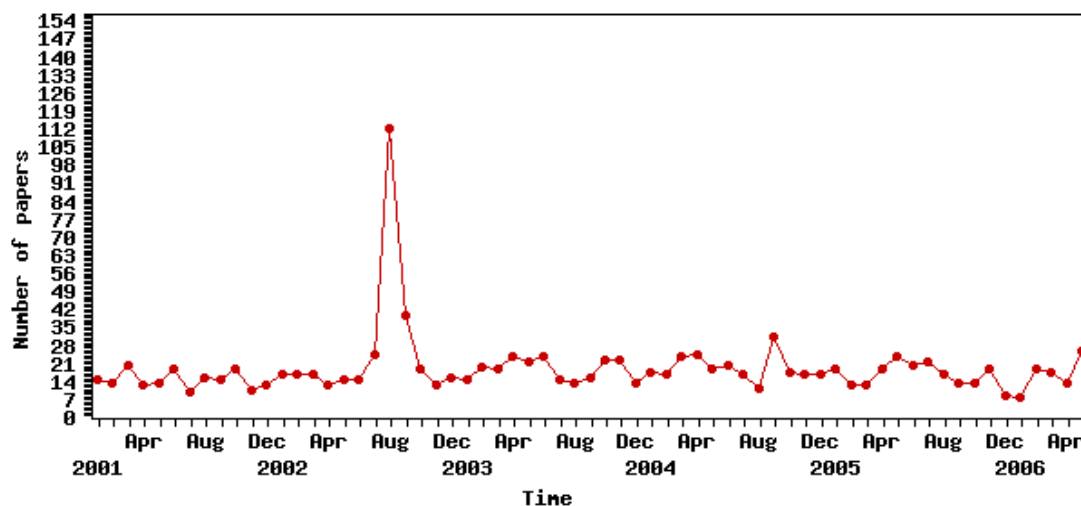

### Papers published (2000-2005)

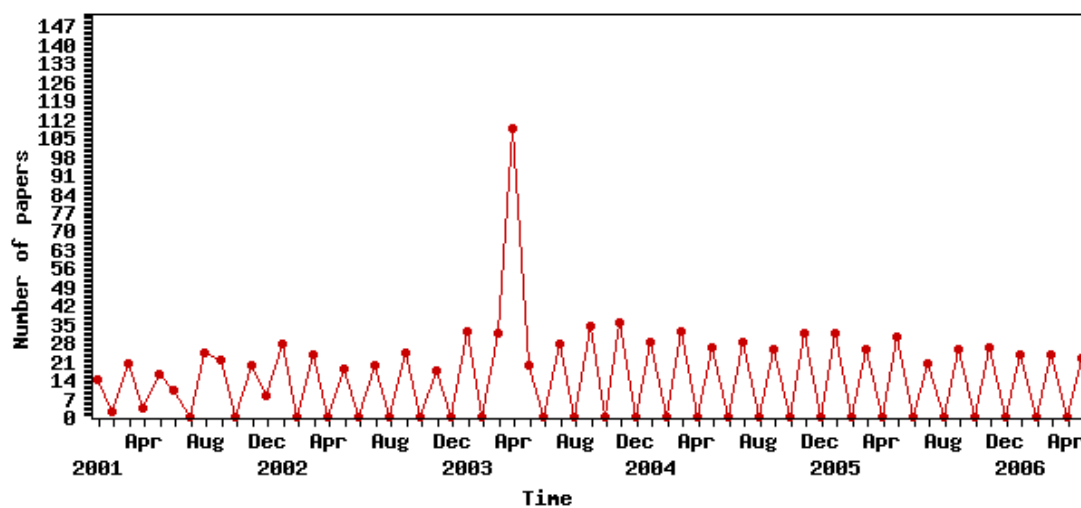

### Numbers at a glance Journal of Applied Crystallography

|                           |       |
|---------------------------|-------|
| Consortia deals           | 2649  |
| Institutional subscribers | 522   |
| Individual subscribers    | 86    |
| Impact factor (2005)      | 5.248 |
| Ranking                   | 1/24  |

## Journal of Applied Crystallography - competing journals based on citing

Number of times articles published in 2004 (in journals below) cited articles published in *Journal of Applied Crystallography*

| Impact | Citing Journal     | Cited Year |      |      |      |      |      |      |      |      |      |
|--------|--------------------|------------|------|------|------|------|------|------|------|------|------|
|        |                    | All Yrs    | 2004 | 2003 | 2002 | 2001 | 2000 | 1999 | 1998 | 1997 | 1996 |
|        | ALL JOURNALS       | 12629      | 93   | 980  | 264  | 339  | 466  | 1560 | 189  | 1668 | 186  |
| 0.491  | ACTA CRYSTALLOGR E | 1541       | 14   | 311  | 2    | 0    | 8    | 377  | 0    | 496  | 1    |
| 0.728  | ACTA CRYSTALLOGR C | 512        | 5    | 130  | 2    | 0    | 19   | 117  | 0    | 160  | 6    |
| 3.534  | J APPL CRYSTALLOGR | 493        | 33   | 38   | 25   | 32   | 39   | 34   | 17   | 26   | 12   |
| 6.355  | J BIOL CHEM        | 448        | 1    | 8    | 2    | 6    | 11   | 3    | 1    | 39   | 0    |
| 5.542  | J MOL BIOL         | 421        | 1    | 11   | 3    | 7    | 10   | 4    | 2    | 35   | 0    |
| 1.693  | ACTA CRYSTALLOGR D | 417        | 4    | 11   | 13   | 18   | 8    | 13   | 5    | 68   | 5    |
| 4.008  | BIOCHEMISTRY-US    | 267        | 1    | 8    | 0    | 2    | 2    | 11   | 1    | 20   | 2    |
| 3.454  | INORG CHEM         | 259        | 1    | 10   | 4    | 2    | 5    | 64   | 5    | 35   | 2    |
|        | ALL OTHERS (247)   | 247        | 0    | 7    | 4    | 7    | 16   | 8    | 4    | 18   | 5    |
| 1.815  | J SOLID STATE CHEM | 217        | 1    | 8    | 1    | 14   | 4    | 27   | 5    | 5    | 10   |
| 1.562  | J ALLOY COMPD      | 183        | 0    | 1    | 3    | 9    | 7    | 18   | 6    | 5    | 6    |
| 5.185  | STRUCTURE          | 165        | 2    | 7    | 6    | 3    | 3    | 7    | 0    | 7    | 1    |
| 1.554  | INORG CHIM ACTA    | 160        | 0    | 8    | 0    | 0    | 0    | 35   | 1    | 47   | 2    |
| 2.926  | DALTON T           | 159        | 0    | 7    | 2    | 2    | 2    | 56   | 2    | 29   | 2    |
| 1.39   | Z KRISTALLOGR      | 158        | 6    | 13   | 3    | 9    | 4    | 25   | 3    | 10   | 3    |
| 4.429  | PROTEINS           | 144        | 0    | 0    | 24   | 1    | 3    | 10   | 0    | 4    | 3    |
| 3.196  | ORGANOMETALLICS    | 139        | 0    | 12   | 0    | 0    | 3    | 29   | 6    | 30   | 3    |
| 0.498  | MATER SCI FORUM    | 137        | 0    | 3    | 4    | 12   | 9    | 17   | 6    | 6    | 6    |
| 2.336  | EUR J INORG CHEM   | 132        | 0    | 6    | 1    | 1    | 1    | 37   | 1    | 30   | 1    |
| 6.903  | J AM CHEM SOC      | 132        | 1    | 14   | 3    | 0    | 5    | 14   | 4    | 16   | 3    |

## Journal of Applied Crystallography - citation report by issue

Special issues are shaded.

| 2003  |      |                                 |                        | 2004  |      |                                 |                        | 2005  |      |                                 |                        |
|-------|------|---------------------------------|------------------------|-------|------|---------------------------------|------------------------|-------|------|---------------------------------|------------------------|
| Issue | Part | No. of articles in ISI database | Average citation count | Issue | Part | No. of articles in ISI database | Average citation count | Issue | Part | No. of articles in ISI database | Average citation count |
| 1     | 0    | 28                              | 40.4                   | 1     | 0    | 27                              | 1.4                    | 1     | 0    | 28                              | 2.1                    |
| 2     | 0    | 28                              | 5.8                    | 2     | 0    | 29                              | 2.3                    | 2     | 0    | 25                              | 1.3                    |
| 3     | 1    | 96                              | 1.8                    | 3     | 0    | 25                              | 1.0                    | 3     | 0    | 26                              | 0.7                    |
| 3     | 2    | 14                              | 4.9                    |       |      |                                 |                        |       |      |                                 |                        |
| 4     | 0    | 24                              | 2.0                    | 4     | 0    | 26                              | 1.3                    | 4     | 0    | 19                              | 0.8                    |
| 5     | 0    | 32                              | 2.0                    | 5     | 0    | 23                              | 0.7                    | 5     | 0    | 24                              | 0.4                    |
| 6     | 0    | 30                              | 1.7                    | 6     | 0    | 28                              | 0.2                    | 6     | 0    | 24                              | 0.2                    |

## Journal of Applied Crystallography - citation report by category

| Category                   | 2003            |                                 |                             |                        | 2004            |                                 |                             |                        | 2005            |                                 |                             |                        |
|----------------------------|-----------------|---------------------------------|-----------------------------|------------------------|-----------------|---------------------------------|-----------------------------|------------------------|-----------------|---------------------------------|-----------------------------|------------------------|
|                            | No. of articles | No. of articles in ISI database | No. of articles not covered | Average citation count | No. of articles | No. of articles in ISI database | No. of articles not covered | Average citation count | No. of articles | No. of articles in ISI database | No. of articles not covered | Average citation count |
| research papers            | 224             | 214                             | 10                          | 7.4                    | 110             | 110                             | 0                           | 1.1                    | 110             | 110                             | 0                           | 0.8                    |
| short communications       | 8               | 8                               | 0                           | 0.9                    | 10              | 10                              | 0                           | 0.1                    | 8               | 8                               | 0                           | 0.8                    |
| teaching and education     | 0               | 0                               | 0                           | 0.0                    | 1               | 1                               | 0                           | 3.0                    | 1               | 1                               | 0                           | 0.0                    |
| cryocrystallography papers | 2               | 2                               | 0                           | 2.0                    | 3               | 3                               | 0                           | 1.0                    | 0               | 0                               | 0                           | 0.0                    |
| computer programs          | 14              | 14                              | 0                           | 6.5                    | 14              | 14                              | 0                           | 1.5                    | 13              | 13                              | 0                           | 2.9                    |
| CIF applications           | 3               | 3                               | 0                           | 1.3                    | 2               | 2                               | 0                           | 14.0                   | 0               | 0                               | 0                           | 0.0                    |
| laboratory notes           | 9               | 9                               | 0                           | 1.1                    | 11              | 11                              | 0                           | 0.5                    | 10              | 10                              | 0                           | 0.3                    |
| computer program abstracts | 12              | 0                               | 12                          | 0.0                    | 7               | 1                               | 6                           | 3.0                    | 7               | 0                               | 7                           | 0.0                    |
| letters to the editor      | 0               | 0                               | 0                           | 0.0                    | 2               | 2                               | 0                           | 0.5                    | 0               | 0                               | 0                           | 0.0                    |

|                                        |   |   |   |     |   |   |   |     |   |   |   |     |
|----------------------------------------|---|---|---|-----|---|---|---|-----|---|---|---|-----|
| addenda and errata                     | 0 | 0 | 0 | 0.0 | 1 | 1 | 0 | 0.0 | 1 | 1 | 0 | 0.0 |
| book reviews                           | 4 | 0 | 4 | 0.0 | 1 | 0 | 1 | 0.0 | 3 | 0 | 3 | 0.0 |
| books received                         | 3 | 0 | 3 | 0.0 | 2 | 0 | 2 | 0.0 | 0 | 0 | 0 | 0.0 |
| crystallographers                      | 4 | 2 | 2 | 0.0 | 3 | 3 | 0 | 0.0 | 2 | 2 | 0 | 0.0 |
| issue preface                          | 1 | 0 | 1 | 0.0 | 0 | 0 | 0 | 0.0 | 0 | 0 | 0 | 0.0 |
| issue foreword                         | 1 | 0 | 1 | 0.0 | 0 | 0 | 0 | 0.0 | 0 | 0 | 0 | 0.0 |
| international union of crystallography | 1 | 0 | 1 | 0.0 | 1 | 0 | 1 | 0.0 | 1 | 0 | 1 | 0.0 |
| new commercial products                | 0 | 0 | 0 | 0.0 | 2 | 0 | 2 | 0.0 | 0 | 0 | 0 | 0.0 |

## Highly cited papers

| Journal of Applied Crystallography - 2001 |      |            |                   |               |                              |                                                          |                                                                                                                                                                          |  |  |  |  |  |
|-------------------------------------------|------|------------|-------------------|---------------|------------------------------|----------------------------------------------------------|--------------------------------------------------------------------------------------------------------------------------------------------------------------------------|--|--|--|--|--|
| Issue                                     | Part | First page | Paper category    | ISI citations | Total IUCr citations to date | Authors                                                  | Title                                                                                                                                                                    |  |  |  |  |  |
| 2                                         | 0    | 210        | computer programs | 35            | 13                           | <b>Toby, B.H.</b>                                        | EXPGUI, a graphical user interface for GSAS                                                                                                                              |  |  |  |  |  |
| 1                                         | 0    | 33         | research papers   | 33            | 2                            | Kozin, M.B., <b>Svergun, D.I.</b>                        | Automated matching of high- and low-resolution structural models                                                                                                         |  |  |  |  |  |
| 1                                         | 0    | 82         | computer programs | 31            | 22                           | <b>Evans, G.</b> , Pettifer, R. F.                       | CHOOCH: a program for deriving anomalous-scattering factors from X-ray fluorescence spectra                                                                              |  |  |  |  |  |
| 3                                         | 0    | 298        | research papers   | 31            | 9                            | <b>Ungar, T.</b> , Gubicza, J., Ribarik, G., Borbely, A. | Crystallite size distribution and dislocation structure determined by diffraction profile analysis: principles and practical application to cubic and hexagonal crystals |  |  |  |  |  |
| 2                                         | 0    | 130        | research papers   | 30            | 31                           | <b>Weiss, M.S.</b>                                       | Global indicators of X-ray data quality                                                                                                                                  |  |  |  |  |  |

| Journal of Applied Crystallography - 2002 |      |            |                      |               |                              |                                                                                                                                                                                                                   |                                                                                                                                                                                                     |  |  |  |  |  |
|-------------------------------------------|------|------------|----------------------|---------------|------------------------------|-------------------------------------------------------------------------------------------------------------------------------------------------------------------------------------------------------------------|-----------------------------------------------------------------------------------------------------------------------------------------------------------------------------------------------------|--|--|--|--|--|
| Issue                                     | Part | First page | Paper category       | ISI citations | Total IUCr citations to date | Authors                                                                                                                                                                                                           | Title                                                                                                                                                                                               |  |  |  |  |  |
| 2                                         | 0    | 278        | short communications | 17            | 8                            | Santarsiero, B.D., Yegian, D.T., Lee, C.C., Spraggon, G., Gu, J., Scheibe, D., Uber, D.C., Cornell, E.W., Nordmeyer, R.A., Kolbe, W.F., Jin, J., Jones, A.L., Jaklevic, J.M., Schultz, P.G., <b>Stevens, R.C.</b> | An approach to rapid protein crystallization using nanodroplets                                                                                                                                     |  |  |  |  |  |
| 1                                         | 0    | 82         | research papers      | 14            | 4                            | Wcislak, L., Klein, H., <b>Bunge, H.J.</b> , Garbe, U., Tschentscher, T., Schneider, J.R.                                                                                                                         | Texture analysis with high-energy synchrotron radiation                                                                                                                                             |  |  |  |  |  |
| 2                                         | 0    | 168        | research papers      | 11            | 8                            | Cooper, R.I., Gould, R.O., <b>Parsons, S.</b> , Watkin, D.J.                                                                                                                                                      | The derivation of non-merohedral twin laws during refinement by analysis of poorly fitting intensity data and the refinement of non-merohedrally twinned crystal structures in the program CRYSTALS |  |  |  |  |  |
| 6                                         | 0    | 734        | computer programs    | 10            | 10                           | <b>Favre-Nicolin, V.</b> , Cerny, R.                                                                                                                                                                              | FOX, 'free objects for crystallography': a modular approach to ab initio structure determination from powder diffraction                                                                            |  |  |  |  |  |
| 1                                         | 0    | 126        | computer programs    | 9             | 9                            | Grosse-Kunstleve, R.W., Sauter, N.K., Moriarty, N.W., <b>Adams, P.D.</b>                                                                                                                                          | The Computational Crystallography Toolbox: crystallographic algorithms in a reusable software framework                                                                                             |  |  |  |  |  |

| Journal of Applied Crystallography - 2003 |      |            |                   |               |                              |                                                                                 |                                                                                                |
|-------------------------------------------|------|------------|-------------------|---------------|------------------------------|---------------------------------------------------------------------------------|------------------------------------------------------------------------------------------------|
| Issue                                     | Part | First page | Paper category    | ISI citations | Total IUCr citations to date | Authors                                                                         | Title                                                                                          |
| 1                                         | 0    | 7          | research papers   | 1054          | 1010                         | <b>Spek, A.L.</b>                                                               | Single-crystal structure validation with the program PLATON                                    |
| 2                                         | 0    | 220        | research papers   | 56            | 38                           | <b>Duisenberg, A.J.M.</b> , Kroon-Batenburg, L.M.J., Schreurs, A.M.M.           | An intensity evaluation method: EVAL-14                                                        |
| 3                                         | 2    | 944        | computer programs | 47            | 4                            | <b>Fenn, T.D.</b> , Ringe, D., Petsko, G.A.                                     | POVScript+: a program for model and data visualization using persistence of vision ray-tracing |
| 5                                         | 0    | 1277       | computer programs | 21            | 2                            | Konarev, P.V., Volkov, V.V., Sokolova, A.V., Koch, M.H.J., <b>Svergun, D.I.</b> | PRIMUS: a Windows PC-based system for small-angle scattering data analysis                     |
| 3                                         | 1    | 860        | research papers   | 20            | 1                            | <b>Volkov, V.V.</b> , Svergun, D.I.                                             | Uniqueness of ab initio shape determination in small-angle scattering                          |

| Journal of Applied Crystallography - 2004 |      |            |                   |               |                              |                                                                                                                                                                  |                                                                                                                                                       |
|-------------------------------------------|------|------------|-------------------|---------------|------------------------------|------------------------------------------------------------------------------------------------------------------------------------------------------------------|-------------------------------------------------------------------------------------------------------------------------------------------------------|
| Issue                                     | Part | First page | Paper category    | ISI citations | Total IUCr citations to date | Authors                                                                                                                                                          | Title                                                                                                                                                 |
| 2                                         | 0    | 335        | cif applications  | 28            | 49                           | <b>Allen, F.H.</b> , Johnson, O., Shields, G.P., Smith, B.R., Towler, M.                                                                                         | CIF applications. XV. enCIFer: a program for viewing, editing and visualizing CIFs                                                                    |
| 2                                         | 0    | 231        | research papers   | 8             | 5                            | <b>Gilmore, C.J.</b> , Barr, G., Paisley, J.                                                                                                                     | High-throughput powder diffraction. I. A new approach to qualitative and quantitative powder diffraction pattern analysis using full pattern profiles |
| 4                                         | 0    | 513        | research papers   | 7             | 12                           | Murray, J.W., <b>Garman, E.F.</b> , <b>Ravelli, R.B.G.</b>                                                                                                       | X-ray absorption by macromolecular crystals: the effects of wavelength and crystal composition on absorbed dose                                       |
| 4                                         | 0    | 575        | research papers   | 6             | 0                            | <b>Ruland, W.</b> , Smarsly, B.                                                                                                                                  | SAXS of self-assembled oriented lamellar nanocomposite films: an advanced method of evaluation                                                        |
| 3                                         | 0    | 410        | research papers   | 6             | 8                            | Dawson, A., Allan, D.R., <b>Parsons, S.</b> , Ruf, M.                                                                                                            | Use of a CCD diffractometer in crystal structure determinations at high pressure                                                                      |
| 1                                         | 0    | 72         | research papers   | 6             | 6                            | Ohana, J., Jacquamet, L., Joly, J., Bertoni, A., Taunier, P., Michel, L., Charrault, P., Pirocchi, M., Carpentier, P., Borel, F., Kahn, R., <b>Ferrer, J.-L.</b> | CATS: a Cryogenic Automated Transfer System installed on the beamline FIP at ESRF                                                                     |
| 2                                         | 0    | 243        | research papers   | 6             | 6                            | Barr, G., Dong, W., <b>Gilmore, C.J.</b>                                                                                                                         | High-throughput powder diffraction. II. Applications of clustering methods and multivariate data analysis                                             |
| 2                                         | 0    | 265        | research papers   | 5             | 4                            | <b>Andrey, P.</b> , Lavault, B., Cipriani, F., Maurin, Y.                                                                                                        | Using image analysis for automated crystal positioning in a synchrotron X-ray beam for high-throughput macromolecular crystallography                 |
| 1                                         | 0    | 24         | research papers   | 5             | 6                            | <b>Langan, P.</b> , Greene, G., Schoenborn, B.P.                                                                                                                 | Protein crystallography with spallation neutrons: the user facility at Los Alamos Neutron Science Center                                              |
| 3                                         | 0    | 486        | computer programs | 4             | 1                            | <b>Angel, R.J.</b>                                                                                                                                               | Absorption corrections for diamond-anvil pressure cells implemented in the software package Absorb6.0                                                 |
| 1                                         | 0    | 78         | research papers   | 4             | 0                            | <b>Wu, J.S.</b> , Spence, J.C.H.                                                                                                                                 | Electron diffraction of thin-film pentacene                                                                                                           |

**Journal of Applied Crystallography - 2005**

| Issue | Part | First page | Paper category       | ISI citations | Total IUCr citations to date | Authors                                                                                                                                 | Title                                                                                                                                                                                      |
|-------|------|------------|----------------------|---------------|------------------------------|-----------------------------------------------------------------------------------------------------------------------------------------|--------------------------------------------------------------------------------------------------------------------------------------------------------------------------------------------|
| 2     | 0    | 381        | computer programs    | 15            | 6                            | Burla, M.C., Caliandro, R., Camalli, M., Carrozzini, B., Cascarano, G.L., De Caro, L., <b>Giacovazzo, C.</b> , Polidori, G., Spagna, R. | SIR2004: an improved tool for crystal structure determination and refinement                                                                                                               |
| 1     | 0    | 78         | research papers      | 8             | 0                            | <b>Ruland, W.</b> , Smarsly, B.                                                                                                         | SAXS of self-assembled nanocomposite films with oriented two-dimensional cylinder arrays: an advanced method of evaluation                                                                 |
| 1     | 0    | 1          | topical reviews      | 8             | 0                            | <b>Welzel, U.</b> , Ligot, J., Lamparter, P., Vermeulen, A.C., Mittemeijer, E.J.                                                        | Stress analysis of polycrystalline thin films and surface regions by X-ray diffraction                                                                                                     |
| 1     | 0    | 228        | computer programs    | 8             | 4                            | <b>Chisholm, J.A.</b> , Motherwell, S.                                                                                                  | COMPACT: a program for identifying crystal structure similarity using distances                                                                                                            |
| 3     | 0    | 412        | research papers      | 6             | 2                            | Chinte, U., Shah, B., <b>DeWitt, K.</b> , Kirschbaum, K., Pinkerton, A.A., <b>Schall, C.</b>                                            | Sample size: an important parameter in flash-cooling macromolecular crystallization solutions                                                                                              |
| 2     | 0    | 311        | research papers      | 5             | 0                            | <b>Keckes, J.</b>                                                                                                                       | Simultaneous determination of experimental elastic and thermal strains in thin films                                                                                                       |
| 1     | 0    | 199        | research papers      | 4             | 0                            | Guilmeau, E., <b>Chateigner, D.</b> , Noudem, J., Funahashi, R., Horii, S., Ouladdiaf, B.                                               | Rietveld texture analysis of complex oxides: examples of polyphased Bi2223 superconducting and Co349 thermoelectric textured ceramics characterization using neutron and X-ray diffraction |
| 1     | 0    | 139        | research papers      | 4             | 0                            | <b>Kaiser-Bischoff, I.</b> , Boysen, H., Frey, F., Hoffmann, J.-U., Hohlwein, D., Lerch, M.                                             | The defect structure of Y- and N-doped zirconia                                                                                                                                            |
| 4     | 0    | 697        | computer programs    | 4             | 0                            | <b>Le Page, Y.</b> , Rodgers, J.R.                                                                                                      | Quantum software interfaced with crystal-structure databases: tools, results and perspectives                                                                                              |
| 2     | 0    | 377        | short communications | 3             | 0                            | Ischia, G., <b>Wenk, H.-R.</b> , Lutterotti, L., Berberich, F.                                                                          | Quantitative Rietveld texture analysis of zirconium from single synchrotron diffraction images                                                                                             |
| 4     | 0    | 661        | research papers      | 3             | 0                            | Liu, J., Kim, K., Golshan, M., Laundy, D., <b>Korsunsky, A.M.</b>                                                                       | Energy calibration and full-pattern refinement for strain analysis using energy-dispersive and monochromatic X-ray diffraction                                                             |

## Background information on JSR

### Papers submitted (2000-2005)

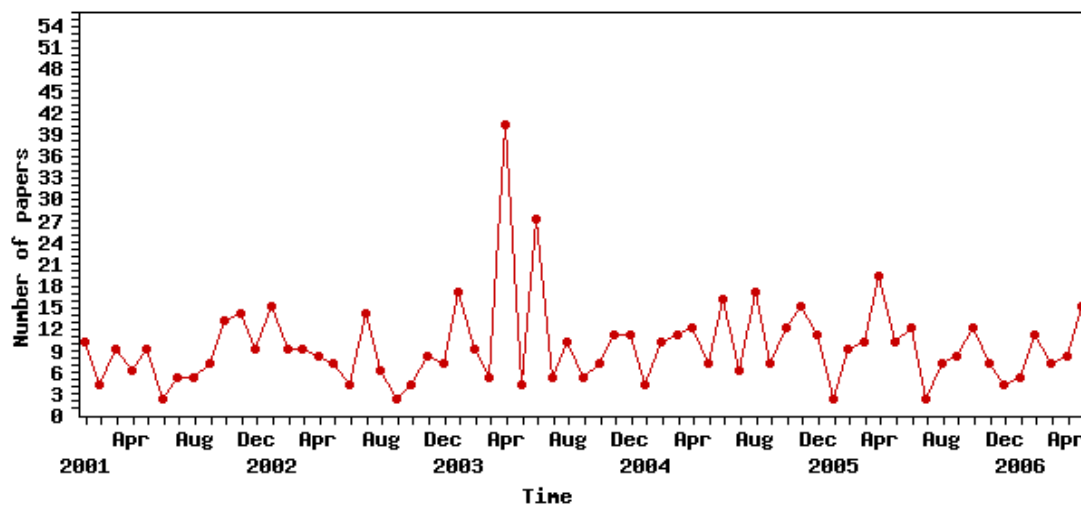

### Papers published (2000-2005)

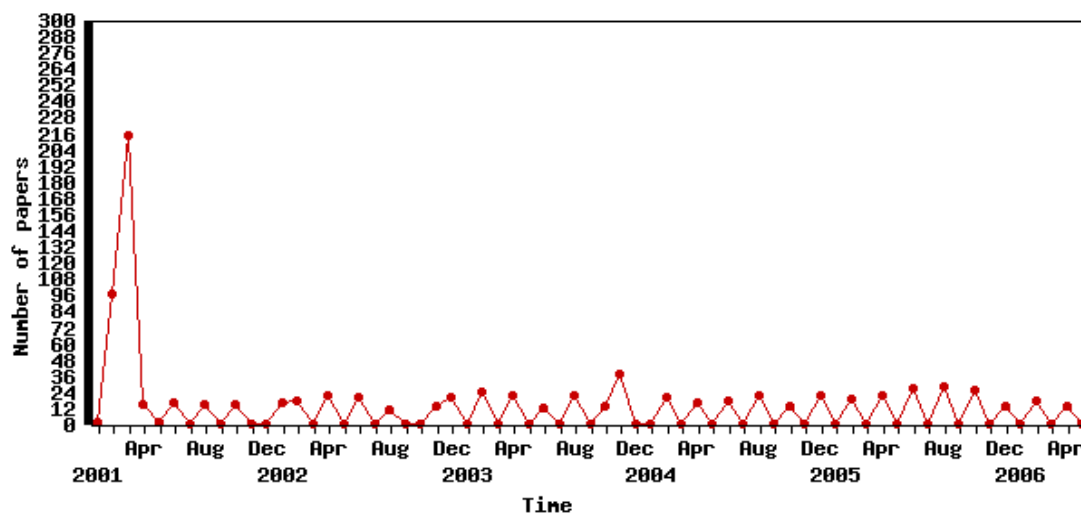

### Numbers at a glance Journal of Synchrotron Radiation

|                           |       |
|---------------------------|-------|
| Consortia deals           | 2709  |
| Institutional subscribers | 147   |
| Individual subscribers    | 59    |
| Impact Factor (2005)      | 2.392 |
| Ranking (2005)            | 3/20  |

## Journal of Synchrotron Radiation - competing journals based on citing

Number of times articles published in 2004 (in journals below) cited articles published in *Journal of Synchrotron Radiation*

| Impact | Citing Journal       | Cited Year |      |      |      |      |      |      |      |      |      |
|--------|----------------------|------------|------|------|------|------|------|------|------|------|------|
|        |                      | All Yrs    | 2004 | 2003 | 2002 | 2001 | 2000 | 1999 | 1998 | 1997 | 1996 |
|        | ALL JOURNALS         | 1571       | 43   | 124  | 160  | 298  | 95   | 257  | 415  | 50   | 56   |
|        | AIP CONF P           | 201        | 0    | 11   | 20   | 21   | 14   | 13   | 103  | 5    | 9    |
| 1.919  | J SYNCHROTRON RADIAT | 122        | 7    | 12   | 17   | 13   | 11   | 23   | 26   | 3    | 6    |
|        | ALL OTHERS (118)     | 118        | 6    | 10   | 11   | 20   | 10   | 26   | 22   | 4    | 2    |
| 3.075  | PHYS REV B           | 67         | 0    | 13   | 4    | 18   | 1    | 10   | 11   | 0    | 4    |
|        | P SOC PHOTO-OPT INS  | 47         | 0    | 5    | 4    | 9    | 5    | 9    | 12   | 0    | 2    |
| 3.834  | J PHYS CHEM B        | 33         | 0    | 2    | 2    | 12   | 0    | 11   | 4    | 0    | 1    |
| 1.142  | JPN J APPL PHYS      | 29         | 7    | 1    | 3    | 2    | 3    | 0    | 13   | 0    | 0    |
| 1.069  | J ELECTRON SPECTROSC | 25         | 0    | 1    | 1    | 7    | 1    | 4    | 9    | 0    | 1    |
| 1.349  | NUCL INSTRUM METH A  | 25         | 0    | 1    | 2    | 3    | 4    | 1    | 10   | 1    | 2    |
| 1.562  | J ALLOY COMPD        | 24         | 0    | 0    | 0    | 2    | 1    | 10   | 10   | 1    | 0    |
| 3.534  | J APPL CRYSTALLOGR   | 24         | 2    | 3    | 5    | 0    | 2    | 0    | 6    | 2    | 1    |
| 1.693  | ACTA CRYSTALLOGR D   | 23         | 3    | 0    | 11   | 0    | 0    | 2    | 4    | 1    | 0    |
| 1.226  | REV SCI INSTRUM      | 22         | 0    | 2    | 3    | 2    | 1    | 4    | 5    | 1    | 1    |
| 2.049  | J PHYS-CONDENS MAT   | 18         | 0    | 1    | 3    | 2    | 0    | 2    | 6    | 3    | 1    |
| 1.785  | AM MINERAL           | 17         | 0    | 1    | 0    | 11   | 1    | 3    | 1    | 0    | 0    |
| 5.45   | ANAL CHEM            | 17         | 0    | 6    | 6    | 0    | 0    | 4    | 0    | 1    | 0    |
| 4.008  | BIOCHEMISTRY-US      | 16         | 3    | 4    | 1    | 3    | 2    | 1    | 1    | 0    | 0    |
|        | NATO SCI SER II MATH | 16         | 0    | 0    | 2    | 4    | 0    | 1    | 2    | 2    | 1    |
| 2.902  | PHYS REV A           | 16         | 0    | 2    | 2    | 2    | 0    | 3    | 4    | 1    | 1    |
| 0.13   | PHYS REV SPEC TOP-AC | 16         | 0    | 0    | 0    | 1    | 1    | 0    | 14   | 0    | 0    |

## Journal of Synchrotron Radiation - citation report by issue

Special issues are shaded.

| 2003  |      |                                 |                        | 2004  |      |                                 |                        | 2005  |      |                                 |                        |
|-------|------|---------------------------------|------------------------|-------|------|---------------------------------|------------------------|-------|------|---------------------------------|------------------------|
| Issue | Part | No. of articles in ISI database | Average citation count | Issue | Part | No. of articles in ISI database | Average citation count | Issue | Part | No. of articles in ISI database | Average citation count |
| 1     | 0    | 16                              | 7.1                    | 1     | 0    | 36                              | 1.7                    | 1     | 0    | 20                              | 1.7                    |
| 2     | 0    | 23                              | 1.7                    | 2     | 0    | 13                              | 0.8                    | 2     | 0    | 17                              | 1.1                    |
| 3     | 0    | 21                              | 1.8                    | 3     | 0    | 11                              | 1.2                    | 3     | 0    | 19                              | 2.4                    |
| 4     | 0    | 8                               | 1.2                    | 4     | 0    | 15                              | 0.6                    | 4     | 0    | 26                              | 1.3                    |
| 5     | 0    | 18                              | 0.7                    | 5     | 0    | 13                              | 0.5                    | 5     | 0    | 26                              | 0.5                    |
| 6     | 0    | 10                              | 2.3                    | 6     | 0    | 11                              | 0.2                    | 6     | 0    | 22                              | 0.1                    |

## Journal of Synchrotron Radiation - citation report by category

| Category               | 2003            |                                 |                             |                        | 2004            |                                 |                             |                        | 2005            |                                 |                             |                        |
|------------------------|-----------------|---------------------------------|-----------------------------|------------------------|-----------------|---------------------------------|-----------------------------|------------------------|-----------------|---------------------------------|-----------------------------|------------------------|
|                        | No. of articles | No. of articles in ISI database | No. of articles not covered | Average citation count | No. of articles | No. of articles in ISI database | No. of articles not covered | Average citation count | No. of articles | No. of articles in ISI database | No. of articles not covered | Average citation count |
| research papers        | 72              | 72                              | 0                           | 3.1                    | 84              | 84                              | 0                           | 1.2                    | 119             | 119                             | 0                           | 1.1                    |
| short communications   | 6               | 6                               | 0                           | 1.3                    | 3               | 3                               | 0                           | 0.0                    | 2               | 2                               | 0                           | 0.5                    |
| lead articles          | 1               | 1                               | 0                           | 3.0                    | 0               | 0                               | 0                           | 0.0                    | 0               | 0                               | 0                           | 0.0                    |
| computer programs      | 1               | 1                               | 0                           | 2.0                    | 1               | 1                               | 0                           | 0.0                    | 2               | 2                               | 0                           | 6.0                    |
| laboratory notes       | 0               | 0                               | 0                           | 0.0                    | 0               | 0                               | 0                           | 0.0                    | 1               | 1                               | 0                           | 0.0                    |
| letters to the editor  | 3               | 3                               | 0                           | 0.0                    | 2               | 2                               | 0                           | 0.0                    | 0               | 0                               | 0                           | 0.0                    |
| teaching and education | 0               | 0                               | 0                           | 0.0                    | 0               | 0                               | 0                           | 0.0                    | 1               | 1                               | 0                           | 1.0                    |
| addenda and errata     | 2               | 2                               | 0                           | 0.0                    | 0               | 0                               | 0                           | 0.0                    | 1               | 1                               | 0                           | 0.0                    |
| new commercial         | 0               | 0                               | 0                           | 0.0                    | 1               | 0                               | 1                           | 0.0                    | 2               | 0                               | 2                           | 0.0                    |

|                                        |    |    |   |     |    |   |    |     |   |   |   |     |
|----------------------------------------|----|----|---|-----|----|---|----|-----|---|---|---|-----|
| products                               |    |    |   |     |    |   |    |     |   |   |   |     |
| book reviews                           | 2  | 0  | 2 | 0.0 | 0  | 0 | 0  | 0.0 | 0 | 0 | 0 | 0.0 |
| international union of crystallography | 1  | 0  | 1 | 0.0 | 1  | 0 | 1  | 0.0 | 2 | 1 | 1 | 0.0 |
| current events                         | 20 | 11 | 9 | 0.0 | 25 | 7 | 18 | 0.0 | 6 | 3 | 3 | 0.0 |
| obituaries                             | 0  | 0  | 0 | 0.0 | 2  | 2 | 0  | 0.0 | 0 | 0 | 0 | 0.0 |

## Highly cited papers

| Journal of Synchrotron Radiation - 2001 |      |            |                      |               |                              |                                                                                                                        |                                                                                                                                                                                                                          |  |  |  |  |  |
|-----------------------------------------|------|------------|----------------------|---------------|------------------------------|------------------------------------------------------------------------------------------------------------------------|--------------------------------------------------------------------------------------------------------------------------------------------------------------------------------------------------------------------------|--|--|--|--|--|
| Issue                                   | Part | First page | Paper category       | ISI citations | Total IUCr citations to date | Authors                                                                                                                | Title                                                                                                                                                                                                                    |  |  |  |  |  |
| 2                                       | 0    | 322        | short communications | 26            | 3                            | <b>Newville, M.</b>                                                                                                    | IFEFFIT : interactive XAFS analysis and FEFF fitting                                                                                                                                                                     |  |  |  |  |  |
| 2                                       | 0    | 314        | short communications | 24            | 4                            | <b>Ravel, B.</b>                                                                                                       | ATOMS: crystallography for the X-ray absorption spectroscopist                                                                                                                                                           |  |  |  |  |  |
| 5                                       | 0    | 1162       | research papers      | 17            | 3                            | <b>Meneghini, C.</b> , Artioli, G., Balerna, A., Gualtieri, A.F., Norby, P., Mobilio, S.                               | Multipurpose imaging-plate camera for in situ powder XRD at the GILDA beamline                                                                                                                                           |  |  |  |  |  |
| 2                                       | 0    | 55         | research papers      | 13            | 1                            | <b>Thomas, J.M.</b> , Sankar, G.                                                                                       | The role of XAFS in the in situ and ex situ elucidation of active sites in designed solid catalysts                                                                                                                      |  |  |  |  |  |
| 2                                       | 0    | 569        | short communications | 12            | 0                            | <b>Yamashita, H.</b> , Harada, M., Misaka, J., Takeuchi, M., Ichihashi, Y., Goto, F., Ishida, M., Sasaki, T., Anpo, M. | Application of ion beam techniques for preparation of metal ion-implanted <a href="#">TiO2</a> thin film photocatalyst available under visible light irradiation: metal ion-implantation and ionized cluster beam method |  |  |  |  |  |

| Journal of Synchrotron Radiation - 2002 |      |            |                 |               |                              |                                                                                                                                      |                                                                                                                                                                                                                                                              |  |  |  |  |  |
|-----------------------------------------|------|------------|-----------------|---------------|------------------------------|--------------------------------------------------------------------------------------------------------------------------------------|--------------------------------------------------------------------------------------------------------------------------------------------------------------------------------------------------------------------------------------------------------------|--|--|--|--|--|
| Issue                                   | Part | First page | Paper category  | ISI citations | Total IUCr citations to date | Authors                                                                                                                              | Title                                                                                                                                                                                                                                                        |  |  |  |  |  |
| 6                                       | 0    | 355        | research papers | 10            | 14                           | <b>Ravelli, R.B.G.</b> , Theveneau, P., <a href="#">McSweeney, S.</a> , Caffrey, M.                                                  | Unit-cell volume change as a metric of radiation damage in crystals of macromolecules Presented at the `Second International Workshop on Radiation Damage to Crystalline Biological Samples' held at Advanced Photon Source, Chicago, USA, in December 2001. |  |  |  |  |  |
| 6                                       | 0    | 361        | research papers | 8             | 6                            | <b>Snell, E.H.</b> , Judge, R.A., Larson, M., van der Woerd, M.J.                                                                    | Seeing the heat - preliminary studies of cryocrystallography using infrared imaging Presented at the `Second International Workshop on Radiation Damage to Crystalline Biological Samples' held at Advanced Photon Source, Chicago, USA, in December 2001.   |  |  |  |  |  |
| 3                                       | 0    | 182        | research papers | 8             | 1                            | <b>Kamijo, N.</b> , Suzuki, Y., Awaji, M., Takeuchi, A., Takano, H., Ninomiya, T., Tamura, S., Yasumoto, M.                          | Hard X-ray microbeam experiments with a sputtered-sliced Fresnel zone plate and its applications                                                                                                                                                             |  |  |  |  |  |
| 5                                       | 0    | 317        | research papers | 7             | 3                            | <b>Shastri, S.D.</b> , Fezzaa, K., Mashayekhi, A., Lee, W.-K., Fernandez, P.B., Lee, P.L.                                            | Cryogenically cooled bent double-Laue monochromator for high-energy undulator X-rays (50-200 keV)                                                                                                                                                            |  |  |  |  |  |
| 5                                       | 0    | 313        | research papers | 7             | 1                            | <b>Yamauchi, K.</b> , Yamamura, K., Mimura, H., Sano, Y., Saito, A., Souvorov, A., Yabashi, M., Tamasaku, K., Ishikawa, T., Mori, Y. | Nearly diffraction-limited line focusing of a hard-X-ray beam with an elliptically figured mirror                                                                                                                                                            |  |  |  |  |  |

| Journal of Synchrotron Radiation - 2003 |      |            |                 |               |                              |                                                                 |                                                                                                                                   |
|-----------------------------------------|------|------------|-----------------|---------------|------------------------------|-----------------------------------------------------------------|-----------------------------------------------------------------------------------------------------------------------------------|
| Issue                                   | Part | First page | Paper category  | ISI citations | Total IUCr citations to date | Authors                                                         | Title                                                                                                                             |
| 1                                       | 0    | 51         | research papers | 19            | 6                            | <b>Benfatto, M.</b> , Della Longa, S., Natoli, C.R.             | The MXAN procedure: a new method for analysing the XANES spectra of metalloproteins to obtain structural quantitative information |
| 1                                       | 0    | 26         | research papers | 16            | 3                            | <b>Natoli, C.R.</b> , Benfatto, M., Della Longa, S., Hatada, K. | X-ray absorption spectroscopy: state-of-the-art analysis                                                                          |
| 1                                       | 0    | 23         | research papers | 13            | 3                            | <b>Winn, M.D.</b>                                               | An overview of the CCP4 project in protein crystallography: an example of a collaborative project                                 |
| 1                                       | 0    | 16         | research papers | 13            | 3                            | <b>Ascone, I.</b> , Meyer-Klaucke, W., Murphy, L.               | Experimental aspects of biological X-ray absorption spectroscopy                                                                  |
| 1                                       | 0    | 9          | research papers | 12            | 5                            | <b>Hasnain, S.S.</b> , Strange, R.W.                            | Marriage of XAFS and crystallography for structure-function studies of metalloproteins                                            |

| Journal of Synchrotron Radiation - 2004 |      |            |                 |               |                              |                                                                                                                                                       |                                                                                                                                       |
|-----------------------------------------|------|------------|-----------------|---------------|------------------------------|-------------------------------------------------------------------------------------------------------------------------------------------------------|---------------------------------------------------------------------------------------------------------------------------------------|
| Issue                                   | Part | First page | Paper category  | ISI citations | Total IUCr citations to date | Authors                                                                                                                                               | Title                                                                                                                                 |
| 1                                       | 0    | 121        | research papers | 10            | 3                            | <b>Adachi, H.</b> , Takano, K., Matsumura, H., Inoue, T., Mori, Y., Sasaki, T.                                                                        | Protein crystal growth with a two-liquid system and stirring solution                                                                 |
| 1                                       | 0    | 56         | research papers | 9             | 8                            | Morris, R.J., Zwart, P.H., Cohen, S., Fernandez, F.J., Kakaris, M., Kirillova, O., Vonrhein, C., <b>Perrakis, A.</b> , Lamzin, V.S.                   | Breaking good resolutions with ARP/wARP                                                                                               |
| 3                                       | 0    | 239        | research papers | 6             | 1                            | <b>Marcus, M.A.</b> , <a href="#">MacDowell</a> , A.A., Celestre, R., Manceau, A., Miller, T., Padmore, H.A., Sublett, R.E.                           | Beamline 10.3.2 at ALS: a hard X-ray microprobe for environmental and materials sciences                                              |
| 1                                       | 0    | 1          | research papers | 5             | 5                            | <b>Helliwell, J.R.</b>                                                                                                                                | Overview and new developments in softer X-ray ( $2\text{\AA} < \lambda < 5\text{\AA}$ ) protein crystallography                       |
| 4                                       | 0    | 328        | research papers | 4             | 1                            | <b>Knapp, M.</b> , Baecht, C., Ehrenberg, H., Fuess, H.                                                                                               | The synchrotron powder diffractometer at beamline B2 at HASYLAB/DESY: status and capabilities                                         |
| 5                                       | 0    | 423        | research papers | 4             | 0                            | <b>Mathon, O.</b> , Baudelet, F., Itie, J.-P., Pasternak, S., Polian, A., Pascarelli, S.                                                              | XMCD under pressure at the Fe K edge on the energy-dispersive beamline of the ESRF                                                    |
| 1                                       | 0    | 49         | research papers | 4             | 4                            | <b>Terwilliger, T.</b>                                                                                                                                | SOLVE and RESOLVE: automated structure solution, density modification and model building                                              |
| 1                                       | 0    | 83         | research papers | 4             | 0                            | <b>Carragher, B.</b> , Fellmann, D., Guerra, F., Milligan, R.A., Mouche, F., Pulokas, J., Sheehan, B., Quispe, J., Suloway, C., Zhu, Y., Potter, C.S. | Rapid routine structure determination of macromolecular assemblies using electron microscopy: current progress and further challenges |
| 3                                       | 0    | 278        | research papers | 3             | 2                            | <b>Ciatto, G.</b> , d'Acapito, F., Boscherini, F., Mobilio, S.                                                                                        | Treatment of EXAFS data taken in the fluorescence mode in non-linear conditions                                                       |
| 1                                       | 0    | 97         | research papers | 3             | 0                            | <b>Moore, J.</b> , Abdul-Manan, N., Fejzo, J., Jacobs, M., Lepre, C., Peng, J., Xie, X.                                                               | Leveraging structural approaches: applications of NMR-based screening and X-ray crystallography for inhibitor design                  |

| Journal of Synchrotron Radiation - 2005 |      |            |                   |               |                              |                                 |                                                                                            |
|-----------------------------------------|------|------------|-------------------|---------------|------------------------------|---------------------------------|--------------------------------------------------------------------------------------------|
| Issue                                   | Part | First page | Paper category    | ISI citations | Total IUCr citations to date | Authors                         | Title                                                                                      |
| 4                                       | 0    | 537        | computer programs | 12            | 0                            | <b>Ravel, B.</b> , Newville, M. | ATHENA, ARTEMIS, HEPHAESTUS: data analysis for X-ray absorption spectroscopy using IFEFFIT |

|   |   |     |                 |   |   |                                                                                                                                                                                                                                                                |                                                                                                                                                        |
|---|---|-----|-----------------|---|---|----------------------------------------------------------------------------------------------------------------------------------------------------------------------------------------------------------------------------------------------------------------|--------------------------------------------------------------------------------------------------------------------------------------------------------|
| 3 | 0 | 268 | research papers | 7 | 6 | Murray, J.W., Rudino-Pinera, E., Owen, R.L., Grininger, M., Ravelli, R.B.G., <b>Garman, E.F.</b>                                                                                                                                                               | Parameters affecting the X-ray dose absorbed by macromolecular crystals                                                                                |
| 1 | 0 | 19  | research papers | 6 | 2 | <b>Scott, R.A.</b> , Shokes, J.E., Cosper, N.J., Jenney, F.E., Adams, M.W.W.                                                                                                                                                                                   | Bottlenecks and roadblocks in high-throughput XAS for structural genomics                                                                              |
| 4 | 0 | 455 | research papers | 6 | 0 | Cianci, M., Antonyuk, S., Bliss, N., Bailey, M.W., Buffey, S.G., Cheung, K.C., Clarke, J.A., Derbyshire, G.E., Ellis, M.J., Enderby, M.J., Grant, A.F., Holbourn, M.P., Laundy, D., Nave, C., Ryder, R., Stephenson, P., Helliwell, J.R., <b>Hasnain, S.S.</b> | A high-throughput structural biology/proteomics beamline at the SRS on a new multipole wiggler                                                         |
| 3 | 0 | 276 | research papers | 6 | 5 | <b>Ravelli, R.B.G.</b> , Nanao, M.H., Lovering, A., White, S., <b>McSweeney, S.</b>                                                                                                                                                                            | Phasing in the presence of radiation damage                                                                                                            |
| 2 | 0 | 241 | research papers | 5 | 1 | <b>Coan, P.</b> , Pagot, E., Fiedler, S., Cloetens, P., Baruchel and, J., Bravin, A.                                                                                                                                                                           | Phase-contrast X-ray imaging combining free space propagation and Bragg diffraction                                                                    |
| 2 | 0 | 177 | research papers | 5 | 0 | <b>DeCamp</b> , M.F., <b>Reis, D.A.</b> , Fritz, D.M., Bucksbaum, P.H., Dufresne, E.M., Clarke, R.                                                                                                                                                             | X-ray synchrotron studies of ultrafast crystalline dynamics                                                                                            |
| 3 | 0 | 318 | research papers | 5 | 4 | Mhaisekar, A., <b>Kazmierczak, M.J.</b> , Banerjee, R.                                                                                                                                                                                                         | Three-dimensional numerical analysis of convection and conduction cooling of spherical biocrystals with localized heating from synchrotron X-ray beams |
| 1 | 0 | 35  | research papers | 4 | 0 | <b>Haumann, M.</b> , Muller, C., Liebisch, P., Neisius, T., <b>Dau, H.</b>                                                                                                                                                                                     | A novel BioXAS technique with sub-millisecond time resolution to track oxidation state and structural changes at biological metal centers              |
| 3 | 0 | 354 | research papers | 4 | 0 | Lonardelli, I., <b>Wenk, H.-R.</b> , Lutterotti, L., Goodwin, M.                                                                                                                                                                                               | Texture analysis from synchrotron diffraction images with the Rietveld method: dinosaur tendon and salmon scale                                        |
| 4 | 0 | 410 | research papers | 4 | 0 | Djinovic Carugo, K., Helliwell, J.R., Stuhmann, H., <b>Weiss, M.S.</b>                                                                                                                                                                                         | Softer and soft X-rays in macromolecular crystallography                                                                                               |
| 3 | 0 | 299 | research papers | 4 | 3 | <b>Nave, C.</b> , Hill, M.A.                                                                                                                                                                                                                                   | Will reduced radiation damage occur with very small crystals?                                                                                          |
